# Supplementary material for: Frames and Doubly Resolvable Group Divisible Designs with Block Size Three and Index Two
Source: Springer Nature journal article supplement (doi:10.1007/s00373-023-02681-5), 2023-08-27
Supplement: 373_2023_2681_MOESM1_ESM.pdf [file 373_2023_2681_MOESM1_ESM.pdf]

## Appendix

Table A (S, C, R) and A for (1, 2; 3)-frames of type  $3^u(3\ell)^1$ 

| C                     |       | R                     |                       | A (1, 2; 3)-frame of type $3^{15}3^1$  |                       |  |
|-----------------------|-------|-----------------------|-----------------------|----------------------------------------|-----------------------|--|
| Starter               | Adder | Starter+ Adder        | Starter               | Adder                                  | Starter + Adder       |  |
| 5, 9, 13              |       | 14, 24, 37            |                       |                                        |                       |  |
| 21, 31, 42            | 1     | 22, 32, 43            | 20, 32, 40            | 6                                      | 26, 38, 1             |  |
| 1, 2, 3               | 4     | 5, 6, 7               | 4, 6, 11              | 23                                     | 27, 29, 34            |  |
| 7, 10, 16             | 37    | 44, 2, 8              | 8, 19, 35             | 20                                     | 28, 39, 10            |  |
| 12, 28, 37            | 28    | 40, 11, 20            | 14, 33, 38            | 43                                     | 12, 31, 36            |  |
| 17, 29, 43            | 25    | 42, 9, 23             | 18, 24, 41            | 17                                     | 35, 41, 13            |  |
| 22, 25, 39            | 39    | 16, 19, 33            | 23, 36, $\infty_0$    | 26                                     | 4, 17, $\infty_0$     |  |
| 26, 44, $\infty_1$    | 22    | 3, 21, $\infty_1$     | 27, 34, $\infty_2$    | 36                                     | 18, 25, $\infty_2$    |  |
| C                     |       | R                     |                       | A (1, 2; 3)-frame of type $3^{17}3^1$  |                       |  |
| Starter               | Adder | Starter+ Adder        | Starter               | Adder                                  | Starter + Adder       |  |
| 3, 5, 10              |       | 6, 11, 22             |                       |                                        |                       |  |
| 1, 43, 44             | 49    | 50, 41, 42            | 24, 39, 48            | 21                                     | 45, 9, 18             |  |
| 4, 6, 7               | 48    | 1, 3, 4               | 13, 27, 31            | 1                                      | 14, 28, 32            |  |
| 12, 23, 26            | 12    | 24, 35, 38            | 21, 25, 46            | 42                                     | 12, 16, 37            |  |
| 16, 29, 45            | 4     | 20, 33, 49            | 20, 30, 40            | 6                                      | 26, 36, 46            |  |
| 18, 38, 50            | 40    | 7, 27, 39             | 22, 37, 49            | 7                                      | 29, 44, 5             |  |
| 2, 28, 35             | 46    | 48, 23, 30            | 8, 14, 36             | 11                                     | 19, 25, 47            |  |
| 9, 15, 47             | 44    | 2, 8, 40              | 11, 32, $\infty_0$    | 50                                     | 10, 31, $\infty_0$    |  |
| 19, 42, $\infty_1$    | 24    | 43, 15, $\infty_1$    | 33, 41, $\infty_2$    | 31                                     | 13, 21, $\infty_2$    |  |
| C                     |       | R                     |                       | A (1, 2; 3)-frame of type $3^{19}3^1$  |                       |  |
| Starter               | Adder | Starter+ Adder        | Starter               | Adder                                  | Starter + Adder       |  |
| 7, 12, 20             |       | 14, 24, 37            |                       |                                        |                       |  |
| 28, 40, 55            | 1     | 29, 41, 56            | 26, 42, 51            | 2                                      | 28, 44, 53            |  |
| 23, 34, 52            | 8     | 31, 42, 3             | 21, 36, 56            | 9                                      | 30, 45, 8             |  |
| 18, 25, 49            | 15    | 33, 40, 7             | 1, 2, 3               | 45                                     | 46, 47, 48            |  |
| 4, 6, 9               | 12    | 16, 18, 21            | 5, 8, 14              | 53                                     | 1, 4, 10              |  |
| 10, 16, 24            | 56    | 9, 15, 23             | 11, 27, 48            | 43                                     | 54, 13, 34            |  |
| 13, 39, 46            | 23    | 36, 5, 12             | 15, 32, 43            | 20                                     | 35, 52, 6             |  |
| 17, 35, 47            | 42    | 2, 20, 32             | 22, 44, 54            | 52                                     | 17, 39, 49            |  |
| 29, 33, 50            | 50    | 22, 26, 43            | 30, 53, $\infty_0$    | 54                                     | 27, 50, $\infty_0$    |  |
| 31, 45, $\infty_1$    | 37    | 11, 25, $\infty_1$    | 37, 41, $\infty_2$    | 14                                     | 51, 55, $\infty_2$    |  |
| C                     |       | R                     |                       | A (1, 2; 3)-frame of type $3^{21}3^1$  |                       |  |
| Starter               | Adder | Starter+ Adder        | Starter               | Adder                                  | Starter + Adder       |  |
| 3, 5, 10              |       | 6, 11, 22             |                       |                                        |                       |  |
| 1, 2, 58              | 3     | 4, 5, 61              | 12, 18, 22            | 1                                      | 13, 19, 23            |  |
| 11, 35, 60            | 4     | 15, 39, 1             | 15, 24, 50            | 2                                      | 17, 26, 52            |  |
| 14, 40, 48            | 6     | 20, 46, 54            | 27, 37, 49            | 7                                      | 34, 44, 56            |  |
| 25, 36, 59            | 11    | 36, 47, 7             | 20, 32, 52            | 40                                     | 60, 9, 29             |  |
| 19, 38, 55            | 43    | 62, 18, 35            | 30, 44, 62            | 60                                     | 27, 41, 59            |  |
| 23, 39, 56            | 9     | 32, 48, 2             | 28, 46, 61            | 45                                     | 10, 28, 43            |  |
| 26, 41, 54            | 25    | 51, 3, 16             | 4, 7, 29              | 26                                     | 30, 33, 55            |  |
| 6, 9, 33              | 44    | 50, 53, 14            | 8, 16, 17             | 41                                     | 49, 57, 58            |  |
| 13, 53, 57            | 18    | 31, 8, 12             | 31, 51, $\infty_0$    | 57                                     | 25, 45, $\infty_0$    |  |
| 34, 47, $\infty_1$    | 53    | 24, 37, $\infty_1$    | 43, 45, $\infty_2$    | 58                                     | 38, 40, $\infty_2$    |  |
| C                     |       | R                     |                       | A (1, 2; 3)-frame of type $3^{23}3^1$  |                       |  |
| Starter               | Adder | Starter+ Adder        | Starter               | Adder                                  | Starter + Adder       |  |
| 17, 31, 48            |       | 19, 33, 53            |                       |                                        |                       |  |
| 12, 39, 43            | 1     | 13, 40, 44            | 11, 16, 18            | 4                                      | 15, 20, 22            |  |
| 10, 25, 34            | 2     | 12, 27, 36            | 9, 50, 57             | 5                                      | 14, 55, 62            |  |
| 6, 60, 65             | 3     | 9, 63, 68             | 30, 38, 54            | 7                                      | 37, 45, 61            |  |
| 26, 55, 66            | 21    | 47, 7, 18             | 21, 40, 51            | 14                                     | 35, 54, 65            |  |
| 15, 37, 59            | 35    | 50, 3, 25             | 14, 20, 47            | 38                                     | 52, 58, 16            |  |
| 33, 49, 67            | 68    | 32, 48, 66            | 29, 41, 62            | 66                                     | 26, 38, 59            |  |
| 27, 52, 53            | 22    | 49, 5, 6              | 1, 3, 4               | 27                                     | 28, 30, 31            |  |
| 2, 58, 61             | 9     | 11, 67, 1             | 5, 22, 35             | 51                                     | 56, 4, 17             |  |
| 7, 56, 64             | 34    | 41, 21, 29            | 8, 36, 68             | 43                                     | 51, 10, 42            |  |
| 13, 19, 45            | 58    | 2, 8, 34              | 24, 42, $\infty_0$    | 15                                     | 39, 57, $\infty_0$    |  |
| 28, 32, $\infty_1$    | 32    | 60, 64, $\infty_1$    | 44, 63, $\infty_2$    | 49                                     | 24, 43, $\infty_2$    |  |
| C                     |       | R                     |                       | A (1, 2; 3)-frame of type $3^{21}15^1$ |                       |  |
| Starter               | Adder | Starter+ Adder        | Starter               | Adder                                  | Starter + Adder       |  |
| 4, 6, 11              |       | 7, 12, 20             |                       |                                        |                       |  |
| 8, 15, 25             |       | 10, 23, 33            |                       |                                        |                       |  |
| 14, 28, 39            |       | 18, 37, 53            |                       |                                        |                       |  |
| 17, 34, 54            |       | 16, 27, 41            |                       |                                        |                       |  |
| 19, 38, 60            |       | 5, 9, 13              |                       |                                        |                       |  |
| 9, 18, 24             | 6     | 15, 24, 30            | 12, 30, 59            | 2                                      | 14, 32, 61            |  |
| 7, 10, 16             | 1     | 8, 11, 17             | 5, 20, 32             | 14                                     | 19, 34, 46            |  |
| 1, 2, 29              | 37    | 38, 39, 3             | 3, 35, $\infty_0$     | 19                                     | 22, 54, $\infty_0$    |  |
| 13, 43, $\infty_1$    | 15    | 28, 58, $\infty_1$    | 22, 52, $\infty_2$    | 40                                     | 62, 29, $\infty_2$    |  |
| 23, 55, $\infty_3$    | 34    | 57, 26, $\infty_3$    | 26, 49, $\infty_4$    | 10                                     | 36, 59, $\infty_4$    |  |
| 27, 51, $\infty_5$    | 16    | 43, 4, $\infty_5$     | 31, 57, $\infty_6$    | 57                                     | 25, 51, $\infty_6$    |  |
| 33, 62, $\infty_7$    | 36    | 6, 35, $\infty_7$     | 36, 56, $\infty_8$    | 9                                      | 45, 2, $\infty_8$     |  |
| 37, 61, $\infty_9$    | 3     | 40, 1, $\infty_9$     | 40, 58, $\infty_{10}$ | 54                                     | 31, 49, $\infty_{10}$ |  |
| 41, 53, $\infty_{11}$ | 7     | 48, 60, $\infty_{11}$ | 44, 45, $\infty_{12}$ | 11                                     | 55, 56, $\infty_{12}$ |  |
| 46, 48, $\infty_{13}$ | 4     | 50, 52, $\infty_{13}$ | 47, 50, $\infty_{14}$ | 60                                     | 44, 47, $\infty_{14}$ |  |

Table A (Cont.) (S,C,R) and A for (1,2;3)-frames of type  $3^u(3\ell)^1$ 

|                       |       |                       |                       |                                      |                       |
|-----------------------|-------|-----------------------|-----------------------|--------------------------------------|-----------------------|
| C                     |       | R                     |                       | A (1,2;3)-frame of type $3^{23}15^1$ |                       |
| 19, 33, 53            |       | 18, 37, 56            |                       |                                      |                       |
| 16, 29, 45            |       | 17, 31, 48            |                       |                                      |                       |
| 10, 21, 32            |       | 14, 24, 40            |                       |                                      |                       |
| 7, 12, 20             |       | 8, 15, 25             |                       |                                      |                       |
| 4, 6, 11              |       | 5, 9, 13              |                       |                                      |                       |
| Starter               | Adder | Starter+ Adder        | Starter               | Adder                                | Starter + Adder       |
| 24, 44, 68            | 3     | 27, 47, 2             | 5, 8, 14              | 2                                    | 7, 10, 16             |
| 9, 15, 18             | 11    | 20, 26, 29            | 1, 2, 26              | 10                                   | 11, 12, 36            |
| 17, 35, 50            | 15    | 32, 50, 65            | 22, 40, 55            | 13                                   | 35, 53, 68            |
| 13, 34, 56            | 8     | 21, 42, 64            | 3, 43, $\infty_0$     | 59                                   | 62, 33, $\infty_0$    |
| 25, 57, $\infty_1$    | 16    | 41, 4, $\infty_1$     | 27, 59, $\infty_2$    | 40                                   | 67, 30, $\infty_2$    |
| 28, 58, $\infty_3$    | 17    | 45, 6, $\infty_3$     | 30, 65, $\infty_4$    | 61                                   | 22, 57, $\infty_4$    |
| 31, 61, $\infty_5$    | 57    | 19, 49, $\infty_5$    | 36, 63, $\infty_6$    | 34                                   | 1, 28, $\infty_6$     |
| 37, 64, $\infty_7$    | 66    | 34, 61, $\infty_7$    | 38, 66, $\infty_8$    | 6                                    | 44, 3, $\infty_8$     |
| 39, 67, $\infty_9$    | 68    | 38, 66, $\infty_9$    | 41, 62, $\infty_{10}$ | 67                                   | 39, 60, $\infty_{10}$ |
| 42, 54, $\infty_{11}$ | 9     | 51, 63, $\infty_{11}$ | 47, 49, $\infty_{12}$ | 5                                    | 52, 54, $\infty_{12}$ |
| 48, 60, $\infty_{13}$ | 64    | 43, 55, $\infty_{13}$ | 51, 52, $\infty_{14}$ | 7                                    | 58, 59, $\infty_{14}$ |
| C                     |       | R                     |                       | A (1,2;3)-frame of type $3^{25}15^1$ |                       |
| 22, 45, 68            |       | 17, 33, 49            |                       |                                      |                       |
| 18, 35, 52            |       | 14, 24, 34            |                       |                                      |                       |
| 16, 30, 44            |       | 19, 38, 57            |                       |                                      |                       |
| 10, 21, 32            |       | 8, 15, 28             |                       |                                      |                       |
| 7, 12, 20             |       | 4, 6, 11              |                       |                                      |                       |
| Starter               | Adder | Starter+ Adder        | Starter               | Adder                                | Starter + Adder       |
| 13, 39, 60            | 3     | 16, 42, 63            | 11, 38, 71            | 1                                    | 12, 39, 72            |
| 6, 15, 24             | 7     | 13, 22, 31            | 28, 40, 64            | 4                                    | 32, 44, 68            |
| 27, 59, 62            | 2     | 29, 61, 64            | 23, 29, 63            | 14                                   | 37, 43, 2             |
| 1, 2, 3               | 44    | 45, 46, 47            | 4, 8, 26              | 22                                   | 26, 30, 48            |
| 5, 9, 53              | 18    | 23, 27, 71            | 14, 56, $\infty_0$    | 37                                   | 51, 18, $\infty_0$    |
| 17, 47, $\infty_1$    | 23    | 40, 70, $\infty_1$    | 19, 49, $\infty_2$    | 61                                   | 5, 35, $\infty_2$     |
| 33, 72, $\infty_3$    | 63    | 21, 60, $\infty_3$    | 34, 42, $\infty_4$    | 20                                   | 54, 62, $\infty_4$    |
| 37, 66, $\infty_5$    | 29    | 66, 20, $\infty_5$    | 41, 65, $\infty_6$    | 17                                   | 58, 7, $\infty_6$     |
| 43, 74, $\infty_7$    | 42    | 10, 41, $\infty_7$    | 48, 51, $\infty_8$    | 8                                    | 56, 59, $\infty_8$    |
| 54, 69, $\infty_9$    | 15    | 69, 9, $\infty_9$     | 55, 61, $\infty_{10}$ | 12                                   | 67, 73, $\infty_{10}$ |
| 58, 70, $\infty_{11}$ | 70    | 53, 65, $\infty_{11}$ | 46, 67, $\infty_{12}$ | 9                                    | 55, 1, $\infty_{12}$  |
| 36, 73, $\infty_{13}$ | 38    | 74, 36, $\infty_{13}$ | 31, 57, $\infty_{14}$ | 21                                   | 52, 3, $\infty_{14}$  |
| C                     |       | R                     |                       | A (1,2;3)-frame of type $3^{27}15^1$ |                       |
| 26, 52, 78            |       | 8, 15, 25             |                       |                                      |                       |
| 19, 38, 57            |       | 16, 30, 44            |                       |                                      |                       |
| 17, 33, 49            |       | 18, 35, 55            |                       |                                      |                       |
| 10, 21, 32            |       | 23, 45, 70            |                       |                                      |                       |
| 5, 9, 13              |       | 22, 42, 65            |                       |                                      |                       |
| Starter               | Adder | Starter+ Adder        | Starter               | Adder                                | Starter + Adder       |
| 16, 28, 61            | 1     | 17, 29, 62            | 8, 14, 20             | 6                                    | 14, 20, 26            |
| 7, 12, 15             | 21    | 28, 33, 36            | 23, 64, 79            | 8                                    | 31, 72, 6             |
| 22, 35, 59            | 2     | 24, 37, 61            | 18, 31, 41            | 16                                   | 34, 47, 57            |
| 30, 48, 80            | 10    | 40, 58, 9             | 29, 47, 68            | 3                                    | 32, 50, 71            |
| 24, 39, 63            | 14    | 38, 53, 77            | 1, 2, 3               | 65                                   | 66, 67, 68            |
| 4, 6, 34              | 45    | 49, 51, 79            | 11, 51, $\infty_0$    | 73                                   | 3, 43, $\infty_0$     |
| 25, 58, $\infty_1$    | 69    | 13, 46, $\infty_1$    | 36, 70, $\infty_2$    | 5                                    | 41, 75, $\infty_2$    |
| 37, 72, $\infty_3$    | 11    | 48, 2, $\infty_3$     | 40, 76, $\infty_4$    | 24                                   | 64, 19, $\infty_4$    |
| 42, 77, $\infty_5$    | 78    | 39, 74, $\infty_5$    | 43, 73, $\infty_6$    | 13                                   | 56, 5, $\infty_6$     |
| 44, 75, $\infty_7$    | 58    | 21, 52, $\infty_7$    | 45, 74, $\infty_8$    | 18                                   | 63, 11, $\infty_8$    |
| 46, 55, $\infty_9$    | 36    | 1, 10, $\infty_9$     | 50, 71, $\infty_{10}$ | 9                                    | 59, 80, $\infty_{10}$ |
| 53, 60, $\infty_{11}$ | 25    | 78, 4, $\infty_{11}$  | 56, 65, $\infty_{12}$ | 4                                    | 60, 69, $\infty_{12}$ |
| 62, 67, $\infty_{13}$ | 26    | 7, 12, $\infty_{13}$  | 66, 69, $\infty_{14}$ | 7                                    | 73, 76, $\infty_{14}$ |
| C                     |       | R                     |                       | A (1,2;3)-frame of type $3^{29}15^1$ |                       |
| 28, 54, 80            |       | 26, 51, 79            |                       |                                      |                       |
| 23, 45, 70            |       | 19, 38, 57            |                       |                                      |                       |
| 18, 35, 55            |       | 16, 30, 44            |                       |                                      |                       |
| 14, 24, 37            |       | 10, 21, 32            |                       |                                      |                       |
| 7, 12, 20             |       | 5, 9, 13              |                       |                                      |                       |
| Starter               | Adder | Starter+ Adder        | Starter               | Adder                                | Starter + Adder       |
| 17, 32, 64            | 1     | 18, 33, 65            | 13, 30, 46            | 4                                    | 17, 34, 50            |
| 11, 26, 38            | 9     | 20, 35, 47            | 25, 59, 68            | 2                                    | 27, 61, 70            |
| 21, 44, 62            | 10    | 31, 54, 72            | 19, 39, 57            | 3                                    | 22, 42, 60            |
| 33, 65, 72            | 6     | 39, 71, 78            | 31, 61, 85            | 5                                    | 36, 66, 3             |
| 27, 48, 83            | 16    | 43, 64, 12            | 1, 2, 3               | 22                                   | 23, 24, 25            |
| 4, 6, 9               | 71    | 75, 77, 80            | 5, 8, 15              | 40                                   | 45, 48, 55            |
| 10, 16, 47            | 36    | 46, 52, 83            | 22, 67, $\infty_0$    | 69                                   | 4, 49, $\infty_0$     |
| 34, 75, $\infty_1$    | 68    | 15, 56, $\infty_1$    | 36, 81, $\infty_2$    | 65                                   | 14, 59, $\infty_2$    |
| 40, 76, $\infty_3$    | 48    | 1, 37, $\infty_3$     | 41, 84, $\infty_4$    | 43                                   | 84, 40, $\infty_4$    |
| 42, 78, $\infty_5$    | 11    | 53, 2, $\infty_5$     | 43, 82, $\infty_6$    | 33                                   | 76, 28, $\infty_6$    |
| 49, 73, $\infty_7$    | 13    | 62, 86, $\infty_7$    | 50, 66, $\infty_8$    | 32                                   | 82, 11, $\infty_8$    |
| 51, 63, $\infty_9$    | 18    | 69, 81, $\infty_9$    | 52, 79, $\infty_{10}$ | 76                                   | 41, 68, $\infty_{10}$ |
| 53, 74, $\infty_{11}$ | 21    | 74, 8, $\infty_{11}$  | 56, 86, $\infty_{12}$ | 7                                    | 63, 6, $\infty_{12}$  |
| 60, 69, $\infty_{13}$ | 25    | 85, 7, $\infty_{13}$  | 71, 77, $\infty_{14}$ | 83                                   | 67, 73, $\infty_{14}$ |

Table A (Cont.) (S, C, R) and A for (1, 2; 3)-frames of type  $3^u(3\ell)^1$ 

| C                      |       | R                      |                       | A (1, 2; 3)-frame of type $3^{33}15^1$ |                       |  |
|------------------------|-------|------------------------|-----------------------|----------------------------------------|-----------------------|--|
| Starter                | Adder | Starter+ Adder         | Starter               |                                        |                       |  |
| 29, 63, 94             |       | 14, 24, 37             |                       |                                        |                       |  |
| 27, 55, 80             |       | 22, 41, 60             |                       |                                        |                       |  |
| 23, 45, 70             |       | 26, 52, 78             |                       |                                        |                       |  |
| 19, 35, 51             |       | 28, 57, 86             |                       |                                        |                       |  |
| 17, 34, 54             |       | 8, 15, 25              |                       |                                        |                       |  |
| Starter                | Adder | Starter+ Adder         | Starter               | Adder                                  | Starter + Adder       |  |
| 10, 18, 53             | 1     | 11, 19, 54             | 7, 11, 16             | 2                                      | 9, 13, 18             |  |
| 5, 8, 12               | 15    | 20, 23, 27             | 15, 26, 75            | 6                                      | 21, 32, 81            |  |
| 14, 20, 32             | 16    | 30, 36, 48             | 13, 21, 36            | 22                                     | 35, 43, 58            |  |
| 28, 68, 86             | 3     | 31, 71, 89             | 25, 38, 76            | 4                                      | 29, 42, 80            |  |
| 22, 31, 43             | 18    | 40, 49, 61             | 40, 67, 97            | 5                                      | 45, 72, 3             |  |
| 39, 59, 95             | 8     | 47, 67, 4              | 30, 62, 83            | 14                                     | 44, 76, 97            |  |
| 44, 74, 98             | 11    | 55, 85, 10             | 42, 57, 92            | 41                                     | 83, 98, 34            |  |
| 41, 65, 96             | 9     | 50, 74, 6              | 1, 2, 3               | 62                                     | 63, 64, 65            |  |
| 4, 6, 46               | 47    | 51, 53, 93             | 9, 60, $\infty_0$     | 95                                     | 5, 56, $\infty_0$     |  |
| 24, 52, $\infty_1$     | 49    | 73, 2, $\infty_1$      | 37, 81, $\infty_2$    | 57                                     | 94, 39, $\infty_2$    |  |
| 47, 84, $\infty_3$     | 32    | 79, 17, $\infty_3$     | 48, 93, $\infty_4$    | 52                                     | 1, 46, $\infty_4$     |  |
| 49, 85, $\infty_5$     | 26    | 75, 12, $\infty_5$     | 50, 89, $\infty_6$    | 87                                     | 38, 77, $\infty_6$    |  |
| 56, 78, $\infty_7$     | 13    | 69, 91, $\infty_7$     | 58, 72, $\infty_8$    | 10                                     | 68, 82, $\infty_8$    |  |
| 61, 88, $\infty_9$     | 27    | 88, 16, $\infty_9$     | 64, 69, $\infty_{10}$ | 23                                     | 87, 92, $\infty_{10}$ |  |
| 71, 82, $\infty_{11}$  | 24    | 95, 7, $\infty_{11}$   | 73, 79, $\infty_{12}$ | 17                                     | 90, 96, $\infty_{12}$ |  |
| 77, 91, $\infty_{13}$  | 92    | 70, 84, $\infty_{13}$  | 87, 90, $\infty_{14}$ | 71                                     | 59, 62, $\infty_{14}$ |  |
| C                      |       | R                      |                       | A (1, 2; 3)-frame of type $3^{37}15^1$ |                       |  |
| Starter                | Adder | Starter+ Adder         | Starter               |                                        |                       |  |
| 33, 65, 100            |       | 10, 21, 32             |                       |                                        |                       |  |
| 28, 56, 87             |       | 16, 29, 45             |                       |                                        |                       |  |
| 17, 31, 48             |       | 30, 59, 91             |                       |                                        |                       |  |
| 26, 51, 73             |       | 27, 55, 80             |                       |                                        |                       |  |
| 22, 41, 60             |       | 18, 38, 52             |                       |                                        |                       |  |
| Starter                | Adder | Starter+ Adder         | Starter               | Adder                                  | Starter + Adder       |  |
| 1, 2, 58               | 104   | 105, 106, 51           | 39, 69, 107           | 10                                     | 49, 79, 6             |  |
| 40, 66, 105            | 52    | 92, 7, 46              | 42, 72, 108           | 36                                     | 78, 108, 33           |  |
| 43, 77, 103            | 91    | 23, 57, 83             | 7, 11, 55             | 1                                      | 8, 12, 56             |  |
| 5, 8, 12               | 12    | 17, 20, 24             | 4, 6, 9               | 5                                      | 9, 11, 14             |  |
| 14, 20, 78             | 8     | 22, 28, 86             | 13, 19, 29            | 6                                      | 19, 25, 35            |  |
| 10, 18, 25             | 16    | 26, 34, 41             | 24, 80, 93            | 7                                      | 31, 87, 100           |  |
| 21, 30, 45             | 18    | 39, 48, 63             | 15, 23, 35            | 27                                     | 42, 50, 62            |  |
| 38, 59, 101            | 2     | 40, 61, 103            | 36, 53, 98            | 73                                     | 109, 15, 60           |  |
| 27, 62, 89             | 26    | 53, 88, 4              | 52, 85, 109           | 103                                    | 44, 77, 101           |  |
| 50, 68, 91             | 22    | 72, 90, 2              | 49, 70, 110           | 44                                     | 93, 3, 43             |  |
| 46, 79, 106            | 101   | 36, 69, 96             | 3, 44, $\infty_0$     | 72                                     | 75, 5, $\infty_0$     |  |
| 16, 75, $\infty_1$     | 83    | 99, 47, $\infty_1$     | 32, 71, $\infty_2$    | 53                                     | 85, 13, $\infty_2$    |  |
| 34, 99, $\infty_3$     | 70    | 104, 58, $\infty_3$    | 47, 83, $\infty_4$    | 29                                     | 76, 1, $\infty_4$     |  |
| 54, 63, $\infty_5$     | 19    | 73, 82, $\infty_5$     | 57, 97, $\infty_6$    | 108                                    | 54, 94, $\infty_6$    |  |
| 61, 104, $\infty_7$    | 3     | 64, 107, $\infty_7$    | 64, 82, $\infty_8$    | 20                                     | 84, 102, $\infty_8$   |  |
| 67, 90, $\infty_9$     | 110   | 66, 89, $\infty_9$     | 76, 81, $\infty_{10}$ | 100                                    | 65, 70, $\infty_{10}$ |  |
| 84, 96, $\infty_{11}$  | 14    | 98, 110, $\infty_{11}$ | 86, 88, $\infty_{12}$ | 9                                      | 95, 97, $\infty_{12}$ |  |
| 92, 102, $\infty_{13}$ | 90    | 71, 81, $\infty_{13}$  | 94, 95, $\infty_{14}$ | 84                                     | 67, 68, $\infty_{14}$ |  |

**Table B**  $(S, C, R)$  and  $A$  for  $(1, 2; 3)$ -frames of type  $6^u(3\ell)^1$ 

| C                   |       | R                  |                      | A (1,2;3)-frame of type $6^{14}6^1$ |                    |  |
|---------------------|-------|--------------------|----------------------|-------------------------------------|--------------------|--|
| 23, 43, 66          |       | 10, 21, 32         |                      |                                     |                    |  |
| 18, 35, 55          |       | 5, 9, 13           |                      |                                     |                    |  |
| Starter             | Adder | Starter+ Adder     | Starter              | Adder                               | Starter + Adder    |  |
| 37, 64, 76          | 1     | 38, 65, 77         | 32, 45, 81           | 2                                   | 34, 47, 83         |  |
| 25, 51, 75          | 4     | 29, 55, 79         | 24, 49, 62           | 9                                   | 33, 58, 71         |  |
| 20, 52, 73          | 5     | 25, 57, 78         | 38, 57, 78           | 3                                   | 41, 60, 81         |  |
| 36, 60, 83          | 7     | 43, 67, 6          | 34, 61, 79           | 12                                  | 46, 73, 7          |  |
| 33, 58, 77          | 52    | 1, 26, 45          | 31, 53, 82           | 71                                  | 18, 40, 69         |  |
| 1, 2, 3             | 73    | 74, 75, 76         | 4, 6, 9              | 44                                  | 48, 50, 53         |  |
| 5, 8, 13            | 31    | 36, 39, 44         | 7, 17, 48            | 13                                  | 20, 30, 61         |  |
| 10, 19, 26          | 77    | 3, 12, 19          | 11, 27, 65           | 81                                  | 8, 24, 62          |  |
| 12, 41, 47          | 74    | 2, 31, 37          | 15, 21, 69           | 67                                  | 82, 4, 52          |  |
| 16, 67, 74          | 33    | 49, 16, 23         | 22, 39, 54           | 41                                  | 63, 80, 11         |  |
| 29, 44, $\infty_0$  | 22    | 51, 66, $\infty_0$ | 30, 40, $\infty_1$   | 24                                  | 54, 64, $\infty_1$ |  |
| 46, 80, $\infty_2$  | 26    | 72, 22, $\infty_2$ | 50, 68, $\infty_3$   | 51                                  | 17, 35, $\infty_3$ |  |
| 59, 71, $\infty_4$  | 40    | 15, 27, $\infty_4$ | 63, 72, $\infty_5$   | 80                                  | 59, 68, $\infty_5$ |  |
| C                   |       | R                  |                      | A (1,2;3)-frame of type $6^{16}6^1$ |                    |  |
| 14, 24, 37          |       | 27, 56, 85         |                      |                                     |                    |  |
| 23, 45, 67          |       | 30, 58, 92         |                      |                                     |                    |  |
| Starter             | Adder | Starter+ Adder     | Starter              | Adder                               | Starter + Adder    |  |
| 38, 51, 71          | 1     | 39, 52, 72         | 34, 65, 84           | 2                                   | 36, 67, 86         |  |
| 25, 50, 86          | 3     | 28, 53, 89         | 22, 58, 85           | 12                                  | 34, 70, 1          |  |
| 19, 30, 87          | 7     | 26, 37, 94         | 47, 72, 89           | 4                                   | 51, 76, 93         |  |
| 44, 62, 93          | 6     | 50, 68, 3          | 31, 49, 90           | 10                                  | 41, 59, 4          |  |
| 29, 59, 74          | 14    | 43, 73, 88         | 27, 41, 81           | 20                                  | 47, 61, 5          |  |
| 43, 66, 92          | 11    | 54, 77, 7          | 42, 69, 95           | 36                                  | 78, 9, 35          |  |
| 40, 70, 91          | 71    | 15, 45, 66         | 36, 55, 76           | 19                                  | 55, 74, 95         |  |
| 33, 53, 77          | 65    | 2, 22, 46          | 1, 2, 3              | 18                                  | 19, 20, 21         |  |
| 4, 6, 9             | 56    | 60, 62, 65         | 5, 8, 15             | 76                                  | 81, 84, 91         |  |
| 7, 13, 94           | 31    | 38, 44, 29         | 10, 56, 68           | 15                                  | 25, 71, 83         |  |
| 11, 28, 35          | 79    | 90, 11, 18         | 12, 18, 26           | 5                                   | 17, 23, 31         |  |
| 17, 21, 78          | 58    | 75, 79, 40         | 20, 75, 79           | 29                                  | 49, 8, 12          |  |
| 39, 82, $\infty_0$  | 24    | 63, 10, $\infty_0$ | 46, 57, $\infty_1$   | 63                                  | 13, 24, $\infty_1$ |  |
| 52, 60, $\infty_2$  | 50    | 6, 14, $\infty_2$  | 54, 63, $\infty_3$   | 75                                  | 33, 42, $\infty_3$ |  |
| 61, 73, $\infty_4$  | 92    | 57, 69, $\infty_4$ | 83, 88, $\infty_5$   | 95                                  | 82, 87, $\infty_5$ |  |
| C                   |       | R                  |                      | A (1,2;3)-frame of type $6^{17}6^1$ |                    |  |
| 31, 63, 98          |       | 19, 33, 47         |                      |                                     |                    |  |
| 27, 52, 80          |       | 23, 43, 66         |                      |                                     |                    |  |
| Starter             | Adder | Starter+ Adder     | Starter              | Adder                               | Starter + Adder    |  |
| 14, 20, 30          | 93    | 5, 11, 21          | 13, 28, 93           | 16                                  | 29, 44, 7          |  |
| 10, 19, 69          | 82    | 92, 101, 49        | 7, 11, 16            | 25                                  | 32, 36, 41         |  |
| 5, 8, 12            | 76    | 81, 84, 88         | 43, 54, 84           | 2                                   | 45, 56, 86         |  |
| 36, 49, 61          | 1     | 37, 50, 62         | 35, 53, 92           | 4                                   | 39, 57, 96         |  |
| 24, 64, 76          | 3     | 27, 67, 79         | 22, 48, 87           | 6                                   | 28, 54, 93         |  |
| 46, 66, 82          | 7     | 53, 73, 89         | 38, 57, 86           | 8                                   | 46, 65, 94         |  |
| 37, 70, 94          | 50    | 87, 18, 42         | 29, 50, 91           | 74                                  | 1, 22, 63          |  |
| 26, 39, 58          | 32    | 58, 71, 90         | 45, 72, 101          | 70                                  | 13, 40, 69         |  |
| 44, 75, 99          | 33    | 77, 6, 30          | 42, 73, 96           | 84                                  | 24, 55, 78         |  |
| 41, 71, 97          | 20    | 61, 91, 15         | 40, 62, 95           | 71                                  | 9, 31, 64          |  |
| 1, 2, 3             | 97    | 98, 99, 100        | 4, 6, 9              | 66                                  | 70, 72, 75         |  |
| 15, 21, 79          | 61    | 76, 82, 38         | 18, 33, 60           | 62                                  | 80, 95, 20         |  |
| 23, 59, 67          | 95    | 16, 52, 60         | 25, 78, 89           | 72                                  | 97, 48, 59         |  |
| 32, 74, $\infty_0$  | 42    | 74, 14, $\infty_0$ | 47, 55, $\infty_1$   | 59                                  | 4, 12, $\infty_1$  |  |
| 56, 77, $\infty_2$  | 27    | 83, 2, $\infty_2$  | 65, 83, $\infty_3$   | 45                                  | 8, 26, $\infty_3$  |  |
| 81, 88, $\infty_4$  | 24    | 3, 10, $\infty_4$  | 90, 100, $\infty_5$  | 37                                  | 25, 35, $\infty_5$ |  |
| C                   |       | R                  |                      | A (1,2;3)-frame of type $6^{19}6^1$ |                    |  |
| 34, 68, 102         |       | 29, 60, 91         |                      |                                     |                    |  |
| 26, 51, 79          |       | 16, 30, 44         |                      |                                     |                    |  |
| Starter             | Adder | Starter+ Adder     | Starter              | Adder                               | Starter + Adder    |  |
| 42, 87, 109         | 83    | 11, 56, 78         | 45, 74, 110          | 36                                  | 81, 110, 32        |  |
| 55, 77, 107         | 99    | 40, 62, 92         | 7, 13, 25            | 75                                  | 82, 88, 100        |  |
| 20, 35, 59          | 104   | 10, 25, 49         | 12, 75, 82           | 73                                  | 85, 34, 41         |  |
| 54, 80, 113         | 54    | 108, 20, 53        | 1, 2, 3              | 67                                  | 68, 69, 70         |  |
| 43, 69, 111         | 24    | 67, 93, 21         | 48, 61, 93           | 18                                  | 66, 79, 111        |  |
| 28, 39, 71          | 58    | 86, 97, 15         | 22, 63, 78           | 42                                  | 64, 105, 6         |  |
| 27, 67, 91          | 69    | 96, 22, 46         | 11, 15, 18           | 101                                 | 112, 2, 5          |  |
| 46, 83, 112         | 1     | 47, 84, 113        | 4, 6, 9              | 100                                 | 104, 106, 109      |  |
| 44, 65, 100         | 103   | 33, 54, 89         | 32, 86, 103          | 4                                   | 36, 90, 107        |  |
| 31, 81, 98          | 20    | 51, 101, 4         | 40, 49, 60           | 12                                  | 52, 61, 72         |  |
| 47, 72, 108         | 30    | 77, 102, 24        | 5, 10, 23            | 32                                  | 37, 42, 55         |  |
| 36, 73, 96          | 7     | 43, 80, 103        | 8, 52, 92            | 23                                  | 31, 75, 1          |  |
| 41, 64, 106         | 53    | 94, 3, 45          | 37, 58, 85           | 13                                  | 50, 71, 98         |  |
| 33, 53, 88          | 89    | 8, 28, 63          | 14, 24, 30           | 107                                 | 7, 17, 23          |  |
| 16, 89, 97          | 43    | 59, 18, 26         | 17, 29, 56           | 70                                  | 87, 99, 12         |  |
| 21, 84, $\infty_0$  | 44    | 65, 14, $\infty_0$ | 50, 66, $\infty_1$   | 8                                   | 58, 74, $\infty_1$ |  |
| 62, 70, $\infty_2$  | 79    | 27, 35, $\infty_2$ | 90, 99, $\infty_3$   | 63                                  | 39, 48, $\infty_3$ |  |
| 94, 104, $\infty_4$ | 93    | 73, 83, $\infty_4$ | 101, 105, $\infty_5$ | 22                                  | 9, 13, $\infty_5$  |  |

Table B (Cont.) (S, C, R) and A for (1, 2; 3)-frames of type  $6^u(3\ell)^1$ 

| C                                   |       | R                                     |                      | A (1, 2; 3)-frame of type $6^{22}6^1$ |                     |  |
|-------------------------------------|-------|---------------------------------------|----------------------|---------------------------------------|---------------------|--|
| 45, 86, 127<br>29, 58, 87           |       | 36, 70, 113<br>16, 27, 41             |                      |                                       |                     |  |
| Starter                             | Adder | Starter+ Adder                        | Starter              | Adder                                 | Starter + Adder     |  |
| 23, 30, 125                         | 119   | 10, 17, 112                           | 32, 47, 129          | 8                                     | 40, 55, 5           |  |
| 34, 79, 97                          | 23    | 57, 102, 120                          | 43, 53, 69           | 100                                   | 11, 21, 37          |  |
| 40, 72, 114                         | 93    | 1, 33, 75                             | 1, 4, 131            | 105                                   | 106, 109, 104       |  |
| 2, 15, 98                           | 41    | 43, 56, 7                             | 3, 73, 101           | 78                                    | 81, 19, 47          |  |
| 56, 111, 113                        | 104   | 28, 83, 85                            | 10, 107, 130         | 20                                    | 30, 127, 18         |  |
| 37, 61, 85                          | 129   | 34, 58, 82                            | 35, 42, 62           | 25                                    | 60, 67, 87          |  |
| 60, 93, 120                         | 26    | 86, 119, 14                           | 7, 78, 116           | 107                                   | 114, 53, 91         |  |
| 8, 11, 17                           | 51    | 59, 62, 68                            | 59, 90, 108          | 96                                    | 23, 54, 72          |  |
| 18, 57, 83                          | 113   | 131, 38, 64                           | 9, 94, 95            | 127                                   | 4, 89, 90           |  |
| 28, 64, 123                         | 116   | 12, 48, 107                           | 6, 51, 91            | 67                                    | 73, 118, 26         |  |
| 39, 109, 128                        | 128   | 35, 105, 124                          | 50, 71, 122          | 90                                    | 8, 29, 80           |  |
| 46, 67, 77                          | 31    | 77, 98, 108                           | 41, 102, 119         | 33                                    | 74, 3, 20           |  |
| 31, 99, 124                         | 1     | 32, 100, 125                          | 20, 48, 100          | 74                                    | 94, 122, 42         |  |
| 54, 65, 118                         | 130   | 52, 63, 116                           | 55, 70, 112          | 14                                    | 69, 84, 126         |  |
| 49, 81, 82                          | 47    | 96, 128, 129                          | 5, 14, 68            | 10                                    | 15, 24, 78          |  |
| 13, 19, 27                          | 12    | 25, 31, 39                            | 12, 16, 24           | 87                                    | 99, 103, 111        |  |
| 21, 26, 74                          | 71    | 92, 97, 13                            | 25, 63, 76           | 54                                    | 79, 117, 130        |  |
| 33, 89, 106                         | 32    | 65, 121, 6                            | 36, 52, 92           | 9                                     | 45, 61, 101         |  |
| 38, 103, $\infty_0$                 | 38    | 76, $9, \infty_0$                     | 75, 105, $\infty_1$  | 18                                    | 93, 123, $\infty_1$ |  |
| 80, 126, $\infty_2$                 | 101   | 49, $95, \infty_2$                    | 84, 104, $\infty_3$  | 99                                    | 51, 71, $\infty_3$  |  |
| 96, 115, $\infty_4$                 | 19    | 115, $2, \infty_4$                    | 117, 121, $\infty_5$ | 61                                    | 46, 50, $\infty_5$  |  |
| C                                   |       | R                                     |                      | A (1, 2; 3)-frame of type $6^{22}6^1$ |                     |  |
| 43, 87, 131<br>36, 76, 110          |       | 39, 79, 122<br>30, 58, 89             |                      |                                       |                     |  |
| Starter                             | Adder | Starter+ Adder                        | Starter              | Adder                                 | Starter + Adder     |  |
| 6, 84, 103                          | 62    | 68, 8, 27                             | 31, 104, 120         | 93                                    | 124, 59, 75         |  |
| 15, 89, 101                         | 17    | 32, 106, 118                          | 34, 53, 134          | 121                                   | 17, 36, 117         |  |
| 64, 99, 119                         | 83    | 9, 44, 64                             | 12, 111, 118         | 136                                   | 10, 109, 116        |  |
| 39, 60, 81                          | 61    | 100, 121, 4                           | 28, 59, 95           | 105                                   | 133, 26, 62         |  |
| 40, 83, 121                         | 14    | 54, 97, 135                           | 14, 20, 29           | 129                                   | 5, 11, 20           |  |
| 56, 67, 85                          | 26    | 82, 93, 111                           | 58, 62, 130          | 29                                    | 87, 91, 21          |  |
| 24, 54, 80                          | 96    | 120, 12, 38                           | 7, 8, 10             | 40                                    | 47, 48, 50          |  |
| 18, 26, 38                          | 35    | 53, 61, 73                            | 44, 96, 128          | 82                                    | 126, 40, 72         |  |
| 30, 47, 63                          | 13    | 43, 60, 76                            | 50, 68, 117          | 95                                    | 7, 25, 74           |  |
| 35, 48, 57                          | 84    | 119, 132, 3                           | 32, 109, 123         | 119                                   | 13, 90, 104         |  |
| 22, 33, 112                         | 134   | 18, 29, 108                           | 51, 78, 79           | 20                                    | 71, 98, 99          |  |
| 21, 45, 105                         | 7     | 28, 52, 112                           | 65, 82, 133          | 72                                    | 137, 16, 67         |  |
| 70, 107, 132                        | 37    | 107, 6, 31                            | 9, 16, 19            | 47                                    | 56, 63, 66          |  |
| 25, 61, 122                         | 111   | 136, 34, 95                           | 55, 106, 135         | 116                                   | 33, 84, 113         |  |
| 3, 75, 137                          | 78    | 81, 15, 77                            | 72, 77, 114          | 11                                    | 83, 88, 125         |  |
| 5, 11, 13                           | 118   | 123, 129, 131                         | 17, 27, 90           | 38                                    | 55, 65, 128         |  |
| 2, 37, 52                           | 49    | 51, 86, 101                           | 1, 86, 125           | 109                                   | 110, 57, 96         |  |
| 4, 49, 94                           | 81    | 85, 130, 37                           | 66, 88, 113          | 74                                    | 2, 24, 49           |  |
| 41, 71, 97                          | 86    | 127, 19, 45                           | 42, 100, 127         | 52                                    | 94, 14, 41          |  |
| 73, 136, $\infty_0$                 | 107   | 42, $105, \infty_0$                   | 74, 108, $\infty_1$  | 6                                     | 80, 114, $\infty_1$ |  |
| 91, 124, $\infty_2$                 | 117   | 70, $103, \infty_2$                   | 93, 98, $\infty_3$   | 41                                    | 134, $1, \infty_3$  |  |
| 102, 126, $\infty_4$                | 114   | 78, $102, \infty_4$                   | 116, 129, $\infty_5$ | 44                                    | 22, 35, $\infty_5$  |  |
| C                                   |       | R                                     |                      | A (1, 2; 3)-frame of type $6^8 9^1$   |                     |  |
| 4, 6, 11<br>7, 12, 26<br>13, 23, 36 |       | 5, 9, 19<br>10, 14, 21<br>15, 35, 46  |                      |                                       |                     |  |
| Starter                             | Adder | Starter+ Adder                        | Starter              | Adder                                 | Starter + Adder     |  |
| 1, 2, 3                             | 1     | 2, 3, 4                               | 5, 14, 17            | 12                                    | 17, 26, 29          |  |
| 9, 15, 30                           | 13    | 22, 28, 43                            | 10, 22, 37           | 23                                    | 33, 45, 12          |  |
| 18, 35, 44                          | 43    | 13, 30, 39                            | 19, 38, $\infty_0$   | 6                                     | 25, 44, $\infty_0$  |  |
| 20, 43, $\infty_1$                  | 11    | 31, $6, \infty_1$                     | 21, 41, $\infty_2$   | 45                                    | 18, 38, $\infty_2$  |  |
| 25, 47, $\infty_3$                  | 2     | 27, $1, \infty_3$                     | 27, 45, $\infty_4$   | 14                                    | 41, 11, $\infty_4$  |  |
| 28, 46, $\infty_5$                  | 9     | 37, $7, \infty_5$                     | 29, 42, $\infty_6$   | 5                                     | 34, 47, $\infty_6$  |  |
| 31, 34, $\infty_7$                  | 37    | 20, $23, \infty_7$                    | 33, 39, $\infty_8$   | 3                                     | 36, 42, $\infty_8$  |  |
| C                                   |       | R                                     |                      | A (1, 2; 3)-frame of type $6^9 9^1$   |                     |  |
| 4, 6, 11<br>7, 14, 24<br>15, 26, 34 |       | 8, 12, 16<br>19, 33, 50<br>13, 23, 39 |                      |                                       |                     |  |
| Starter                             | Adder | Starter+ Adder                        | Starter              | Adder                                 | Starter + Adder     |  |
| 1, 2, 3                             | 1     | 2, 3, 4                               | 5, 8, 19             | 2                                     | 7, 10, 21           |  |
| 10, 13, 25                          | 15    | 25, 28, 40                            | 12, 28, 41           | 14                                    | 26, 42, 1           |  |
| 16, 37, 49                          | 49    | 11, 32, 44                            | 17, 40, 46           | 13                                    | 30, 53, 5           |  |
| 20, 39, 44                          | 4     | 24, 43, 48                            | 21, 43, $\infty_0$   | 17                                    | 38, $6, \infty_0$   |  |
| 22, 48, $\infty_1$                  | 47    | 15, 41, $\infty_1$                    | 23, 47, $\infty_2$   | 29                                    | 52, 22, $\infty_2$  |  |
| 29, 42, $\infty_3$                  | 5     | 34, 47, $\infty_3$                    | 30, 52, $\infty_4$   | 16                                    | 46, 14, $\infty_4$  |  |
| 31, 51, $\infty_5$                  | 20    | 51, 17, $\infty_5$                    | 32, 38, $\infty_6$   | 53                                    | 31, 37, $\infty_6$  |  |
| 33, 53, $\infty_7$                  | 50    | 29, 49, $\infty_7$                    | 35, 50, $\infty_8$   | 39                                    | 20, 35, $\infty_8$  |  |

Table B (Cont.) (S, C, R) and A for (1, 2; 3)-frames of type  $6^u(3\ell)^1$ 

|                         |       |                         |                                        |       |                         |
|-------------------------|-------|-------------------------|----------------------------------------|-------|-------------------------|
| C                       |       | R                       | A (1, 2; 3)-frame of type $6^{22}30^1$ |       |                         |
| 45, 86, 127             |       | 40, 80, 120             |                                        |       |                         |
| 36, 70, 113             |       | 34, 65, 102             |                                        |       |                         |
| 32, 67, 105             |       | 31, 63, 98              |                                        |       |                         |
| 30, 64, 95              |       | 29, 58, 87              |                                        |       |                         |
| 28, 56, 84              |       | 26, 52, 78              |                                        |       |                         |
| 23, 42, 61              |       | 19, 39, 62              |                                        |       |                         |
| 18, 38, 55              |       | 17, 33, 49              |                                        |       |                         |
| 10, 21, 35              |       | 14, 24, 37              |                                        |       |                         |
| 16, 27, 41              |       | 7, 12, 20               |                                        |       |                         |
| 5, 9, 13                |       | 8, 15, 25               |                                        |       |                         |
| Starter                 | Adder | Starter+ Adder          | Starter                                | Adder | Starter + Adder         |
| 37, 90, 108             | 16    | 53, 106, 124            | 34, 80, 116                            | 12    | 46, 92, 128             |
| 33, 54, 102             | 17    | 50, 71, 119             | 31, 73, 103                            | 4     | 35, 77, 107             |
| 29, 53, 104             | 14    | 43, 67, 118             | 1, 2, 57                               | 2     | 3, 4, 59                |
| 4, 6, 11                | 5     | 9, 11, 16               | 7, 19, 78                              | 11    | 18, 30, 89              |
| 8, 14, 17               | 24    | 32, 38, 41              | 12, 15, 24                             | 30    | 42, 45, 54              |
| 20, 62, 83              | 7     | 27, 69, 90              | 26, 50, 65                             | 10    | 36, 60, 75              |
| 3, 71, $\infty_0$       | 3     | 6, 74, $\infty_0$       | 25, 79, $\infty_1$                     | 26    | 51, 105, $\infty_1$     |
| 43, 100, $\infty_2$     | 13    | 56, 113, $\infty_2$     | 47, 107, $\infty_3$                    | 1     | 48, 108, $\infty_3$     |
| 49, 111, $\infty_4$     | 6     | 55, 117, $\infty_4$     | 52, 97, $\infty_5$                     | 18    | 70, 115, $\infty_5$     |
| 59, 112, $\infty_6$     | 9     | 68, 121, $\infty_6$     | 74, 89, $\infty_7$                     | 8     | 82, 97, $\infty_7$      |
| 81, 128, $\infty_8$     | 61    | 10, 57, $\infty_8$      | 82, 109, $\infty_9$                    | 21    | 103, 130, $\infty_9$    |
| 85, 115, $\infty_{10}$  | 111   | 64, 94, $\infty_{10}$   | 87, 114, $\infty_{11}$                 | 129   | 84, 111, $\infty_{11}$  |
| 92, 131, $\infty_{12}$  | 126   | 86, 125, $\infty_{12}$  | 93, 99, $\infty_{13}$                  | 34    | 127, 1, $\infty_{13}$   |
| 96, 129, $\infty_{14}$  | 119   | 83, 116, $\infty_{14}$  | 101, 119, $\infty_{15}$                | 122   | 91, 109, $\infty_{15}$  |
| 117, 118, $\infty_{16}$ | 114   | 99, 100, $\infty_{16}$  | 123, 125, $\infty_{17}$                | 121   | 112, 114, $\infty_{17}$ |
| 40, 76, $\infty_{18}$   | 53    | 93, 129, $\infty_{18}$  | 48, 94, $\infty_{19}$                  | 37    | 85, 131, $\infty_{19}$  |
| 60, 130, $\infty_{20}$  | 74    | 2, 72, $\infty_{20}$    | 77, 126, $\infty_{21}$                 | 102   | 47, 96, $\infty_{21}$   |
| 75, 124, $\infty_{22}$  | 130   | 73, 122, $\infty_{22}$  | 69, 120, $\infty_{23}$                 | 91    | 28, 79, $\infty_{23}$   |
| 68, 122, $\infty_{24}$  | 33    | 101, 23, $\infty_{24}$  | 63, 121, $\infty_{25}$                 | 32    | 95, 21, $\infty_{25}$   |
| 58, 106, $\infty_{26}$  | 87    | 13, 61, $\infty_{26}$   | 51, 98, $\infty_{27}$                  | 25    | 76, 123, $\infty_{27}$  |
| 46, 91, $\infty_{28}$   | 35    | 81, 126, $\infty_{28}$  | 39, 72, $\infty_{29}$                  | 65    | 104, 5, $\infty_{29}$   |
| C                       |       | R                       | A (1, 2; 3)-frame of type $6^{23}30^1$ |       |                         |
| 43, 87, 131             |       | 41, 82, 123             |                                        |       |                         |
| 39, 79, 122             |       | 38, 75, 112             |                                        |       |                         |
| 36, 76, 110             |       | 35, 70, 108             |                                        |       |                         |
| 34, 66, 101             |       | 30, 58, 89              |                                        |       |                         |
| 28, 54, 86              |       | 27, 52, 80              |                                        |       |                         |
| 26, 51, 73              |       | 4, 6, 11                |                                        |       |                         |
| 19, 33, 53              |       | 16, 29, 45              |                                        |       |                         |
| 17, 31, 48              |       | 22, 42, 71              |                                        |       |                         |
| 14, 24, 40              |       | 18, 37, 56              |                                        |       |                         |
| 7, 12, 20               |       | 8, 15, 25               |                                        |       |                         |
| Starter                 | Adder | Starter+ Adder          | Starter                                | Adder | Starter + Adder         |
| 22, 84, 99              | 102   | 124, 48, 63             | 21, 30, 91                             | 36    | 57, 66, 127             |
| 11, 41, 62              | 44    | 55, 85, 106             | 10, 13, 37                             | 41    | 51, 54, 78              |
| 6, 15, 18               | 13    | 19, 28, 31              | 38, 83, 116                            | 1     | 39, 84, 117             |
| 32, 65, 117             | 2     | 34, 67, 119             | 29, 35, 100                            | 14    | 43, 49, 114             |
| 47, 95, 113             | 3     | 50, 98, 116             | 44, 55, 112                            | 9     | 53, 64, 121             |
| 42, 63, 129             | 5     | 47, 68, 134             | 1, 2, 3                                | 11    | 12, 13, 14              |
| 4, 8, 16                | 16    | 20, 24, 32              | 5, 9, 27                               | 72    | 77, 81, 99              |
| 49, 94, $\infty_0$      | 53    | 102, 9, $\infty_0$      | 56, 104, $\infty_1$                    | 122   | 40, 88, $\infty_1$      |
| 60, 109, $\infty_2$     | 27    | 87, 136, $\infty_2$     | 61, 111, $\infty_3$                    | 113   | 36, 86, $\infty_3$      |
| 64, 120, $\infty_4$     | 77    | 3, 59, $\infty_4$       | 70, 133, $\infty_5$                    | 6     | 76, 1, $\infty_5$       |
| 74, 137, $\infty_6$     | 126   | 62, 125, $\infty_6$     | 77, 136, $\infty_7$                    | 133   | 72, 131, $\infty_7$     |
| 75, 135, $\infty_8$     | 68    | 5, 65, $\infty_8$       | 72, 127, $\infty_9$                    | 28    | 100, 17, $\infty_9$     |
| 82, 106, $\infty_{10}$  | 29    | 111, 135, $\infty_{10}$ | 80, 119, $\infty_{11}$                 | 137   | 79, 118, $\infty_{11}$  |
| 68, 125, $\infty_{12}$  | 39    | 107, 26, $\infty_{12}$  | 78, 132, $\infty_{13}$                 | 50    | 128, 44, $\infty_{13}$  |
| 57, 96, $\infty_{14}$   | 33    | 90, 129, $\infty_{14}$  | 71, 118, $\infty_{15}$                 | 30    | 101, 10, $\infty_{15}$  |
| 52, 58, $\infty_{16}$   | 45    | 97, 103, $\infty_{16}$  | 93, 108, $\infty_{17}$                 | 37    | 130, 7, $\infty_{17}$   |
| 59, 89, $\infty_{18}$   | 51    | 110, 2, $\infty_{18}$   | 88, 130, $\infty_{19}$                 | 7     | 95, 137, $\infty_{19}$  |
| 103, 114, $\infty_{20}$ | 118   | 83, 94, $\infty_{20}$   | 81, 123, $\infty_{21}$                 | 10    | 91, 133, $\infty_{21}$  |
| 50, 102, $\infty_{22}$  | 24    | 74, 126, $\infty_{22}$  | 98, 134, $\infty_{23}$                 | 136   | 96, 132, $\infty_{23}$  |
| 97, 124, $\infty_{24}$  | 134   | 93, 120, $\infty_{24}$  | 90, 126, $\infty_{25}$                 | 121   | 73, 109, $\infty_{25}$  |
| 85, 128, $\infty_{26}$  | 114   | 61, 104, $\infty_{26}$  | 67, 121, $\infty_{27}$                 | 38    | 105, 21, $\infty_{27}$  |
| 45, 107, $\infty_{28}$  | 15    | 60, 122, $\infty_{28}$  | 25, 105, $\infty_{29}$                 | 8     | 33, 113, $\infty_{29}$  |

Table B (Cont.) (S,C,R) and A for (1,2;3)-frames of type  $6^u(3\ell)^1$ 

| C                       |       | R                       |                         | A (1,2;3)-frame of type $6^{27}30^1$ |                         |  |
|-------------------------|-------|-------------------------|-------------------------|--------------------------------------|-------------------------|--|
| 53, 105, 157            |       | 52, 102, 155            |                         |                                      |                         |  |
| 50, 99, 148             |       | 48, 95, 139             |                         |                                      |                         |  |
| 46, 92, 138             |       | 43, 83, 126             |                         |                                      |                         |  |
| 40, 77, 117             |       | 36, 71, 109             |                         |                                      |                         |  |
| 34, 66, 101             |       | 29, 58, 84              |                         |                                      |                         |  |
| 28, 59, 90              |       | 4, 6, 11                |                         |                                      |                         |  |
| 22, 42, 65              |       | 47, 91, 141             |                         |                                      |                         |  |
| 17, 33, 49              |       | 39, 73, 107             |                         |                                      |                         |  |
| 8, 15, 25               |       | 23, 45, 70              |                         |                                      |                         |  |
| 14, 24, 37              |       | 18, 35, 55              |                         |                                      |                         |  |
| Starter                 | Adder | Starter+ Adder          | Starter                 | Adder                                | Starter + Adder         |  |
| 47, 71, 145             | 3     | 50, 74, 148             | 44, 113, 132            | 2                                    | 46, 115, 134            |  |
| 39, 84, 114             | 5     | 44, 89, 119             | 52, 127, 152            | 1                                    | 53, 128, 153            |  |
| 51, 79, 120             | 9     | 60, 88, 129             | 48, 119, 155            | 8                                    | 56, 127, 1              |  |
| 64, 106, 136            | 4     | 68, 110, 140            | 63, 111, 139            | 6                                    | 69, 117, 145            |  |
| 61, 100, 151            | 14    | 75, 114, 3              | 60, 102, 159            | 16                                   | 76, 118, 13             |  |
| 57, 96, 137             | 7     | 64, 103, 144            | 1, 2, 3                 | 13                                   | 14, 15, 16              |  |
| 4, 7, 10                | 15    | 19, 22, 25              | 5, 9, 13                | 19                                   | 24, 28, 32              |  |
| 6, 11, 19               | 114   | 120, 125, 133           | 12, 18, 30              | 68                                   | 80, 86, 98              |  |
| 16, 31, 45              | 143   | 159, 12, 26             | 20, 29, 38              | 123                                  | 143, 152, 161           |  |
| 21, 32, 43              | 80    | 101, 112, 123           | 23, 68, 129             | 90                                   | 113, 158, 57            |  |
| 26, 104, 128            | 67    | 93, 9, 33               | 35, 115, 130            | 129                                  | 2, 82, 97               |  |
| 72, 125, $\infty_0$     | 32    | 104, 157, $\infty_0$    | 70, 126, $\infty_1$     | 20                                   | 90, 146, $\infty_1$     |  |
| 83, 160, $\infty_2$     | 144   | 65, 142, $\infty_2$     | 94, 142, $\infty_3$     | 62                                   | 156, 42, $\infty_3$     |  |
| 58, 147, $\infty_4$     | 109   | 5, 94, $\infty_4$       | 76, 146, $\infty_5$     | 75                                   | 151, 59, $\infty_5$     |  |
| 91, 149, $\infty_6$     | 105   | 34, 92, $\infty_6$      | 78, 141, $\infty_7$     | 151                                  | 67, 130, $\infty_7$     |  |
| 80, 140, $\infty_8$     | 159   | 77, 137, $\infty_8$     | 86, 124, $\infty_9$     | 116                                  | 40, 78, $\infty_9$      |  |
| 85, 144, $\infty_{10}$  | 140   | 63, 122, $\infty_{10}$  | 95, 161, $\infty_{11}$  | 139                                  | 72, 138, $\infty_{11}$  |  |
| 89, 150, $\infty_{12}$  | 22    | 111, 10, $\infty_{12}$  | 107, 133, $\infty_{13}$ | 161                                  | 106, 132, $\infty_{13}$ |  |
| 110, 143, $\infty_{14}$ | 50    | 160, 31, $\infty_{14}$  | 73, 109, $\infty_{15}$  | 138                                  | 49, 85, $\infty_{15}$   |  |
| 88, 154, $\infty_{16}$  | 28    | 116, 20, $\infty_{16}$  | 74, 131, $\infty_{17}$  | 118                                  | 30, 87, $\infty_{17}$   |  |
| 55, 134, $\infty_{18}$  | 124   | 17, 96, $\infty_{18}$   | 67, 118, $\infty_{19}$  | 82                                   | 149, 38, $\infty_{19}$  |  |
| 123, 156, $\infty_{20}$ | 160   | 121, 154, $\infty_{20}$ | 98, 112, $\infty_{21}$  | 101                                  | 37, 51, $\infty_{21}$   |  |
| 97, 116, $\infty_{22}$  | 53    | 150, 7, $\infty_{22}$   | 93, 158, $\infty_{23}$  | 12                                   | 105, 8, $\infty_{23}$   |  |
| 82, 103, $\infty_{24}$  | 121   | 41, 62, $\infty_{24}$   | 75, 87, $\infty_{25}$   | 49                                   | 124, 136, $\infty_{25}$ |  |
| 69, 153, $\infty_{26}$  | 30    | 99, 21, $\infty_{26}$   | 56, 121, $\infty_{27}$  | 10                                   | 66, 131, $\infty_{27}$  |  |
| 41, 62, $\infty_{28}$   | 38    | 79, 100, $\infty_{28}$  | 36, 122, $\infty_{29}$  | 25                                   | 61, 147, $\infty_{29}$  |  |
| C                       |       | R                       |                         | A (1,2;3)-frame of type $6^{29}30^1$ |                         |  |
| 60, 112, 167            |       | 56, 111, 163            |                         |                                      |                         |  |
| 52, 108, 164            |       | 48, 97, 146             |                         |                                      |                         |  |
| 47, 91, 141             |       | 43, 90, 134             |                         |                                      |                         |  |
| 41, 81, 124             |       | 31, 62, 93              |                         |                                      |                         |  |
| 36, 73, 107             |       | 26, 51, 79              |                         |                                      |                         |  |
| 28, 54, 89              |       | 19, 38, 57              |                         |                                      |                         |  |
| 23, 45, 70              |       | 16, 30, 44              |                         |                                      |                         |  |
| 18, 35, 55              |       | 8, 15, 25               |                         |                                      |                         |  |
| 14, 24, 37              |       | 40, 74, 114             |                         |                                      |                         |  |
| 7, 12, 20               |       | 4, 6, 11                |                         |                                      |                         |  |
| Starter                 | Adder | Starter+ Adder          | Starter                 | Adder                                | Starter + Adder         |  |
| 39, 77, 104             | 3     | 42, 80, 107             | 34, 76, 102             | 1                                    | 35, 77, 103             |  |
| 33, 119, 137            | 4     | 37, 123, 141            | 61, 85, 136             | 6                                    | 67, 91, 142             |  |
| 43, 111, 144            | 7     | 50, 118, 151            | 42, 134, 166            | 5                                    | 47, 139, 171            |  |
| 65, 100, 146            | 8     | 73, 108, 154            | 51, 117, 156            | 2                                    | 53, 119, 158            |  |
| 50, 103, 154            | 10    | 60, 113, 164            | 48, 90, 120             | 11                                   | 59, 101, 131            |  |
| 44, 118, 172            | 19    | 63, 137, 17             | 64, 105, 148            | 12                                   | 76, 117, 160            |  |
| 63, 129, 168            | 9     | 72, 138, 3              | 62, 126, 171            | 21                                   | 83, 147, 18             |  |
| 56, 101, 149            | 26    | 82, 127, 1              | 53, 113, 173            | 13                                   | 66, 126, 12             |  |
| 1, 2, 3                 | 20    | 21, 22, 23              | 4, 8, 16                | 117                                  | 121, 125, 133           |  |
| 5, 9, 21                | 152   | 157, 161, 173           | 6, 15, 26               | 114                                  | 120, 129, 140           |  |
| 10, 13, 19              | 75    | 85, 88, 94              | 11, 17, 169             | 89                                   | 100, 106, 84            |  |
| 22, 25, 40              | 24    | 46, 49, 64              | 27, 38, 59              | 97                                   | 124, 135, 156           |  |
| 30, 106, 127            | 22    | 52, 128, 149            | 31, 110, 125            | 119                                  | 150, 55, 70             |  |
| 94, 121, $\infty_0$     | 85    | 5, 32, $\infty_0$       | 86, 157, $\infty_1$     | 127                                  | 39, 110, $\infty_1$     |  |
| 97, 170, $\infty_2$     | 65    | 162, 61, $\infty_2$     | 114, 150, $\infty_3$    | 18                                   | 132, 168, $\infty_3$    |  |
| 93, 165, $\infty_4$     | 101   | 20, 92, $\infty_4$      | 71, 130, $\infty_5$     | 72                                   | 143, 28, $\infty_5$     |  |
| 84, 162, $\infty_6$     | 46    | 130, 34, $\infty_6$     | 88, 163, $\infty_7$     | 110                                  | 24, 99, $\infty_7$      |  |
| 98, 131, $\infty_8$     | 121   | 45, 78, $\infty_8$      | 95, 158, $\infty_9$     | 14                                   | 109, 172, $\infty_9$    |  |
| 80, 159, $\infty_{10}$  | 90    | 170, 75, $\infty_{10}$  | 75, 138, $\infty_{11}$  | 77                                   | 152, 41, $\infty_{11}$  |  |
| 78, 142, $\infty_{12}$  | 27    | 105, 169, $\infty_{12}$ | 79, 161, $\infty_{13}$  | 23                                   | 102, 10, $\infty_{13}$  |  |
| 82, 143, $\infty_{14}$  | 146   | 54, 115, $\infty_{14}$  | 132, 155, $\infty_{15}$ | 33                                   | 165, 14, $\infty_{15}$  |  |
| 96, 153, $\infty_{16}$  | 143   | 65, 122, $\infty_{16}$  | 109, 133, $\infty_{17}$ | 50                                   | 159, 9, $\infty_{17}$   |  |
| 69, 128, $\infty_{18}$  | 141   | 36, 95, $\infty_{18}$   | 99, 147, $\infty_{19}$  | 108                                  | 33, 81, $\infty_{19}$   |  |
| 92, 122, $\infty_{20}$  | 44    | 136, 166, $\infty_{20}$ | 83, 140, $\infty_{21}$  | 61                                   | 144, 27, $\infty_{21}$  |  |
| 74, 115, $\infty_{22}$  | 38    | 112, 153, $\infty_{22}$ | 72, 160, $\infty_{23}$  | 83                                   | 155, 69, $\infty_{23}$  |  |
| 67, 152, $\infty_{24}$  | 120   | 13, 98, $\infty_{24}$   | 66, 151, $\infty_{25}$  | 30                                   | 96, 7, $\infty_{25}$    |  |
| 57, 135, $\infty_{26}$  | 32    | 89, 167, $\infty_{26}$  | 49, 139, $\infty_{27}$  | 37                                   | 86, 2, $\infty_{27}$    |  |
| 46, 123, $\infty_{28}$  | 25    | 71, 148, $\infty_{28}$  | 32, 68, $\infty_{29}$   | 36                                   | 68, 104, $\infty_{29}$  |  |

**Table C**  $(S, C, R)$  and  $A$  for  $(1, 2; 3)$ -frames of type  $9^u(3\ell)^1$

| C                                                                                                                                                                                                                                                                                        |                                                                                                       | R                                                                                                                                                                                                                                                                                           |                                                                                                                                                                                                                                                                                                       | A (1, 2, 3)-frame of type $9^5 9^1$                                                                     |                                                                                                                                                                                                                                                                                                     |  |
|------------------------------------------------------------------------------------------------------------------------------------------------------------------------------------------------------------------------------------------------------------------------------------------|-------------------------------------------------------------------------------------------------------|---------------------------------------------------------------------------------------------------------------------------------------------------------------------------------------------------------------------------------------------------------------------------------------------|-------------------------------------------------------------------------------------------------------------------------------------------------------------------------------------------------------------------------------------------------------------------------------------------------------|---------------------------------------------------------------------------------------------------------|-----------------------------------------------------------------------------------------------------------------------------------------------------------------------------------------------------------------------------------------------------------------------------------------------------|--|
| 4, 6, 17<br>8, 12, 31<br>13, 21, 29                                                                                                                                                                                                                                                      |                                                                                                       | 7, 11, 18<br>9, 16, 32<br>14, 28, 42                                                                                                                                                                                                                                                        |                                                                                                                                                                                                                                                                                                       |                                                                                                         |                                                                                                                                                                                                                                                                                                     |  |
| Starter                                                                                                                                                                                                                                                                                  | Adder                                                                                                 | Starter+ Adder                                                                                                                                                                                                                                                                              | Starter                                                                                                                                                                                                                                                                                               | Adder                                                                                                   | Starter + Adder                                                                                                                                                                                                                                                                                     |  |
| 1, 2, 3<br>9, 18, 36<br>14, 26, $\infty_1$<br>23, 42, $\infty_3$<br>27, 44, $\infty_5$<br>33, 39, $\infty_7$                                                                                                                                                                             | 36<br>13<br>7<br>6<br>37<br>14                                                                        | 37, 38, 39<br>22, 31, 4<br>21, 33, $\infty_1$<br>29, 3, $\infty_3$<br>19, 36, $\infty_5$<br>2, 8, $\infty_7$                                                                                                                                                                                | 7, 16, 19<br>11, 32, $\infty_0$<br>22, 43, $\infty_2$<br>24, 37, $\infty_4$<br>28, 34, $\infty_6$<br>38, 41, $\infty_8$                                                                                                                                                                               | 27<br>12<br>19<br>34<br>23<br>31                                                                        | 34, 43, 1<br>23, 44, $\infty_0$<br>41, 17, $\infty_2$<br>13, 26, $\infty_4$<br>6, 12, $\infty_6$<br>24, 27, $\infty_8$                                                                                                                                                                              |  |
| C                                                                                                                                                                                                                                                                                        |                                                                                                       | R                                                                                                                                                                                                                                                                                           |                                                                                                                                                                                                                                                                                                       | A (1, 2, 3)-frame of type $9^7 9^1$                                                                     |                                                                                                                                                                                                                                                                                                     |  |
| 22, 38, 54<br>19, 39, 62<br>18, 37, 59                                                                                                                                                                                                                                                   |                                                                                                       | 12, 29, 46<br>11, 24, 34<br>8, 16, 27                                                                                                                                                                                                                                                       |                                                                                                                                                                                                                                                                                                       |                                                                                                         |                                                                                                                                                                                                                                                                                                     |  |
| Starter                                                                                                                                                                                                                                                                                  | Adder                                                                                                 | Starter+ Adder                                                                                                                                                                                                                                                                              | Starter                                                                                                                                                                                                                                                                                               | Adder                                                                                                   | Starter + Adder                                                                                                                                                                                                                                                                                     |  |
| 1, 2, 3<br>5, 8, 13<br>11, 15, 40<br>17, 41, 50<br>25, 43, 55<br>27, 52, $\infty_1$<br>30, 45, $\infty_3$<br>32, 58, $\infty_5$<br>34, 46, $\infty_7$                                                                                                                                    | 1<br>18<br>40<br>52<br>60<br>10<br>3<br>50<br>27                                                      | 2, 3, 4<br>23, 26, 31<br>51, 55, 17<br>6, 30, 39<br>22, 40, 52<br>37, 62, $\infty_1$<br>33, 48, $\infty_3$<br>19, 45, $\infty_5$<br>61, 10, $\infty_7$                                                                                                                                      | 4, 6, 9<br>10, 16, 20<br>12, 23, 36<br>24, 51, 60<br>26, 44, $\infty_0$<br>29, 61, $\infty_2$<br>31, 57, $\infty_4$<br>33, 48, $\infty_6$<br>47, 53, $\infty_8$                                                                                                                                       | 9<br>34<br>24<br>8<br>62<br>43<br>26<br>5<br>11                                                         | 13, 15, 18<br>44, 50, 54<br>36, 47, 60<br>32, 59, 5<br>25, 43, $\infty_0$<br>9, 41, $\infty_2$<br>57, 20, $\infty_4$<br>38, 53, $\infty_6$<br>58, 1, $\infty_8$                                                                                                                                     |  |
| C                                                                                                                                                                                                                                                                                        |                                                                                                       | R                                                                                                                                                                                                                                                                                           |                                                                                                                                                                                                                                                                                                       | A (1, 2, 3)-frame of type $9^{11} 9^1$                                                                  |                                                                                                                                                                                                                                                                                                     |  |
| 31, 59, 93<br>29, 57, 91<br>25, 51, 83                                                                                                                                                                                                                                                   |                                                                                                       | 20, 39, 58<br>10, 23, 30<br>27, 56, 85                                                                                                                                                                                                                                                      |                                                                                                                                                                                                                                                                                                       |                                                                                                         |                                                                                                                                                                                                                                                                                                     |  |
| Starter                                                                                                                                                                                                                                                                                  | Adder                                                                                                 | Starter+ Adder                                                                                                                                                                                                                                                                              | Starter                                                                                                                                                                                                                                                                                               | Adder                                                                                                   | Starter + Adder                                                                                                                                                                                                                                                                                     |  |
| 41, 58, 97<br>30, 53, 65<br>21, 37, 52<br>43, 67, 92<br>38, 78, 95<br>1, 2, 3<br>5, 8, 12<br>10, 15, 23<br>16, 26, 62<br>19, 49, 70<br>36, 75, 89<br>46, 61, $\infty_1$<br>50, 90, $\infty_3$<br>63, 98, $\infty_5$<br>69, 87, $\infty_7$                                                | 1<br>7<br>10<br>8<br>16<br>12<br>59<br>72<br>53<br>86<br>48<br>57<br>26<br>27<br>37                   | 42, 59, 98<br>37, 60, 72<br>31, 47, 62<br>51, 75, 1<br>54, 94, 12<br>13, 14, 15<br>64, 67, 71<br>82, 87, 95<br>69, 79, 16<br>6, 36, 57<br>84, 24, 38<br>4, 19, $\infty_1$<br>76, 17, $\infty_3$<br>90, 26, $\infty_5$<br>7, 25, $\infty_7$                                                  | 32, 48, 79<br>24, 42, 85<br>45, 71, 94<br>39, 64, 96<br>35, 56, 86<br>4, 6, 9<br>7, 13, 17<br>14, 20, 28<br>18, 27, 72<br>34, 54, 81<br>40, 76, $\infty_0$<br>47, 74, $\infty_2$<br>60, 84, $\infty_4$<br>68, 80, $\infty_6$<br>73, 82, $\infty_8$                                                    | 2<br>4<br>3<br>6<br>5<br>74<br>79<br>21<br>90<br>39<br>28<br>54<br>47<br>84<br>69                       | 34, 50, 81<br>28, 46, 89<br>48, 74, 97<br>45, 70, 3<br>40, 61, 91<br>78, 80, 83<br>86, 92, 96<br>35, 41, 49<br>9, 18, 63<br>73, 93, 21<br>68, 5, $\infty_0$<br>2, 29, $\infty_2$<br>8, 32, $\infty_4$<br>53, 65, $\infty_6$<br>43, 52, $\infty_8$                                                   |  |
| C                                                                                                                                                                                                                                                                                        |                                                                                                       | R                                                                                                                                                                                                                                                                                           |                                                                                                                                                                                                                                                                                                       | A (1, 2, 3)-frame of type $9^{13} 9^1$                                                                  |                                                                                                                                                                                                                                                                                                     |  |
| 35, 66, 106<br>33, 67, 101<br>24, 47, 64                                                                                                                                                                                                                                                 |                                                                                                       | 30, 53, 85<br>34, 69, 107<br>14, 28, 36                                                                                                                                                                                                                                                     |                                                                                                                                                                                                                                                                                                       |                                                                                                         |                                                                                                                                                                                                                                                                                                     |  |
| Starter                                                                                                                                                                                                                                                                                  | Adder                                                                                                 | Starter+ Adder                                                                                                                                                                                                                                                                              | Starter                                                                                                                                                                                                                                                                                               | Adder                                                                                                   | Starter + Adder                                                                                                                                                                                                                                                                                     |  |
| 29, 51, 71<br>21, 31, 40<br>18, 28, 63<br>36, 57, 103<br>27, 70, 99<br>55, 76, 113<br>43, 68, 96<br>37, 74, 98<br>49, 80, 116<br>46, 79, 109<br>1, 2, 3<br>5, 11, 60<br>8, 15, 20<br>12, 16, 59<br>34, 50, $\infty_1$<br>77, 92, $\infty_3$<br>83, 94, $\infty_5$<br>93, 102, $\infty_7$ | 3<br>4<br>9<br>5<br>16<br>8<br>14<br>109<br>84<br>18<br>86<br>62<br>108<br>43<br>69<br>47<br>17<br>95 | 32, 54, 74<br>25, 35, 44<br>27, 37, 72<br>41, 62, 108<br>43, 86, 115<br>63, 84, 4<br>57, 82, 110<br>29, 66, 90<br>16, 47, 83<br>64, 97, 10<br>87, 88, 89<br>67, 73, 5<br>116, 6, 11<br>55, 59, 102<br>103, 2, $\infty_1$<br>7, 22, $\infty_3$<br>100, 111, $\infty_5$<br>71, 80, $\infty_7$ | 22, 69, 97<br>19, 30, 44<br>38, 56, 107<br>32, 73, 90<br>23, 41, 89<br>54, 87, 111<br>42, 62, 115<br>53, 82, 114<br>48, 75, 105<br>45, 72, 108<br>4, 6, 10<br>7, 14, 112<br>9, 85, 88<br>17, 25, $\infty_0$<br>58, 61, $\infty_2$<br>81, 86, $\infty_4$<br>84, 100, $\infty_6$<br>95, 110, $\infty_8$ | 1<br>12<br>2<br>6<br>10<br>7<br>50<br>23<br>20<br>90<br>11<br>106<br>41<br>89<br>105<br>55<br>110<br>82 | 23, 70, 98<br>31, 42, 56<br>40, 58, 109<br>38, 79, 96<br>33, 51, 99<br>61, 94, 1<br>92, 112, 48<br>76, 105, 20<br>68, 95, 8<br>18, 45, 81<br>15, 17, 21<br>113, 3, 101<br>50, 9, 12<br>106, 114, $\infty_0$<br>46, 49, $\infty_2$<br>19, 24, $\infty_4$<br>77, 93, $\infty_6$<br>60, 75, $\infty_8$ |  |



Table C (Cont.) (S, C, R) and A for (1, 2, 3)-frames of type  $9^u(3\ell)^1$ 

| C                                                                                                                                                                                                                                                                                                                                                                                                                                                       |                                                                                                                                                                          | R                                                                                                                                                                                                                                                                                                                                                                                                                                                    | A (1, 2, 3)-frame of type $9^{14}9^1$                                                                                                                                                                                                                                                                                                                                                                                                                |                                                                                                                                                                          |                                                                                                                                                                                                                                                                                                                                                                                                                                                             |
|---------------------------------------------------------------------------------------------------------------------------------------------------------------------------------------------------------------------------------------------------------------------------------------------------------------------------------------------------------------------------------------------------------------------------------------------------------|--------------------------------------------------------------------------------------------------------------------------------------------------------------------------|------------------------------------------------------------------------------------------------------------------------------------------------------------------------------------------------------------------------------------------------------------------------------------------------------------------------------------------------------------------------------------------------------------------------------------------------------|------------------------------------------------------------------------------------------------------------------------------------------------------------------------------------------------------------------------------------------------------------------------------------------------------------------------------------------------------------------------------------------------------------------------------------------------------|--------------------------------------------------------------------------------------------------------------------------------------------------------------------------|-------------------------------------------------------------------------------------------------------------------------------------------------------------------------------------------------------------------------------------------------------------------------------------------------------------------------------------------------------------------------------------------------------------------------------------------------------------|
| 40, 80, 120<br>30, 61, 92<br>23, 43, 66                                                                                                                                                                                                                                                                                                                                                                                                                 |                                                                                                                                                                          | 34, 68, 105<br>31, 63, 104<br>36, 71, 109                                                                                                                                                                                                                                                                                                                                                                                                            |                                                                                                                                                                                                                                                                                                                                                                                                                                                      |                                                                                                                                                                          |                                                                                                                                                                                                                                                                                                                                                                                                                                                             |
| Starter                                                                                                                                                                                                                                                                                                                                                                                                                                                 | Adder                                                                                                                                                                    | Starter+ Adder                                                                                                                                                                                                                                                                                                                                                                                                                                       | Starter                                                                                                                                                                                                                                                                                                                                                                                                                                              | Adder                                                                                                                                                                    | Starter + Adder                                                                                                                                                                                                                                                                                                                                                                                                                                             |
| 19, 26, 35<br>15, 32, 100<br>10, 16, 91<br>33, 111, 122<br>24, 54, 78<br>63, 82, 108<br>39, 57, 107<br>34, 52, 73<br>48, 97, 119<br>45, 67, 114<br>59, 86, 118<br>51, 87, 125<br>49, 76, 110<br>2, 5, 6<br>7, 11, 113<br>31, 109, $\infty_0$<br>46, 93, $\infty_2$<br>65, 72, $\infty_4$<br>95, 101, $\infty_6$<br>106, 115, $\infty_8$                                                                                                                 | 3<br>8<br>5<br>10<br>13<br>15<br>7<br>27<br>88<br>20<br>125<br>82<br>114<br>38<br>24<br>110<br>41<br>34<br>106                                                           | 22, 29, 38<br>23, 40, 108<br>15, 21, 96<br>43, 121, 6<br>37, 67, 91<br>78, 97, 123<br>46, 64, 114<br>61, 79, 100<br>10, 59, 81<br>65, 87, 8<br>58, 85, 117<br>103, 13, 51<br>5, 32, 66<br>116, 119, 120<br>45, 49, 25<br>55, 7, $\infty_0$<br>30, 77, $\infty_2$<br>106, 113, $\infty_4$<br>3, 9, $\infty_6$<br>86, 95, $\infty_8$                                                                                                                   | 17, 25, 71<br>13, 18, 29<br>38, 64, 81<br>27, 77, 90<br>22, 37, 88<br>55, 74, 99<br>36, 75, 105<br>60, 89, 124<br>47, 96, 121<br>41, 62, 85<br>58, 94, 123<br>50, 83, 116<br>1, 3, 117<br>4, 9, 12<br>8, 20, 21<br>44, 103, $\infty_1$<br>53, 68, $\infty_3$<br>69, 79, $\infty_5$<br>102, 104, $\infty_7$                                                                                                                                           | 1<br>6<br>9<br>12<br>11<br>2<br>17<br>22<br>123<br>53<br>30<br>117<br>59<br>71<br>122<br>25<br>57<br>58<br>76                                                            | 18, 26, 72<br>19, 24, 35<br>47, 73, 90<br>39, 89, 102<br>33, 48, 99<br>57, 76, 101<br>53, 92, 122<br>82, 111, 20<br>44, 93, 118<br>94, 115, 12<br>88, 124, 27<br>41, 74, 107<br>60, 62, 50<br>75, 80, 83<br>4, 16, 17<br>69, 2, $\infty_1$<br>110, 125, $\infty_3$<br>1, 11, $\infty_5$<br>52, 54, $\infty_7$                                                                                                                                               |
| C                                                                                                                                                                                                                                                                                                                                                                                                                                                       |                                                                                                                                                                          | R                                                                                                                                                                                                                                                                                                                                                                                                                                                    | A (1, 2, 3)-frame of type $9^{17}9^1$                                                                                                                                                                                                                                                                                                                                                                                                                |                                                                                                                                                                          |                                                                                                                                                                                                                                                                                                                                                                                                                                                             |
| 54, 103, 152<br>41, 87, 139<br>38, 78, 118                                                                                                                                                                                                                                                                                                                                                                                                              |                                                                                                                                                                          | 22, 44, 69<br>39, 82, 128<br>31, 63, 98                                                                                                                                                                                                                                                                                                                                                                                                              |                                                                                                                                                                                                                                                                                                                                                                                                                                                      |                                                                                                                                                                          |                                                                                                                                                                                                                                                                                                                                                                                                                                                             |
| Starter                                                                                                                                                                                                                                                                                                                                                                                                                                                 | Adder                                                                                                                                                                    | Starter+ Adder                                                                                                                                                                                                                                                                                                                                                                                                                                       | Starter                                                                                                                                                                                                                                                                                                                                                                                                                                              | Adder                                                                                                                                                                    | Starter + Adder                                                                                                                                                                                                                                                                                                                                                                                                                                             |
| 18, 60, 81<br>42, 71, 141<br>35, 73, 129<br>47, 82, 109<br>7, 16, 26<br>9, 12, 19<br>32, 48, 122<br>20, 29, 117<br>14, 144, 148<br>63, 83, 127<br>57, 70, 96<br>65, 79, 112<br>53, 76, 84<br>62, 106, 138<br>22, 40, 134<br>49, 75, 149<br>64, 95, 133<br>25, 58, 94<br>44, 130, 145<br>61, 121, 143<br>69, 77, $\infty_1$<br>92, 140, $\infty_3$<br>98, 128, $\infty_5$<br>111, 126, $\infty_7$                                                        | 133<br>50<br>115<br>48<br>83<br>96<br>49<br>81<br>59<br>37<br>124<br>5<br>3<br>42<br>15<br>93<br>63<br>35<br>94<br>145<br>109<br>14<br>13<br>11                          | 151, 40, 61<br>92, 121, 38<br>150, 35, 91<br>95, 130, 4<br>90, 99, 109<br>105, 108, 115<br>81, 97, 18<br>101, 110, 45<br>73, 50, 54<br>100, 120, 11<br>28, 41, 67<br>70, 84, 117<br>56, 79, 87<br>104, 148, 27<br>37, 55, 149<br>142, 15, 89<br>127, 5, 43<br>60, 93, 129<br>138, 71, 86<br>53, 113, 135<br>25, 33, $\infty_1$<br>106, 1, $\infty_3$<br>111, 141, $\infty_5$<br>122, 137, $\infty_7$                                                 | 30, 80, 100<br>27, 43, 88<br>21, 33, 45<br>5, 8, 116<br>23, 37, 50<br>39, 101, 142<br>66, 132, 137<br>4, 6, 11<br>59, 135, 146<br>28, 93, 123<br>1, 2, 3<br>13, 24, 105<br>36, 108, 114<br>46, 74, 99<br>15, 72, 90<br>56, 104, 110<br>31, 52, 89<br>55, 91, 151<br>10, 120, 124<br>67, 147, $\infty_0$<br>86, 115, $\infty_2$<br>97, 125, $\infty_4$<br>107, 131, $\infty_6$<br>113, 150, $\infty_8$                                                | 149<br>19<br>110<br>24<br>139<br>127<br>28<br>128<br>21<br>118<br>123<br>120<br>87<br>131<br>146<br>8<br>121<br>23<br>39<br>80<br>97<br>75<br>38<br>106                  | 26, 76, 96<br>46, 62, 107<br>131, 143, 2<br>29, 32, 140<br>9, 23, 36<br>13, 75, 116<br>94, 7, 12<br>132, 134, 139<br>80, 3, 14<br>146, 58, 88<br>124, 125, 126<br>133, 144, 72<br>123, 42, 48<br>24, 52, 77<br>8, 65, 83<br>64, 112, 118<br>152, 20, 57<br>78, 114, 21<br>49, 6, 10<br>147, 74, $\infty_0$<br>30, 59, $\infty_2$<br>19, 47, $\infty_4$<br>145, 16, $\infty_6$<br>66, 103, $\infty_8$                                                        |
| C                                                                                                                                                                                                                                                                                                                                                                                                                                                       |                                                                                                                                                                          | R                                                                                                                                                                                                                                                                                                                                                                                                                                                    | A (1, 2, 3)-frame of type $9^{19}9^1$                                                                                                                                                                                                                                                                                                                                                                                                                |                                                                                                                                                                          |                                                                                                                                                                                                                                                                                                                                                                                                                                                             |
| 56, 106, 165<br>47, 96, 145<br>41, 81, 124                                                                                                                                                                                                                                                                                                                                                                                                              |                                                                                                                                                                          | 31, 63, 98<br>27, 53, 82<br>17, 33, 49                                                                                                                                                                                                                                                                                                                                                                                                               |                                                                                                                                                                                                                                                                                                                                                                                                                                                      |                                                                                                                                                                          |                                                                                                                                                                                                                                                                                                                                                                                                                                                             |
| Starter                                                                                                                                                                                                                                                                                                                                                                                                                                                 | Adder                                                                                                                                                                    | Starter+ Adder                                                                                                                                                                                                                                                                                                                                                                                                                                       | Starter                                                                                                                                                                                                                                                                                                                                                                                                                                              | Adder                                                                                                                                                                    | Starter + Adder                                                                                                                                                                                                                                                                                                                                                                                                                                             |
| 16, 93, 115<br>42, 50, 167<br>17, 146, 161<br>13, 103, 123<br>29, 80, 125<br>33, 46, 120<br>28, 30, 154<br>21, 155, 164<br>35, 60, 139<br>40, 128, 170<br>8, 126, 136<br>49, 85, 149<br>55, 67, 107<br>63, 118, 141<br>22, 61, 169<br>44, 100, 131<br>2, 68, 82<br>34, 62, 86<br>37, 78, 148<br>73, 74, 77<br>11, 75, 108<br>23, 31, 134<br>83, 110, 160<br>89, 119, $\infty_1$<br>105, 117, $\infty_3$<br>132, 166, $\infty_5$<br>138, 159, $\infty_7$ | 50<br>27<br>128<br>8<br>54<br>96<br>157<br>22<br>124<br>79<br>67<br>12<br>134<br>104<br>83<br>156<br>45<br>18<br>69<br>122<br>75<br>105<br>160<br>43<br>150<br>162<br>32 | 66, 143, 165<br>69, 77, 23<br>145, 103, 118<br>21, 111, 131<br>83, 134, 8<br>129, 142, 45<br>14, 16, 140<br>43, 6, 15<br>159, 13, 92<br>119, 36, 78<br>75, 22, 32<br>61, 97, 161<br>18, 30, 70<br>167, 51, 74<br>105, 144, 81<br>29, 85, 116<br>47, 113, 127<br>52, 80, 104<br>106, 147, 46<br>24, 25, 28<br>86, 150, 12<br>128, 136, 68<br>72, 99, 149<br>132, 162, $\infty_1$<br>84, 96, $\infty_3$<br>123, 157, $\infty_5$<br>170, 20, $\infty_7$ | 36, 129, 142<br>10, 27, 147<br>64, 71, 143<br>20, 59, 122<br>43, 91, 156<br>15, 153, 157<br>12, 101, 121<br>53, 70, 88<br>25, 94, 150<br>1, 4, 90<br>45, 51, 52<br>3, 130, 144<br>39, 87, 112<br>48, 58, 69<br>5, 7, 66<br>9, 14, 127<br>24, 92, 158<br>65, 109, 140<br>32, 79, 102<br>6, 97, 168<br>26, 111, 116<br>18, 54, 72<br>84, 99, $\infty_0$<br>98, 104, $\infty_2$<br>113, 135, $\infty_4$<br>137, 163, $\infty_6$<br>151, 162, $\infty_8$ | 24<br>111<br>92<br>53<br>170<br>85<br>25<br>127<br>112<br>121<br>3<br>106<br>23<br>100<br>51<br>164<br>10<br>42<br>62<br>4<br>148<br>158<br>40<br>56<br>166<br>123<br>59 | 60, 153, 166<br>121, 138, 87<br>156, 163, 64<br>73, 112, 4<br>42, 90, 155<br>100, 67, 71<br>37, 126, 146<br>9, 26, 44<br>137, 35, 91<br>122, 125, 40<br>48, 54, 55<br>109, 65, 79<br>62, 110, 135<br>148, 158, 169<br>56, 58, 117<br>2, 7, 120<br>34, 102, 168<br>107, 151, 11<br>94, 141, 164<br>10, 101, 1<br>3, 88, 93<br>5, 41, 59<br>124, 139, $\infty_0$<br>154, 160, $\infty_2$<br>108, 130, $\infty_4$<br>89, 115, $\infty_6$<br>39, 50, $\infty_8$ |

Table C (Cont.) (S, C, R) and A for (1, 2, 3)-frames of type  $9^u(3\ell)^1$ 

| C                       |       | R                       | A (1, 2, 3)-frame of type $9^{19}45^1$ |       |                         |
|-------------------------|-------|-------------------------|----------------------------------------|-------|-------------------------|
| 2, 67, 69               |       | 43, 87, 134             |                                        |       |                         |
| 1, 86, 87               |       | 48, 100, 158            |                                        |       |                         |
| 56, 106, 165            |       | 39, 80, 121             |                                        |       |                         |
| 50, 103, 153            |       | 46, 92, 138             |                                        |       |                         |
| 47, 96, 145             |       | 41, 81, 124             |                                        |       |                         |
| 40, 77, 117             |       | 34, 68, 102             |                                        |       |                         |
| 36, 71, 115             |       | 29, 60, 91              |                                        |       |                         |
| 31, 63, 98              |       | 27, 53, 82              |                                        |       |                         |
| 28, 54, 83              |       | 23, 45, 70              |                                        |       |                         |
| 26, 51, 79              |       | 22, 42, 65              |                                        |       |                         |
| 18, 35, 55              |       | 17, 33, 49              |                                        |       |                         |
| 16, 30, 44              |       | 5, 9, 13                |                                        |       |                         |
| 8, 15, 25               |       | 7, 12, 20               |                                        |       |                         |
| 4, 6, 11                |       | 10, 21, 32              |                                        |       |                         |
| 14, 24, 37              |       | 52, 104, 162            |                                        |       |                         |
| Starter                 | Adder | Starter+ Adder          | Starter                                | Adder | Starter + Adder         |
| 7, 13, 46               | 62    | 69, 75, 108             | 5, 17, 20                              | 148   | 153, 165, 168           |
| 3, 72, 156              | 125   | 128, 26, 110            | 23, 41, 111                            | 78    | 101, 119, 18            |
| 21, 33, 60              | 3     | 24, 36, 63              | 10, 52, 82                             | 34    | 44, 86, 116             |
| 32, 116, 143            | 56    | 88, 1, 28               | 29, 53, 107                            | 89    | 118, 142, 25            |
| 27, 118, 139            | 67    | 94, 14, 35              | 101, 161, $\infty_0$                   | 47    | 148, 37, $\infty_0$     |
| 93, 164, $\infty_1$     | 81    | 3, 74, $\infty_1$       | 78, 148, $\infty_2$                    | 164   | 71, 141, $\infty_2$     |
| 66, 120, $\infty_3$     | 11    | 77, 131, $\infty_3$     | 85, 154, $\infty_4$                    | 153   | 67, 136, $\infty_4$     |
| 49, 113, $\infty_5$     | 7     | 56, 120, $\infty_5$     | 62, 137, $\infty_6$                    | 163   | 54, 129, $\infty_6$     |
| 43, 73, $\infty_7$      | 82    | 125, 155, $\infty_7$    | 80, 131, $\infty_8$                    | 25    | 105, 156, $\infty_8$    |
| 70, 126, $\infty_9$     | 9     | 79, 135, $\infty_9$     | 61, 109, $\infty_{10}$                 | 52    | 113, 161, $\infty_{10}$ |
| 48, 84, $\infty_{11}$   | 42    | 90, 126, $\infty_{11}$  | 42, 75, $\infty_{12}$                  | 98    | 140, 2, $\infty_{12}$   |
| 65, 146, $\infty_{13}$  | 1     | 66, 147, $\infty_{13}$  | 89, 140, $\infty_{14}$                 | 14    | 103, 154, $\infty_{14}$ |
| 136, 160, $\infty_{15}$ | 66    | 31, 55, $\infty_{15}$   | 74, 130, $\infty_{16}$                 | 105   | 8, 64, $\infty_{16}$    |
| 81, 144, $\infty_{17}$  | 86    | 167, 59, $\infty_{17}$  | 64, 112, $\infty_{18}$                 | 51    | 115, 163, $\infty_{18}$ |
| 92, 155, $\infty_{19}$  | 162   | 83, 146, $\infty_{19}$  | 68, 149, $\infty_{20}$                 | 107   | 4, 85, $\infty_{20}$    |
| 45, 141, $\infty_{21}$  | 142   | 16, 112, $\infty_{21}$  | 88, 162, $\infty_{22}$                 | 141   | 58, 132, $\infty_{22}$  |
| 90, 167, $\infty_{23}$  | 170   | 89, 166, $\infty_{23}$  | 142, 151, $\infty_{24}$                | 159   | 130, 139, $\infty_{24}$ |
| 132, 147, $\infty_{25}$ | 135   | 96, 111, $\infty_{25}$  | 128, 134, $\infty_{26}$                | 23    | 151, 157, $\infty_{26}$ |
| 125, 170, $\infty_{27}$ | 108   | 62, 107, $\infty_{27}$  | 122, 123, $\infty_{28}$                | 146   | 97, 98, $\infty_{28}$   |
| 121, 124, $\infty_{29}$ | 156   | 106, 109, $\infty_{29}$ | 105, 150, $\infty_{30}$                | 138   | 72, 117, $\infty_{30}$  |
| 104, 169, $\infty_{31}$ | 166   | 99, 164, $\infty_{31}$  | 102, 168, $\infty_{32}$                | 147   | 78, 144, $\infty_{32}$  |
| 97, 163, $\infty_{33}$  | 158   | 84, 150, $\infty_{33}$  | 58, 100, $\infty_{34}$                 | 111   | 169, 40, $\infty_{34}$  |
| 94, 158, $\infty_{35}$  | 150   | 73, 137, $\infty_{35}$  | 59, 159, $\infty_{36}$                 | 63    | 122, 51, $\infty_{36}$  |
| 108, 129, $\infty_{37}$ | 41    | 149, 170, $\infty_{37}$ | 99, 135, $\infty_{38}$                 | 24    | 123, 159, $\infty_{38}$ |
| 157, 166, $\infty_{39}$ | 20    | 6, 15, $\infty_{39}$    | 39, 138, $\infty_{40}$                 | 22    | 61, 160, $\infty_{40}$  |
| 34, 127, $\infty_{41}$  | 16    | 50, 143, $\infty_{41}$  | 22, 119, $\infty_{42}$                 | 8     | 30, 127, $\infty_{42}$  |
| 12, 110, $\infty_{43}$  | 35    | 47, 145, $\infty_{43}$  | 9, 91, $\infty_{44}$                   | 2     | 11, 93, $\infty_{44}$   |

Table C (Cont.) (S, C, R) and A for (1, 2, 3)-frames of type  $9^u(3\ell)^1$ 

| C                       |       | R                       | A (1, 2, 3)-frame of type $9^{27}45^1$ |     |                         |
|-------------------------|-------|-------------------------|----------------------------------------|-----|-------------------------|
| 80, 156, 235            |       | 72, 142, 215            |                                        |     |                         |
| 76, 150, 230            |       | 67, 129, 194            |                                        |     |                         |
| 74, 145, 219            |       | 52, 102, 155            |                                        |     |                         |
| 62, 121, 180            |       | 48, 95, 139             |                                        |     |                         |
| 56, 112, 168            |       | 46, 92, 138             |                                        |     |                         |
| 64, 128, 192            |       | 43, 83, 126             |                                        |     |                         |
| 47, 91, 141             |       | 29, 58, 84              |                                        |     |                         |
| 23, 45, 70              |       | 39, 73, 107             |                                        |     |                         |
| 5, 9, 13                |       | 10, 21, 32              |                                        |     |                         |
| 36, 71, 109             |       | 63, 124, 185            |                                        |     |                         |
| 40, 77, 117             |       | 53, 105, 157            |                                        |     |                         |
| 22, 42, 65              |       | 19, 38, 57              |                                        |     |                         |
| 16, 30, 44              |       | 17, 33, 49              |                                        |     |                         |
| 34, 66, 101             |       | 75, 146, 223            |                                        |     |                         |
| 69, 136, 206            |       | 78, 154, 233            |                                        |     |                         |
| Starter                 | Adder | Starter+ Adder          |                                        |     |                         |
| 58, 155, 200            | 112   | 170, 24, 69             | 59, 146, 201                           | 102 | 161, 5, 60              |
| 60, 166, 214            | 44    | 104, 210, 15            | 63, 165, 223                           | 2   | 65, 167, 225            |
| 68, 177, 242            | 41    | 109, 218, 40            | 87, 169, 220                           | 109 | 196, 35, 86             |
| 89, 167, 233            | 155   | 1, 79, 145              | 90, 153, 222                           | 28  | 118, 181, 7             |
| 78, 160, 218            | 11    | 89, 171, 229            | 10, 31, 41                             | 91  | 101, 122, 132           |
| 8, 11, 17               | 234   | 242, 2, 8               | 6, 7, 12                               | 105 | 111, 112, 117           |
| 1, 2, 4                 | 210   | 211, 212, 214           | 26, 38, 51                             | 223 | 6, 18, 31               |
| 24, 33, 75              | 149   | 173, 182, 224           | 14, 29, 231                            | 56  | 70, 85, 44              |
| 73, 173, 241            | 95    | 168, 25, 93             | 92, 158, 207                           | 45  | 137, 203, 9             |
| 82, 154, 226            | 9     | 91, 163, 235            | 95, 152, 212                           | 127 | 222, 36, 96             |
| 19, 151, 171            | 26    | 45, 177, 197            | 18, 28, 35                             | 238 | 13, 23, 30              |
| 15, 20, 234             | 226   | 241, 3, 217             | 49, 102, 232                           | 82  | 131, 184, 71            |
| 39, 72, 186             | 22    | 61, 94, 208             | 46, 67, 103                            | 128 | 174, 195, 231           |
| 37, 164, 187            | 199   | 236, 120, 143           | 32, 50, 170                            | 115 | 147, 165, 42            |
| 57, 96, 215             | 17    | 74, 113, 232            | 55, 94, 130                            | 200 | 12, 51, 87              |
| 83, 132, 163            | 96    | 179, 228, 16            | 53, 115, 178                           | 61  | 114, 176, 239           |
| 52, 157, 199            | 185   | 237, 99, 141            | 113, 227, $\infty_0$                   | 156 | 26, 140, $\infty_0$     |
| 143, 176, $\infty_1$    | 177   | 77, 110, $\infty_1$     | 148, 172, $\infty_2$                   | 151 | 56, 80, $\infty_2$      |
| 137, 185, $\infty_3$    | 222   | 116, 164, $\infty_3$    | 133, 161, $\infty_4$                   | 25  | 158, 186, $\infty_4$    |
| 110, 196, $\infty_5$    | 183   | 50, 136, $\infty_5$     | 140, 142, $\infty_6$                   | 67  | 207, 209, $\infty_6$    |
| 134, 229, $\infty_7$    | 173   | 64, 159, $\infty_7$     | 138, 236, $\infty_8$                   | 66  | 204, 59, $\infty_8$     |
| 131, 228, $\infty_9$    | 70    | 201, 55, $\infty_9$     | 129, 221, $\infty_{10}$                | 59  | 188, 37, $\infty_{10}$  |
| 183, 191, $\infty_{11}$ | 7     | 190, 198, $\infty_{11}$ | 195, 240, $\infty_{12}$                | 169 | 121, 166, $\infty_{12}$ |
| 203, 210, $\infty_{13}$ | 10    | 213, 220, $\infty_{13}$ | 205, 217, $\infty_{14}$                | 213 | 175, 187, $\infty_{14}$ |
| 181, 194, $\infty_{15}$ | 240   | 178, 191, $\infty_{15}$ | 126, 239, $\infty_{16}$                | 104 | 230, 100, $\infty_{16}$ |
| 122, 224, $\infty_{17}$ | 168   | 47, 149, $\infty_{17}$  | 118, 208, $\infty_{18}$                | 187 | 62, 152, $\infty_{18}$  |
| 114, 204, $\infty_{19}$ | 1     | 115, 205, $\infty_{19}$ | 107, 193, $\infty_{20}$                | 147 | 11, 97, $\infty_{20}$   |
| 105, 190, $\infty_{21}$ | 75    | 180, 22, $\infty_{21}$  | 98, 182, $\infty_{22}$                 | 129 | 227, 68, $\infty_{22}$  |
| 100, 184, $\infty_{23}$ | 100   | 200, 41, $\infty_{23}$  | 97, 175, $\infty_{24}$                 | 63  | 160, 238, $\infty_{24}$ |
| 127, 237, $\infty_{25}$ | 198   | 82, 192, $\infty_{25}$  | 120, 213, $\infty_{26}$                | 157 | 34, 127, $\infty_{26}$  |
| 124, 211, $\infty_{27}$ | 225   | 106, 193, $\infty_{27}$ | 104, 198, $\infty_{28}$                | 65  | 169, 20, $\infty_{28}$  |
| 3, 139, $\infty_{29}$   | 237   | 240, 133, $\infty_{29}$ | 88, 209, $\infty_{30}$                 | 62  | 150, 28, $\infty_{30}$  |
| 85, 202, $\infty_{31}$  | 224   | 66, 183, $\infty_{31}$  | 43, 147, $\infty_{32}$                 | 110 | 153, 14, $\infty_{32}$  |
| 119, 149, $\infty_{33}$ | 53    | 172, 202, $\infty_{33}$ | 106, 225, $\infty_{34}$                | 141 | 4, 123, $\infty_{34}$   |
| 159, 174, $\infty_{35}$ | 47    | 206, 221, $\infty_{35}$ | 99, 116, $\infty_{36}$                 | 35  | 134, 151, $\infty_{36}$ |
| 93, 111, $\infty_{37}$  | 37    | 130, 148, $\infty_{37}$ | 86, 123, $\infty_{38}$                 | 33  | 119, 156, $\infty_{38}$ |
| 84, 125, $\infty_{39}$  | 19    | 103, 144, $\infty_{39}$ | 79, 188, $\infty_{40}$                 | 46  | 125, 234, $\infty_{40}$ |
| 61, 197, $\infty_{41}$  | 29    | 90, 226, $\infty_{41}$  | 48, 179, $\infty_{42}$                 | 40  | 88, 219, $\infty_{42}$  |
| 25, 238, $\infty_{43}$  | 103   | 128, 98, $\infty_{43}$  | 21, 144, $\infty_{44}$                 | 55  | 76, 199, $\infty_{44}$  |

**Table D**  $(S, C, R)$  and  $A$  for  $(1, 2, 3)$ -frames of type  $12^u(3\ell)^1$ 

| C                                                                                                                                                                                                                                                                                                                                                                                                                                                                                                                                                                                                                                                                                                                                                                 |                                                                                                                                                                                                                                                                | R                                                                                                                                                                                                                                                                                                                                                                                                                                                                                                                                                                                                                                                                                                                                                                  | A $(1, 2, 3)$ -frame of type $12^5 12^1$                                                                                                                                                                                                                                                                                                                                                                                                                                                                                                                                                                                                                                                                                                                        |                                                                                                                                                                                                                                                                  |                                                                                                                                                                                                                                                                                                                                                                                                                                                                                                                                                                                                                                                                                                                                                                    |
|-------------------------------------------------------------------------------------------------------------------------------------------------------------------------------------------------------------------------------------------------------------------------------------------------------------------------------------------------------------------------------------------------------------------------------------------------------------------------------------------------------------------------------------------------------------------------------------------------------------------------------------------------------------------------------------------------------------------------------------------------------------------|----------------------------------------------------------------------------------------------------------------------------------------------------------------------------------------------------------------------------------------------------------------|--------------------------------------------------------------------------------------------------------------------------------------------------------------------------------------------------------------------------------------------------------------------------------------------------------------------------------------------------------------------------------------------------------------------------------------------------------------------------------------------------------------------------------------------------------------------------------------------------------------------------------------------------------------------------------------------------------------------------------------------------------------------|-----------------------------------------------------------------------------------------------------------------------------------------------------------------------------------------------------------------------------------------------------------------------------------------------------------------------------------------------------------------------------------------------------------------------------------------------------------------------------------------------------------------------------------------------------------------------------------------------------------------------------------------------------------------------------------------------------------------------------------------------------------------|------------------------------------------------------------------------------------------------------------------------------------------------------------------------------------------------------------------------------------------------------------------|--------------------------------------------------------------------------------------------------------------------------------------------------------------------------------------------------------------------------------------------------------------------------------------------------------------------------------------------------------------------------------------------------------------------------------------------------------------------------------------------------------------------------------------------------------------------------------------------------------------------------------------------------------------------------------------------------------------------------------------------------------------------|
| 22, 39, 56<br>19, 33, 47<br>13, 21, 29<br>7, 11, 18                                                                                                                                                                                                                                                                                                                                                                                                                                                                                                                                                                                                                                                                                                               |                                                                                                                                                                                                                                                                | 4, 6, 17<br>14, 27, 46<br>8, 12, 31<br>9, 16, 32                                                                                                                                                                                                                                                                                                                                                                                                                                                                                                                                                                                                                                                                                                                   |                                                                                                                                                                                                                                                                                                                                                                                                                                                                                                                                                                                                                                                                                                                                                                 |                                                                                                                                                                                                                                                                  |                                                                                                                                                                                                                                                                                                                                                                                                                                                                                                                                                                                                                                                                                                                                                                    |
| Starter                                                                                                                                                                                                                                                                                                                                                                                                                                                                                                                                                                                                                                                                                                                                                           | Adder                                                                                                                                                                                                                                                          | Starter+ Adder                                                                                                                                                                                                                                                                                                                                                                                                                                                                                                                                                                                                                                                                                                                                                     | Starter                                                                                                                                                                                                                                                                                                                                                                                                                                                                                                                                                                                                                                                                                                                                                         | Adder                                                                                                                                                                                                                                                            | Starter + Adder                                                                                                                                                                                                                                                                                                                                                                                                                                                                                                                                                                                                                                                                                                                                                    |
| 1, 2, 3<br>6, 9, 12<br>14, 43, $\infty_0$<br>24, 51, $\infty_2$<br>27, 49, $\infty_4$<br>32, 58, $\infty_6$<br>36, 54, $\infty_8$<br>38, 59, $\infty_{10}$                                                                                                                                                                                                                                                                                                                                                                                                                                                                                                                                                                                                        | 21<br>47<br>28<br>27<br>59<br>56<br>8<br>14                                                                                                                                                                                                                    | 22, 23, 24<br>53, 56, 59<br>42, 11, $\infty_0$<br>51, 18, $\infty_2$<br>26, 48, $\infty_4$<br>28, 54, $\infty_6$<br>44, 2, $\infty_8$<br>52, 13, $\infty_{10}$                                                                                                                                                                                                                                                                                                                                                                                                                                                                                                                                                                                                     | 4, 16, 28<br>8, 17, 41<br>23, 44, $\infty_1$<br>26, 57, $\infty_3$<br>31, 53, $\infty_5$<br>34, 52, $\infty_7$<br>37, 46, $\infty_9$<br>42, 48, $\infty_{11}$                                                                                                                                                                                                                                                                                                                                                                                                                                                                                                                                                                                                   | 33<br>26<br>13<br>32<br>48<br>29<br>1<br>51                                                                                                                                                                                                                      | 37, 49, 1<br>34, 43, 7<br>36, 57, $\infty_1$<br>58, 29, $\infty_3$<br>19, 41, $\infty_5$<br>3, 21, $\infty_7$<br>38, 47, $\infty_9$<br>33, 39, $\infty_{11}$                                                                                                                                                                                                                                                                                                                                                                                                                                                                                                                                                                                                       |
| C                                                                                                                                                                                                                                                                                                                                                                                                                                                                                                                                                                                                                                                                                                                                                                 |                                                                                                                                                                                                                                                                | R                                                                                                                                                                                                                                                                                                                                                                                                                                                                                                                                                                                                                                                                                                                                                                  | A $(1, 2, 3)$ -frame of type $12^{22} 18^1$                                                                                                                                                                                                                                                                                                                                                                                                                                                                                                                                                                                                                                                                                                                     |                                                                                                                                                                                                                                                                  |                                                                                                                                                                                                                                                                                                                                                                                                                                                                                                                                                                                                                                                                                                                                                                    |
| 82, 168, 257<br>79, 158, 243<br>76, 156, 236<br>71, 141, 211<br>68, 136, 207<br>51, 101, 157                                                                                                                                                                                                                                                                                                                                                                                                                                                                                                                                                                                                                                                                      |                                                                                                                                                                                                                                                                | 81, 164, 250<br>74, 148, 225<br>47, 96, 145<br>57, 116, 178<br>26, 52, 78<br>36, 73, 113                                                                                                                                                                                                                                                                                                                                                                                                                                                                                                                                                                                                                                                                           |                                                                                                                                                                                                                                                                                                                                                                                                                                                                                                                                                                                                                                                                                                                                                                 |                                                                                                                                                                                                                                                                  |                                                                                                                                                                                                                                                                                                                                                                                                                                                                                                                                                                                                                                                                                                                                                                    |
| Starter                                                                                                                                                                                                                                                                                                                                                                                                                                                                                                                                                                                                                                                                                                                                                           | Adder                                                                                                                                                                                                                                                          | Starter+ Adder                                                                                                                                                                                                                                                                                                                                                                                                                                                                                                                                                                                                                                                                                                                                                     | Starter                                                                                                                                                                                                                                                                                                                                                                                                                                                                                                                                                                                                                                                                                                                                                         | Adder                                                                                                                                                                                                                                                            | Starter + Adder                                                                                                                                                                                                                                                                                                                                                                                                                                                                                                                                                                                                                                                                                                                                                    |
| 73, 116, 163<br>81, 178, 224<br>126, 171, 217<br>99, 160, 251<br>122, 177, 233<br>118, 183, 255<br>100, 161, 219<br>103, 179, 244<br>1, 2, 3<br>111, 180, 261<br>14, 24, 32<br>10, 17, 23<br>5, 8, 12<br>21, 36, 139<br>18, 29, 41<br>37, 57, 78<br>33, 196, 256<br>28, 52, 83<br>39, 64, 89<br>50, 143, 205<br>47, 75, 104<br>54, 216, 247<br>125, 159, 193<br>85, 115, 189<br>55, 90, 204<br>105, 199, 234<br>65, 144, 239<br>128, 167, 215<br>108, 153, 250<br>69, 150, 235<br>123, 201, 254<br>92, 170, 223<br>120, 184, 248<br>46, 147, $\infty_0$<br>60, 225, $\infty_2$<br>70, 231, $\infty_4$<br>109, 145, $\infty_6$<br>135, 152, $\infty_8$<br>146, 164, $\infty_{10}$<br>188, 202, $\infty_{12}$<br>194, 227, $\infty_{14}$<br>213, 241, $\infty_{16}$ | 67<br>232<br>222<br>45<br>250<br>145<br>53<br>96<br>121<br>144<br>63<br>151<br>165<br>175<br>241<br>160<br>195<br>237<br>1<br>4<br>11<br>7<br>10<br>13<br>75<br>47<br>129<br>143<br>93<br>65<br>119<br>211<br>33<br>115<br>104<br>116<br>54<br>64<br>258<br>30 | 140, 183, 230<br>49, 146, 192<br>84, 129, 175<br>144, 205, 32<br>108, 163, 219<br>263, 64, 136<br>153, 214, 8<br>199, 11, 76<br>122, 123, 124<br>255, 60, 141<br>77, 87, 95<br>161, 168, 174<br>170, 173, 177<br>196, 211, 50<br>259, 6, 18<br>197, 217, 238<br>228, 127, 187<br>1, 25, 56<br>40, 65, 90<br>54, 147, 209<br>58, 86, 115<br>61, 223, 254<br>135, 169, 203<br>98, 128, 202<br>130, 165, 15<br>152, 246, 17<br>194, 9, 104<br>120, 159, 207<br>134, 179, 12<br>212, 29, 114<br>216, 30, 83<br>157, 235, 24<br>239, 39, 103<br>257, 94, $\infty_0$<br>93, 258, $\infty_2$<br>185, 82, $\infty_4$<br>213, 249, $\infty_6$<br>251, 4, $\infty_8$<br>200, 218, $\infty_{10}$<br>252, 2, $\infty_{12}$<br>188, 221, $\infty_{14}$<br>243, 7, $\infty_{16}$ | 74, 117, 209<br>84, 131, 240<br>98, 185, 260<br>121, 203, 262<br>87, 138, 192<br>119, 186, 259<br>102, 162, 238<br>4, 6, 9<br>107, 174, 246<br>112, 181, 263<br>13, 19, 27<br>7, 11, 16<br>26, 42, 58<br>20, 31, 43<br>15, 25, 34<br>35, 48, 142<br>30, 45, 62<br>40, 77, 140<br>38, 67, 86<br>49, 165, 195<br>80, 113, 228<br>53, 91, 197<br>93, 129, 237<br>59, 166, 206<br>133, 172, 245<br>96, 134, 226<br>61, 187, 229<br>114, 210, 252<br>72, 130, 214<br>124, 175, 258<br>94, 169, 221<br>97, 151, 208<br>106, 190, 253<br>56, 155, $\infty_1$<br>63, 182, $\infty_3$<br>95, 200, $\infty_5$<br>127, 148, $\infty_7$<br>137, 230, $\infty_9$<br>149, 173, $\infty_{11}$<br>191, 218, $\infty_{13}$<br>212, 232, $\infty_{15}$<br>222, 249, $\infty_{17}$ | 38<br>55<br>185<br>37<br>34<br>48<br>135<br>42<br>117<br>72<br>78<br>52<br>243<br>49<br>92<br>90<br>247<br>2<br>3<br>6<br>5<br>9<br>8<br>16<br>57<br>140<br>226<br>46<br>245<br>156<br>39<br>59<br>25<br>228<br>80<br>136<br>100<br>14<br>31<br>235<br>29<br>208 | 112, 155, 247<br>139, 186, 31<br>19, 106, 181<br>158, 240, 35<br>121, 172, 226<br>167, 234, 43<br>237, 33, 109<br>46, 48, 51<br>224, 27, 99<br>184, 253, 71<br>91, 97, 105<br>59, 63, 68<br>5, 21, 37<br>69, 80, 92<br>107, 117, 126<br>125, 138, 232<br>13, 28, 45<br>42, 79, 142<br>41, 70, 89<br>55, 171, 201<br>85, 118, 233<br>62, 100, 206<br>101, 137, 245<br>75, 182, 222<br>190, 229, 38<br>236, 10, 102<br>23, 149, 191<br>160, 256, 34<br>53, 111, 195<br>16, 67, 150<br>133, 208, 260<br>156, 210, 3<br>131, 215, 14<br>20, 119, $\infty_1$<br>143, 262, $\infty_3$<br>231, 72, $\infty_5$<br>227, 248, $\infty_7$<br>151, 244, $\infty_9$<br>180, 204, $\infty_{11}$<br>162, 189, $\infty_{13}$<br>241, 261, $\infty_{15}$<br>166, 193, $\infty_{17}$ |

Table D (Cont.)  $(S, C, R)$  and  $A$  for  $(1, 2; 3)$ -frames of type  $12^n(3\ell)^1$ 

| C                       |       | R                       | A (1, 2, 3)-frame of type $12^{25}54^1$ |       |                         |
|-------------------------|-------|-------------------------|-----------------------------------------|-------|-------------------------|
| 7, 12, 20               |       | 10, 21, 32              |                                         |       |                         |
| 66, 136, 209            |       | 19, 38, 57              |                                         |       |                         |
| 97, 195, 296            |       | 43, 90, 134             |                                         |       |                         |
| 92, 184, 276            |       | 94, 189, 284            |                                         |       |                         |
| 89, 177, 265            |       | 88, 173, 267            |                                         |       |                         |
| 86, 172, 258            |       | 91, 185, 282            |                                         |       |                         |
| 78, 160, 245            |       | 58, 113, 171            |                                         |       |                         |
| 74, 148, 228            |       | 73, 152, 231            |                                         |       |                         |
| 71, 147, 223            |       | 61, 122, 183            |                                         |       |                         |
| 64, 129, 191            |       | 65, 132, 202            |                                         |       |                         |
| 62, 126, 193            |       | 63, 128, 190            |                                         |       |                         |
| 59, 115, 174            |       | 67, 135, 203            |                                         |       |                         |
| 56, 109, 165            |       | 36, 70, 107             |                                         |       |                         |
| 47, 96, 145             |       | 16, 30, 44              |                                         |       |                         |
| 41, 87, 130             |       | 27, 53, 85              |                                         |       |                         |
| 39, 76, 116             |       | 69, 140, 214            |                                         |       |                         |
| 26, 48, 79              |       | 77, 154, 234            |                                         |       |                         |
| 17, 33, 49              |       | 81, 164, 253            |                                         |       |                         |
| Starter                 | Adder | Starter+ Adder          | Starter                                 | Adder | Starter + Adder         |
| 104, 210, 255           | 198   | 2, 108, 153             | 105, 202, 268                           | 218   | 23, 120, 186            |
| 38, 55, 61              | 38    | 76, 93, 99              | 34, 118, 121                            | 261   | 295, 79, 82             |
| 29, 182, 248            | 182   | 211, 64, 130            | 23, 201, 211                            | 16    | 39, 217, 227            |
| 10, 205, 247            | 293   | 3, 198, 240             | 5, 6, 146                               | 105   | 110, 111, 251           |
| 3, 27, 285              | 4     | 7, 31, 289              | 1, 2, 4                                 | 297   | 298, 299, 1             |
| 53, 214, 266            | 235   | 288, 149, 201           | 51, 120, 132                            | 209   | 260, 29, 41             |
| 18, 28, 298             | 98    | 116, 126, 96            | 13, 22, 65                              | 165   | 178, 187, 230           |
| 11, 15, 19              | 207   | 218, 222, 226           | 9, 14, 16                               | 26    | 35, 40, 42              |
| 8, 44, 67               | 138   | 146, 182, 205           | 37, 68, 286                             | 29    | 66, 97, 15              |
| 32, 73, 212             | 244   | 276, 17, 156            | 30, 57, 240                             | 288   | 18, 45, 228             |
| 24, 31, 52              | 211   | 235, 242, 263           | 21, 36, 297                             | 65    | 86, 101, 62             |
| 46, 186, 215            | 223   | 269, 109, 138           | 45, 81, 114                             | 199   | 244, 280, 13            |
| 43, 139, 222            | 290   | 33, 129, 212            | 42, 72, 99                              | 194   | 236, 266, 293           |
| 40, 94, 112             | 193   | 233, 287, 5             | 63, 108, 204                            | 73    | 136, 181, 277           |
| 60, 95, 159             | 112   | 172, 207, 271           | 58, 91, 151                             | 48    | 106, 139, 199           |
| 88, 199, 234            | 153   | 241, 52, 87             | 82, 196, 244                            | 252   | 34, 148, 196            |
| 84, 213, 270            | 135   | 219, 48, 105            | 83, 138, 216                            | 156   | 239, 294, 72            |
| 77, 106, 179            | 245   | 22, 51, 124             | 70, 110, 173                            | 136   | 206, 246, 9             |
| 69, 207, 246            | 101   | 170, 8, 47              | 103, 181, 229                           | 91    | 194, 272, 20            |
| 102, 206, 290           | 257   | 59, 163, 247            | 101, 254, 267                           | 14    | 115, 268, 281           |
| 93, 183, 227            | 10    | 103, 193, 237           | 90, 141, 260                            | 120   | 210, 261, 80            |
| 171, 289, $\infty_0$    | 85    | 256, 74, $\infty_0$     | 122, 232, $\infty_1$                    | 234   | 56, 166, $\infty_1$     |
| 85, 217, $\infty_2$     | 206   | 291, 123, $\infty_2$    | 153, 264, $\infty_3$                    | 215   | 68, 179, $\infty_3$     |
| 154, 277, $\infty_4$    | 94    | 248, 71, $\infty_4$     | 117, 221, $\infty_5$                    | 24    | 141, 245, $\infty_5$    |
| 164, 198, $\infty_6$    | 219   | 83, 117, $\infty_6$     | 168, 292, $\infty_7$                    | 224   | 92, 216, $\infty_7$     |
| 131, 239, $\infty_8$    | 53    | 184, 292, $\infty_8$    | 158, 293, $\infty_9$                    | 62    | 220, 55, $\infty_9$     |
| 163, 282, $\infty_{10}$ | 151   | 14, 133, $\infty_{10}$  | 162, 288, $\infty_{11}$                 | 61    | 223, 49, $\infty_{11}$  |
| 134, 242, $\infty_{12}$ | 220   | 54, 162, $\infty_{12}$  | 140, 295, $\infty_{13}$                 | 117   | 257, 112, $\infty_{13}$ |
| 149, 284, $\infty_{14}$ | 229   | 78, 213, $\infty_{14}$  | 188, 226, $\infty_{15}$                 | 172   | 60, 98, $\infty_{15}$   |
| 143, 190, $\infty_{16}$ | 116   | 259, 6, $\infty_{16}$   | 144, 251, $\infty_{17}$                 | 240   | 84, 191, $\infty_{17}$  |
| 152, 294, $\infty_{18}$ | 17    | 169, 11, $\infty_{18}$  | 273, 279, $\infty_{19}$                 | 259   | 232, 238, $\infty_{19}$ |
| 252, 278, $\infty_{20}$ | 243   | 195, 221, $\infty_{20}$ | 180, 192, $\infty_{21}$                 | 296   | 176, 188, $\infty_{21}$ |
| 135, 241, $\infty_{22}$ | 283   | 118, 224, $\infty_{22}$ | 156, 263, $\infty_{23}$                 | 286   | 142, 249, $\infty_{23}$ |
| 157, 274, $\infty_{24}$ | 280   | 137, 254, $\infty_{24}$ | 220, 237, $\infty_{25}$                 | 260   | 180, 197, $\infty_{25}$ |
| 167, 280, $\infty_{26}$ | 278   | 145, 258, $\infty_{26}$ | 127, 283, $\infty_{27}$                 | 177   | 4, 160, $\infty_{27}$   |
| 137, 236, $\infty_{28}$ | 92    | 229, 28, $\infty_{28}$  | 189, 235, $\infty_{29}$                 | 242   | 131, 177, $\infty_{29}$ |
| 155, 271, $\infty_{30}$ | 124   | 279, 95, $\infty_{30}$  | 133, 238, $\infty_{31}$                 | 59    | 192, 297, $\infty_{31}$ |
| 128, 231, $\infty_{32}$ | 31    | 159, 262, $\infty_{32}$ | 161, 291, $\infty_{33}$                 | 113   | 274, 104, $\infty_{33}$ |
| 166, 281, $\infty_{34}$ | 292   | 158, 273, $\infty_{34}$ | 169, 287, $\infty_{35}$                 | 299   | 168, 286, $\infty_{35}$ |
| 123, 259, $\infty_{36}$ | 155   | 278, 114, $\infty_{36}$ | 124, 253, $\infty_{37}$                 | 166   | 290, 119, $\infty_{37}$ |
| 142, 262, $\infty_{38}$ | 195   | 37, 157, $\infty_{38}$  | 170, 272, $\infty_{39}$                 | 232   | 102, 204, $\infty_{39}$ |
| 178, 219, $\infty_{40}$ | 289   | 167, 208, $\infty_{40}$ | 176, 230, $\infty_{41}$                 | 279   | 155, 209, $\infty_{41}$ |
| 35, 187, $\infty_{42}$  | 139   | 174, 26, $\infty_{42}$  | 107, 256, $\infty_{43}$                 | 205   | 12, 161, $\infty_{43}$  |
| 249, 269, $\infty_{44}$ | 178   | 127, 147, $\infty_{44}$ | 218, 233, $\infty_{45}$                 | 52    | 270, 285, $\infty_{45}$ |
| 208, 299, $\infty_{46}$ | 47    | 255, 46, $\infty_{46}$  | 197, 257, $\infty_{47}$                 | 67    | 264, 24, $\infty_{47}$  |
| 194, 203, $\infty_{48}$ | 49    | 243, 252, $\infty_{48}$ | 113, 185, $\infty_{49}$                 | 30    | 143, 215, $\infty_{49}$ |
| 111, 243, $\infty_{50}$ | 40    | 151, 283, $\infty_{50}$ | 98, 119, $\infty_{51}$                  | 46    | 144, 165, $\infty_{51}$ |
| 80, 224, $\infty_{52}$  | 41    | 121, 265, $\infty_{52}$ | 54, 261, $\infty_{53}$                  | 35    | 89, 296, $\infty_{53}$  |

**Table E**  $(S, C, R)$  and  $A$  for a  $(1, 2; 3)$ -frame of type  $15^9 21^1$ 

| C                       |       | R                       | A $(1, 2, 3)$ -frame of type $15^9 21^1$ |       |                        |
|-------------------------|-------|-------------------------|------------------------------------------|-------|------------------------|
| 7, 14, 24               |       | 4, 6, 11                |                                          |       |                        |
| 20, 37, 57              |       | 13, 23, 39              |                                          |       |                        |
| 29, 51, 79              |       | 25, 48, 68              |                                          |       |                        |
| 42, 76, 116             |       | 40, 74, 111             |                                          |       |                        |
| 35, 67, 102             |       | 49, 84, 125             |                                          |       |                        |
| 15, 26, 34              |       | 38, 69, 100             |                                          |       |                        |
| 46, 86, 129             |       | 19, 33, 47              |                                          |       |                        |
| Starter                 | Adder | Starter+ Adder          | Starter                                  | Adder | Starter + Adder        |
| 38, 59, 124             | 8     | 46, 67, 132             | 39, 78, 91                               | 13    | 52, 91, 104            |
| 55, 87, 133             | 7     | 62, 94, 5               | 58, 83, 131                              | 12    | 70, 95, 8              |
| 11, 23, 44              | 20    | 31, 43, 64              | 41, 64, 70                               | 15    | 56, 79, 85             |
| 19, 104, 110            | 10    | 29, 114, 120            | 16, 65, 94                               | 37    | 53, 102, 131           |
| 50, 89, 127             | 23    | 73, 112, 15             | 32, 56, 98                               | 65    | 97, 121, 28            |
| 6, 25, 130              | 26    | 32, 51, 21              | 5, 10, 92                                | 50    | 55, 60, 7              |
| 4, 8, 101               | 22    | 26, 30, 123             | 1, 120, 121                              | 16    | 17, 1, 2               |
| 40, 73, 114             | 2     | 42, 75, 116             | 31, 95, 107                              | 6     | 37, 101, 113           |
| 21, 47, 112             | 3     | 24, 50, 115             | 17, 30, 77                               | 5     | 22, 35, 82             |
| 13, 43, 123             | 1     | 14, 44, 124             | 2, 134, $\infty_0$                       | 120   | 122, 119, $\infty_0$   |
| 3, 80, $\infty_1$       | 75    | 78, 20, $\infty_1$      | 12, 132, $\infty_2$                      | 86    | 98, 83, $\infty_2$     |
| 28, 75, $\infty_3$      | 52    | 80, 127, $\infty_3$     | 33, 84, $\infty_4$                       | 25    | 58, 109, $\infty_4$    |
| 48, 103, $\infty_5$     | 44    | 92, 12, $\infty_5$      | 49, 100, $\infty_6$                      | 69    | 118, 34, $\infty_6$    |
| 52, 119, $\infty_7$     | 77    | 129, 61, $\infty_7$     | 60, 68, $\infty_8$                       | 28    | 88, 96, $\infty_8$     |
| 61, 85, $\infty_9$      | 4     | 65, 89, $\infty_9$      | 93, 97, $\infty_{10}$                    | 41    | 134, 3, $\infty_{10}$  |
| 96, 118, $\infty_{11}$  | 110   | 71, 93, $\infty_{11}$   | 105, 106, $\infty_{12}$                  | 116   | 86, 87, $\infty_{12}$  |
| 109, 111, $\infty_{13}$ | 131   | 105, 107, $\infty_{13}$ | 82, 128, $\infty_{14}$                   | 48    | 130, 41, $\infty_{14}$ |
| 71, 74, $\infty_{15}$   | 32    | 103, 106, $\infty_{15}$ | 69, 125, $\infty_{16}$                   | 76    | 10, 66, $\infty_{16}$  |
| 66, 122, $\infty_{17}$  | 11    | 77, 133, $\infty_{17}$  | 62, 115, $\infty_{18}$                   | 130   | 57, 110, $\infty_{18}$ |
| 53, 113, $\infty_{19}$  | 98    | 16, 76, $\infty_{19}$   | 22, 88, $\infty_{20}$                    | 106   | 128, 59, $\infty_{20}$ |

**Table F**  $(S, C, R)$  and  $A$  for  $(1, 2; 3)$ -frames of type  $18^u(3\ell)^1$ 

| C                     |       | R                     | A $(1, 2, 3)$ -frame of type $18^5 18^1$ |       |                       |
|-----------------------|-------|-----------------------|------------------------------------------|-------|-----------------------|
| 7, 11, 18             |       | 22, 39, 56            |                                          |       |                       |
| 9, 16, 32             |       | 28, 57, 86            |                                          |       |                       |
| 23, 49, 87            |       | 24, 52, 83            |                                          |       |                       |
| 37, 59, 81            |       | 14, 27, 46            |                                          |       |                       |
| 19, 33, 47            |       | 4, 6, 17              |                                          |       |                       |
| 13, 21, 29            |       | 8, 12, 31             |                                          |       |                       |
|                       |       |                       |                                          |       |                       |
| Starter               | Adder | Starter+ Adder        | Starter                                  | Adder | Starter + Adder       |
| 27, 63, 84            | 9     | 36, 72, 3             | 14, 26, 53                               | 18    | 32, 44, 71            |
| 8, 17, 51             | 26    | 34, 43, 77            | 1, 2, 3                                  | 46    | 47, 48, 49            |
| 4, 22, 28             | 59    | 63, 81, 87            | 6, 12, 48                                | 61    | 67, 73, 19            |
| 24, 73, $\infty_0$    | 38    | 62, 21, $\infty_0$    | 31, 69, $\infty_1$                       | 22    | 53, 1, $\infty_1$     |
| 34, 67, $\infty_2$    | 17    | 51, 84, $\infty_2$    | 36, 77, $\infty_3$                       | 87    | 33, 74, $\infty_3$    |
| 39, 78, $\infty_4$    | 88    | 37, 76, $\infty_4$    | 42, 79, $\infty_5$                       | 24    | 66, 13, $\infty_5$    |
| 43, 86, $\infty_6$    | 11    | 54, 7, $\infty_6$     | 46, 88, $\infty_7$                       | 43    | 89, 41, $\infty_7$    |
| 52, 89, $\infty_8$    | 12    | 64, 11, $\infty_8$    | 54, 72, $\infty_9$                       | 34    | 88, 16, $\infty_9$    |
| 56, 83, $\infty_{10}$ | 36    | 2, 29, $\infty_{10}$  | 57, 66, $\infty_{11}$                    | 2     | 59, 68, $\infty_{11}$ |
| 58, 61, $\infty_{12}$ | 21    | 79, 82, $\infty_{12}$ | 64, 76, $\infty_{13}$                    | 52    | 26, 38, $\infty_{13}$ |
| 71, 74, $\infty_{14}$ | 77    | 58, 61, $\infty_{14}$ | 41, 62, $\infty_{15}$                    | 37    | 78, 9, $\infty_{15}$  |
| 44, 68, $\infty_{16}$ | 64    | 18, 42, $\infty_{16}$ | 38, 82, $\infty_{17}$                    | 31    | 69, 23, $\infty_{17}$ |

Table F (Cont.) (S,C,R) and A for (1,2,3)-frames of type  $18^u(3\ell)^1$ 

| C                                                                                                                                                                                                                                                                                                                                                                                                                                                                                                        |                                                                                                                                                                          | R                                                                                                                                                                                                                                                                                                                                                                                                                                                                                                         | A (1,2,3)-frame of type $18^7 18^1$                                                                                                                                                                                                                                                                                                                                                                                                                                                                 |                                                                                                                                                                             |                                                                                                                                                                                                                                                                                                                                                                                                                                                                                                            |
|----------------------------------------------------------------------------------------------------------------------------------------------------------------------------------------------------------------------------------------------------------------------------------------------------------------------------------------------------------------------------------------------------------------------------------------------------------------------------------------------------------|--------------------------------------------------------------------------------------------------------------------------------------------------------------------------|-----------------------------------------------------------------------------------------------------------------------------------------------------------------------------------------------------------------------------------------------------------------------------------------------------------------------------------------------------------------------------------------------------------------------------------------------------------------------------------------------------------|-----------------------------------------------------------------------------------------------------------------------------------------------------------------------------------------------------------------------------------------------------------------------------------------------------------------------------------------------------------------------------------------------------------------------------------------------------------------------------------------------------|-----------------------------------------------------------------------------------------------------------------------------------------------------------------------------|------------------------------------------------------------------------------------------------------------------------------------------------------------------------------------------------------------------------------------------------------------------------------------------------------------------------------------------------------------------------------------------------------------------------------------------------------------------------------------------------------------|
| 10, 15, 20<br>12, 29, 46<br>23, 43, 69<br>30, 61, 92<br>32, 64, 93<br>40, 80, 120                                                                                                                                                                                                                                                                                                                                                                                                                        |                                                                                                                                                                          | 33, 71, 109<br>36, 73, 110<br>19, 39, 62<br>18, 37, 59<br>25, 47, 72<br>31, 57, 86                                                                                                                                                                                                                                                                                                                                                                                                                        |                                                                                                                                                                                                                                                                                                                                                                                                                                                                                                     |                                                                                                                                                                             |                                                                                                                                                                                                                                                                                                                                                                                                                                                                                                            |
| Starter                                                                                                                                                                                                                                                                                                                                                                                                                                                                                                  | Adder                                                                                                                                                                    | Starter+ Adder                                                                                                                                                                                                                                                                                                                                                                                                                                                                                            | Starter                                                                                                                                                                                                                                                                                                                                                                                                                                                                                             | Adder                                                                                                                                                                       | Starter + Adder                                                                                                                                                                                                                                                                                                                                                                                                                                                                                            |
| 33, 66, 102<br>27, 81, 89<br>39, 73, 121<br>53, 78, 110<br>47, 86, 125<br>44, 62, 109<br>4, 6, 16<br>9, 13, 22<br>19, 25, 52<br>36, 88, $\infty_0$<br>41, 57, $\infty_2$<br>59, 104, $\infty_4$<br>72, 83, $\infty_6$<br>76, 117, $\infty_8$<br>100, 116, $\infty_{10}$<br>111, 115, $\infty_{12}$<br>54, 107, $\infty_{14}$<br>68, 87, $\infty_{16}$                                                                                                                                                    | 1<br>11<br>2<br>15<br>4<br>34<br>16<br>52<br>97<br>51<br>109<br>76<br>41<br>39<br>86<br>96<br>99<br>31                                                                   | 34, 67, 103<br>38, 92, 100<br>41, 75, 123<br>68, 93, 125<br>51, 90, 3<br>78, 96, 17<br>20, 22, 32<br>61, 65, 74<br>116, 122, 23<br>87, 13, $\infty_0$<br>24, 40, $\infty_2$<br>9, 54, $\infty_4$<br>113, 124, $\infty_6$<br>115, 30, $\infty_8$<br>60, 76, $\infty_{10}$<br>81, 85, $\infty_{12}$<br>27, 80, $\infty_{14}$<br>99, 118, $\infty_{16}$                                                                                                                                                      | 31, 67, 82<br>55, 85, 108<br>38, 96, 114<br>50, 95, 122<br>45, 58, 113<br>1, 2, 3<br>5, 8, 17<br>18, 24, 48<br>26, 34, 101<br>37, 97, $\infty_1$<br>51, 94, $\infty_3$<br>60, 75, $\infty_5$<br>74, 118, $\infty_7$<br>99, 123, $\infty_9$<br>103, 106, $\infty_{11}$<br>11, 71, $\infty_{13}$<br>65, 124, $\infty_{15}$<br>79, 90, $\infty_{17}$                                                                                                                                                   | 12<br>3<br>6<br>19<br>8<br>9<br>47<br>83<br>108<br>58<br>38<br>22<br>54<br>53<br>24<br>37<br>106<br>27                                                                      | 43, 79, 94<br>58, 88, 111<br>44, 102, 120<br>69, 114, 15<br>53, 66, 121<br>10, 11, 12<br>52, 55, 64<br>101, 107, 5<br>8, 16, 83<br>95, 29, $\infty_1$<br>89, 6, $\infty_3$<br>82, 97, $\infty_5$<br>2, 46, $\infty_7$<br>26, 50, $\infty_9$<br>1, 4, $\infty_{11}$<br>48, 108, $\infty_{13}$<br>45, 104, $\infty_{15}$<br>106, 117, $\infty_{17}$                                                                                                                                                          |
| C                                                                                                                                                                                                                                                                                                                                                                                                                                                                                                        |                                                                                                                                                                          | R                                                                                                                                                                                                                                                                                                                                                                                                                                                                                                         | A (1,2,3)-frame of type $18^{10} 18^1$                                                                                                                                                                                                                                                                                                                                                                                                                                                              |                                                                                                                                                                             |                                                                                                                                                                                                                                                                                                                                                                                                                                                                                                            |
| 58, 113, 174<br>55, 111, 176<br>46, 89, 135<br>44, 87, 133<br>39, 77, 115<br>36, 68, 103                                                                                                                                                                                                                                                                                                                                                                                                                 |                                                                                                                                                                          | 28, 62, 99<br>24, 47, 73<br>26, 54, 88<br>19, 38, 63<br>17, 34, 48<br>25, 53, 78                                                                                                                                                                                                                                                                                                                                                                                                                          |                                                                                                                                                                                                                                                                                                                                                                                                                                                                                                     |                                                                                                                                                                             |                                                                                                                                                                                                                                                                                                                                                                                                                                                                                                            |
| Starter                                                                                                                                                                                                                                                                                                                                                                                                                                                                                                  | Adder                                                                                                                                                                    | Starter+ Adder                                                                                                                                                                                                                                                                                                                                                                                                                                                                                            | Starter                                                                                                                                                                                                                                                                                                                                                                                                                                                                                             | Adder                                                                                                                                                                       | Starter + Adder                                                                                                                                                                                                                                                                                                                                                                                                                                                                                            |
| 7, 11, 16<br>14, 62, 86<br>4, 6, 163<br>26, 101, 137<br>17, 28, 41<br>64, 127, 149<br>33, 49, 107<br>22, 34, 48<br>81, 148, 177<br>37, 116, 143<br>51, 73, 129<br>53, 106, 172<br>79, 112, 144<br>57, 99, 156<br>65, 109, 168<br>21, 29, 98<br>71, 152, 173<br>75, 122, 169<br>42, 158, $\infty_0$<br>66, 154, $\infty_2$<br>72, 126, $\infty_4$<br>84, 141, $\infty_6$<br>88, 93, $\infty_8$<br>96, 178, $\infty_{10}$<br>102, 157, $\infty_{12}$<br>121, 136, $\infty_{14}$<br>132, 139, $\infty_{16}$ | 155<br>43<br>2<br>7<br>108<br>147<br>142<br>49<br>54<br>12<br>112<br>31<br>153<br>139<br>9<br>16<br>5<br>164<br>131<br>117<br>89<br>111<br>79<br>149<br>144<br>58<br>137 | 162, 166, 171<br>57, 105, 129<br>6, 8, 165<br>33, 108, 144<br>125, 136, 149<br>31, 94, 116<br>175, 11, 69<br>71, 83, 97<br>135, 22, 51<br>49, 128, 155<br>163, 5, 61<br>84, 137, 23<br>52, 85, 117<br>16, 58, 115<br>74, 118, 177<br>37, 45, 114<br>76, 157, 178<br>59, 106, 153<br>173, 109, $\infty_0$<br>3, 91, $\infty_2$<br>161, 35, $\infty_4$<br>15, 72, $\infty_6$<br>167, 172, $\infty_8$<br>65, 147, $\infty_{10}$<br>66, 121, $\infty_{12}$<br>179, 14, $\infty_{14}$<br>89, 96, $\infty_{16}$ | 13, 19, 25<br>1, 2, 3<br>24, 43, 59<br>15, 23, 32<br>18, 31, 125<br>27, 45, 63<br>35, 108, 147<br>67, 146, 175<br>82, 134, 167<br>38, 104, 131<br>52, 114, 145<br>78, 117, 162<br>54, 91, 142<br>61, 124, 165<br>76, 118, 159<br>8, 56, 105<br>74, 128, 179<br>5, 9, 12<br>47, 92, $\infty_1$<br>69, 151, $\infty_3$<br>83, 94, $\infty_5$<br>85, 153, $\infty_7$<br>95, 166, $\infty_9$<br>97, 155, $\infty_{11}$<br>119, 171, $\infty_{13}$<br>123, 138, $\infty_{15}$<br>161, 164, $\infty_{17}$ | 126<br>41<br>109<br>161<br>123<br>48<br>51<br>46<br>125<br>171<br>122<br>64<br>47<br>158<br>28<br>156<br>3<br>114<br>56<br>65<br>75<br>159<br>106<br>1<br>116<br>124<br>143 | 139, 145, 151<br>42, 43, 44<br>133, 152, 168<br>176, 4, 13<br>141, 154, 68<br>75, 93, 111<br>86, 159, 18<br>113, 12, 41<br>27, 79, 112<br>29, 95, 122<br>174, 56, 87<br>142, 1, 46<br>101, 138, 9<br>39, 102, 143<br>104, 146, 7<br>164, 32, 81<br>77, 131, 2<br>119, 123, 126<br>103, 148, $\infty_1$<br>134, 36, $\infty_3$<br>158, 169, $\infty_5$<br>64, 132, $\infty_7$<br>21, 92, $\infty_9$<br>98, 156, $\infty_{11}$<br>55, 107, $\infty_{13}$<br>67, 82, $\infty_{15}$<br>124, 127, $\infty_{17}$ |

Table F (Cont.) (S,C,R) and A for (1,2,3)-frames of type  $18^u(3\ell)^1$ 

| C                       |       | R                       | A (1,2,3)-frame of type $18^{11}18^1$ |       |                         |
|-------------------------|-------|-------------------------|---------------------------------------|-------|-------------------------|
| 64, 123, 182            |       | 31, 59, 93              |                                       |       |                         |
| 62, 126, 190            |       | 27, 56, 85              |                                       |       |                         |
| 60, 113, 169            |       | 24, 47, 70              |                                       |       |                         |
| 45, 94, 146             |       | 19, 36, 50              |                                       |       |                         |
| 42, 89, 136             |       | 10, 23, 30              |                                       |       |                         |
| 38, 78, 118             |       | 7, 12, 17               |                                       |       |                         |
| Starter                 | Adder | Starter+ Adder          | Starter                               | Adder | Starter + Adder         |
| 82, 139, 193            | 87    | 169, 28, 82             | 79, 142, 195                          | 19    | 98, 161, 16             |
| 74, 122, 183            | 64    | 138, 186, 49            | 75, 131, 189                          | 190   | 67, 123, 181            |
| 76, 133, 184            | 116   | 192, 51, 102            | 1, 2, 3                               | 78    | 79, 80, 81              |
| 4, 6, 10                | 59    | 63, 65, 69              | 9, 16, 102                            | 97    | 106, 113, 1             |
| 7, 15, 27               | 153   | 160, 168, 180           | 5, 8, 14                              | 1     | 6, 9, 15                |
| 12, 37, 46              | 160   | 172, 197, 8             | 13, 25, 40                            | 105   | 118, 130, 145           |
| 18, 28, 54              | 146   | 164, 174, 2             | 26, 152, 178                          | 98    | 124, 52, 78             |
| 24, 48, 117             | 24    | 48, 72, 141             | 19, 34, 50                            | 123   | 142, 157, 173           |
| 20, 115, 140            | 129   | 149, 46, 71             | 30, 95, 149                           | 53    | 83, 148, 4              |
| 29, 47, 68              | 47    | 76, 94, 115             | 41, 109, 144                          | 50    | 91, 159, 194            |
| 31, 105, 129            | 42    | 73, 147, 171            | 21, 39, 53                            | 80    | 101, 119, 133           |
| 71, 101, 168            | 25    | 96, 126, 193            | 70, 98, 174                           | 113   | 183, 13, 89             |
| 69, 106, 180            | 56    | 125, 162, 38            | 32, 124, 151                          | 28    | 60, 152, 179            |
| 36, 103, 138            | 134   | 170, 39, 74             | 81, 111, 171                          | 85    | 166, 196, 58            |
| 51, 92, 167             | 167   | 20, 61, 136             | 49, 91, 175                           | 60    | 109, 151, 37            |
| 87, 158, 194            | 195   | 84, 155, 191            | 93, 130, 162                          | 173   | 68, 105, 137            |
| 59, 119, 192            | 3     | 62, 122, 195            | 57, 127, 172                          | 51    | 108, 178, 25            |
| 52, 90, 128             | 111   | 163, 3, 41              | 61, 100, 191                          | 124   | 185, 26, 117            |
| 86, 147, 188            | 96    | 182, 45, 86             | 73, 125, 173                          | 115   | 188, 42, 90             |
| 65, 114, 157            | 32    | 97, 146, 189            | 63, 108, 186                          | 76    | 139, 184, 64            |
| 83, 145, 196            | 45    | 128, 190, 43            | 84, 134, 197                          | 93    | 177, 29, 92             |
| 17, 67, $\infty_0$      | 37    | 54, 104, $\infty_0$     | 23, 104, $\infty_1$                   | 52    | 75, 156, $\infty_1$     |
| 35, 43, $\infty_2$      | 92    | 127, 135, $\infty_2$    | 56, 181, $\infty_3$                   | 31    | 87, 14, $\infty_3$      |
| 58, 170, $\infty_4$     | 49    | 107, 21, $\infty_4$     | 72, 153, $\infty_5$                   | 179   | 53, 134, $\infty_5$     |
| 80, 163, $\infty_6$     | 40    | 120, 5, $\infty_6$      | 85, 156, $\infty_7$                   | 82    | 167, 40, $\infty_7$     |
| 96, 112, $\infty_8$     | 120   | 18, 34, $\infty_8$      | 97, 116, $\infty_9$                   | 15    | 112, 131, $\infty_9$    |
| 107, 150, $\infty_{10}$ | 148   | 57, 100, $\infty_{10}$  | 120, 141, $\infty_{11}$               | 9     | 129, 150, $\infty_{11}$ |
| 135, 148, $\infty_{12}$ | 166   | 103, 116, $\infty_{12}$ | 137, 179, $\infty_{13}$               | 172   | 111, 153, $\infty_{13}$ |
| 155, 159, $\infty_{14}$ | 183   | 140, 144, $\infty_{14}$ | 160, 177, $\infty_{15}$               | 196   | 158, 175, $\infty_{15}$ |
| 161, 164, $\infty_{16}$ | 69    | 32, 35, $\infty_{16}$   | 166, 185, $\infty_{17}$               | 127   | 95, 114, $\infty_{17}$  |



Table F (Cont.) (S,C,R) and A for (1,2;3)-frames of type  $18^u(3\ell)^1$ 

| C                       |       | R                       | A (1,2,3)-frame of type $18^{13}18^1$ |       |                         |
|-------------------------|-------|-------------------------|---------------------------------------|-------|-------------------------|
| 76, 158, 228            |       | 44, 93, 139             |                                       |       |                         |
| 72, 146, 217            |       | 33, 67, 101             |                                       |       |                         |
| 68, 132, 196            |       | 37, 75, 116             |                                       |       |                         |
| 57, 118, 179            |       | 40, 81, 125             |                                       |       |                         |
| 51, 109, 164            |       | 19, 38, 63              |                                       |       |                         |
| 48, 95, 142             |       | 27, 55, 80              |                                       |       |                         |
| Starter                 | Adder | Starter+ Adder          | Starter                               | Adder | Starter + Adder         |
| 36, 55, 79              | 18    | 54, 73, 97              | 47, 166, 193                          | 10    | 57, 176, 203            |
| 45, 148, 178            | 50    | 95, 198, 228            | 44, 73, 123                           | 101   | 145, 174, 224           |
| 93, 159, 219            | 233   | 92, 158, 218            | 80, 170, 191                          | 67    | 147, 3, 24              |
| 74, 102, 194            | 90    | 164, 192, 50            | 97, 129, 197                          | 15    | 112, 144, 212           |
| 92, 127, 202            | 115   | 207, 8, 83              | 5, 8, 12                              | 192   | 197, 200, 204           |
| 56, 140, 188            | 38    | 94, 178, 226            | 50, 81, 201                           | 133   | 183, 214, 100           |
| 113, 150, 187           | 22    | 135, 172, 209           | 106, 144, 186                         | 138   | 10, 48, 90              |
| 18, 29, 40              | 81    | 99, 110, 121            | 64, 131, 203                          | 74    | 138, 205, 43            |
| 63, 149, 200            | 110   | 173, 25, 76             | 107, 147, 222                         | 161   | 34, 74, 149             |
| 71, 111, 213            | 183   | 20, 60, 162             | 37, 134, 214                          | 31    | 68, 165, 11             |
| 67, 136, 185            | 4     | 71, 140, 189            | 66, 108, 153                          | 53    | 119, 161, 206           |
| 105, 161, 215           | 96    | 201, 23, 77             | 103, 180, 231                         | 163   | 32, 109, 160            |
| 94, 125, 206            | 126   | 220, 17, 98             | 82, 128, 209                          | 193   | 41, 87, 168             |
| 75, 151, 210            | 28    | 103, 179, 4             | 99, 168, 224                          | 12    | 111, 180, 2             |
| 87, 145, 218            | 72    | 159, 217, 56            | 62, 124, 220                          | 86    | 148, 210, 72            |
| 84, 167, 229            | 180   | 30, 113, 175            | 83, 138, 192                          | 103   | 186, 7, 61              |
| 98, 165, 225            | 200   | 64, 131, 191            | 96, 155, 232                          | 61    | 157, 216, 59            |
| 100, 184, 216           | 152   | 18, 102, 134            | 90, 160, 226                          | 189   | 45, 115, 181            |
| 89, 152, 223            | 77    | 166, 229, 66            | 1, 2, 3                               | 125   | 126, 127, 128           |
| 4, 6, 9                 | 80    | 84, 86, 89              | 70, 115, 211                          | 37    | 107, 152, 14            |
| 7, 11, 16               | 42    | 49, 53, 58              | 10, 17, 25                            | 205   | 215, 222, 230           |
| 14, 20, 28              | 1     | 15, 21, 29              | 15, 21, 30                            | 172   | 187, 193, 202           |
| 101, 154, 227           | 203   | 70, 123, 196            | 19, 31, 41                            | 136   | 155, 167, 177           |
| 22, 32, 46              | 100   | 122, 132, 146           | 23, 58, 163                           | 113   | 136, 171, 42            |
| 24, 42, 54              | 64    | 88, 106, 118            | 86, 173, 230                          | 146   | 232, 85, 142            |
| 38, 110, 139            | 232   | 36, 108, 137            | 27, 43, 60                            | 196   | 223, 5, 22              |
| 33, 49, 69              | 121   | 154, 170, 190           | 34, 120, 183                          | 165   | 199, 51, 114            |
| 35, 85, $\infty_0$      | 150   | 185, 1, $\infty_0$      | 53, 141, $\infty_1$                   | 9     | 62, 150, $\infty_1$     |
| 59, 172, $\infty_2$     | 191   | 16, 129, $\infty_2$     | 61, 190, $\infty_3$                   | 21    | 82, 211, $\infty_3$     |
| 77, 176, $\infty_4$     | 43    | 120, 219, $\infty_4$    | 88, 121, $\infty_5$                   | 106   | 194, 227, $\infty_5$    |
| 112, 205, $\infty_6$    | 153   | 31, 124, $\infty_6$     | 114, 135, $\infty_7$                  | 49    | 163, 184, $\infty_7$    |
| 116, 133, $\infty_8$    | 197   | 79, 96, $\infty_8$      | 119, 162, $\infty_9$                  | 69    | 188, 231, $\infty_9$    |
| 122, 233, $\infty_{10}$ | 29    | 151, 28, $\infty_{10}$  | 126, 174, $\infty_{11}$               | 107   | 233, 47, $\infty_{11}$  |
| 137, 157, $\infty_{12}$ | 230   | 133, 153, $\infty_{12}$ | 171, 207, $\infty_{13}$               | 168   | 105, 141, $\infty_{13}$ |
| 175, 198, $\infty_{14}$ | 105   | 46, 69, $\infty_{14}$   | 177, 204, $\infty_{15}$               | 36    | 213, 6, $\infty_{15}$   |
| 181, 199, $\infty_{16}$ | 44    | 225, 9, $\infty_{16}$   | 189, 212, $\infty_{17}$               | 57    | 12, 35, $\infty_{17}$   |

Table F (Cont.) (S,C,R) and A for (1,2;3)-frames of type  $18^u(3\ell)^1$ 

| C                                                                                      |       | R                                                                                       | A (1,2,3)-frame of type $18^{14}18^1$ |       |                         |
|----------------------------------------------------------------------------------------|-------|-----------------------------------------------------------------------------------------|---------------------------------------|-------|-------------------------|
| 8, 15, 25<br>18, 35, 55<br>46, 93, 143<br>67, 135, 206<br>81, 164, 247<br>59, 114, 172 |       | 29, 58, 87<br>36, 71, 109<br>74, 141, 217<br>78, 155, 241<br>22, 44, 69<br>51, 101, 160 |                                       |       |                         |
| Starter                                                                                | Adder | Starter+ Adder                                                                          | Starter                               | Adder | Starter + Adder         |
| 1, 2, 3                                                                                | 101   | 102, 103, 104                                                                           | 4, 6, 9                               | 222   | 226, 228, 231           |
| 5, 10, 13                                                                              | 157   | 162, 167, 170                                                                           | 7, 11, 17                             | 251   | 6, 10, 16               |
| 12, 16, 23                                                                             | 15    | 27, 31, 38                                                                              | 19, 27, 38                            | 175   | 194, 202, 213           |
| 20, 26, 39                                                                             | 237   | 5, 11, 24                                                                               | 21, 30, 43                            | 9     | 30, 39, 52              |
| 22, 31, 47                                                                             | 99    | 121, 130, 146                                                                           | 24, 36, 48                            | 115   | 139, 151, 163           |
| 29, 44, 60                                                                             | 217   | 246, 9, 25                                                                              | 32, 50, 71                            | 100   | 132, 150, 171           |
| 33, 65, 194                                                                            | 183   | 216, 248, 125                                                                           | 34, 128, 148                          | 186   | 220, 62, 82             |
| 37, 58, 82                                                                             | 163   | 200, 221, 245                                                                           | 40, 63, 89                            | 48    | 88, 111, 137            |
| 41, 142, 190                                                                           | 209   | 250, 99, 147                                                                            | 45, 72, 102                           | 120   | 165, 192, 222           |
| 49, 79, 195                                                                            | 216   | 13, 43, 159                                                                             | 52, 149, 214                          | 241   | 41, 138, 203            |
| 53, 155, 189                                                                           | 180   | 233, 83, 117                                                                            | 85, 151, 184                          | 164   | 249, 63, 96             |
| 87, 119, 207                                                                           | 118   | 205, 237, 73                                                                            | 103, 139, 230                         | 86    | 189, 225, 64            |
| 110, 141, 221                                                                          | 43    | 153, 184, 12                                                                            | 54, 88, 175                           | 36    | 90, 124, 211            |
| 61, 133, 220                                                                           | 198   | 7, 79, 166                                                                              | 62, 99, 204                           | 116   | 178, 215, 68            |
| 64, 167, 202                                                                           | 178   | 242, 93, 128                                                                            | 97, 137, 225                          | 147   | 244, 32, 120            |
| 66, 146, 187                                                                           | 68    | 134, 214, 3                                                                             | 69, 173, 213                          | 128   | 197, 49, 89             |
| 73, 116, 208                                                                           | 63    | 136, 179, 19                                                                            | 106, 200, 243                         | 69    | 175, 17, 60             |
| 113, 157, 235                                                                          | 78    | 191, 235, 61                                                                            | 74, 152, 241                          | 12    | 86, 164, 1              |
| 75, 121, 222                                                                           | 102   | 177, 223, 72                                                                            | 115, 161, 215                         | 172   | 35, 81, 135             |
| 122, 197, 242                                                                          |       | 2, 77, 122                                                                              | 125, 166, 217                         | 81    | 206, 247, 46            |
| 76, 124, 205                                                                           | 34    | 110, 158, 239                                                                           | 77, 159, 211                          | 242   | 67, 149, 201            |
| 80, 132, 228                                                                           | 205   | 33, 85, 181                                                                             | 118, 169, 248                         | 191   | 57, 108, 187            |
| 120, 177, 226                                                                          | 123   | 243, 48, 97                                                                             | 83, 136, 191                          | 235   | 66, 119, 174            |
| 86, 145, 245                                                                           | 87    | 173, 232, 80                                                                            | 90, 150, 223                          | 79    | 169, 229, 50            |
| 91, 176, 236                                                                           | 220   | 59, 144, 204                                                                            | 111, 185, 239                         | 107   | 218, 40, 94             |
| 92, 153, 249                                                                           | 37    | 129, 190, 34                                                                            | 95, 170, 232                          | 57    | 152, 227, 37            |
| 96, 160, 237                                                                           | 80    | 176, 240, 65                                                                            | 108, 171, 233                         | 199   | 55, 118, 180            |
| 109, 181, 244                                                                          | 7     | 116, 188, 251                                                                           | 100, 165, 234                         | 33    | 133, 198, 15            |
| 101, 180, 251                                                                          | 5     | 106, 185, 4                                                                             | 104, 178, 246                         | 82    | 186, 8, 76              |
| 105, 186, 250                                                                          | 22    | 127, 208, 20                                                                            | 107, 174, 240                         | 38    | 145, 212, 26            |
| 51, 227, $\infty_0$                                                                    | 148   | 199, 123, $\infty_0$                                                                    | 57, 219, $\infty_1$                   | 240   | 45, 207, $\infty_1$     |
| 68, 94, $\infty_2$                                                                     | 125   | 193, 219, $\infty_2$                                                                    | 78, 231, $\infty_3$                   | 152   | 230, 131, $\infty_3$    |
| 117, 156, $\infty_4$                                                                   | 119   | 236, 23, $\infty_4$                                                                     | 123, 192, $\infty_5$                  | 243   | 114, 183, $\infty_5$    |
| 127, 209, $\infty_6$                                                                   | 200   | 75, 157, $\infty_6$                                                                     | 129, 147, $\infty_7$                  | 218   | 95, 113, $\infty_7$     |
| 130, 183, $\infty_8$                                                                   | 26    | 156, 209, $\infty_8$                                                                    | 131, 158, $\infty_9$                  | 236   | 115, 142, $\infty_9$    |
| 134, 229, $\infty_{10}$                                                                | 171   | 53, 148, $\infty_{10}$                                                                  | 138, 199, $\infty_{11}$               | 214   | 100, 161, $\infty_{11}$ |
| 144, 188, $\infty_{12}$                                                                | 155   | 47, 91, $\infty_{12}$                                                                   | 162, 198, $\infty_{13}$               | 72    | 234, 18, $\infty_{13}$  |
| 163, 201, $\infty_{14}$                                                                | 194   | 105, 143, $\infty_{14}$                                                                 | 179, 212, $\infty_{15}$               | 94    | 21, 54, $\infty_{15}$   |
| 193, 216, $\infty_{16}$                                                                | 231   | 172, 195, $\infty_{16}$                                                                 | 203, 218, $\infty_{17}$               | 141   | 92, 107, $\infty_{17}$  |

Table F (Cont.) (S,C,R) and A for (1,2;3)-frames of type  $18^u(3\ell)^1$ 

| C                       |       | R                       | A (1,2,3)-frame of type $18^{14}27^1$ |       |                         |
|-------------------------|-------|-------------------------|---------------------------------------|-------|-------------------------|
| 10, 21, 32              |       | 19, 38, 57              |                                       |       |                         |
| 24, 50, 76              |       | 31, 63, 104             |                                       |       |                         |
| 40, 80, 120             |       | 48, 97, 149             |                                       |       |                         |
| 60, 121, 185            |       | 67, 135, 206            |                                       |       |                         |
| 75, 152, 232            |       | 79, 161, 243            |                                       |       |                         |
| 81, 164, 247            |       | 45, 88, 134             |                                       |       |                         |
| 53, 106, 159            |       | 64, 128, 195            |                                       |       |                         |
| 29, 58, 87              |       | 7, 12, 20               |                                       |       |                         |
| 59, 114, 172            |       | 77, 156, 235            |                                       |       |                         |
| Starter                 | Adder | Starter+ Adder          | Starter                               | Adder | Starter + Adder         |
| 118, 161, 233           | 160   | 26, 69, 141             | 65, 189, 239                          | 18    | 83, 207, 5              |
| 66, 142, 214            | 23    | 89, 165, 237            | 99, 188, 223                          | 16    | 115, 204, 239           |
| 108, 198, 243           | 10    | 118, 208, 1             | 117, 166, 217                         | 19    | 136, 185, 236           |
| 67, 103, 190            | 26    | 93, 129, 216            | 69, 115, 222                          | 27    | 96, 142, 249            |
| 72, 180, 221            | 35    | 107, 215, 4             | 73, 192, 228                          | 22    | 95, 214, 250            |
| 113, 176, 251           | 25    | 138, 201, 24            | 74, 178, 229                          | 31    | 105, 209, 8             |
| 91, 151, 236            | 32    | 123, 183, 16            | 109, 175, 246                         | 24    | 133, 199, 18            |
| 111, 165, 213           | 60    | 171, 225, 21            | 97, 157, 216                          | 122   | 219, 27, 86             |
| 92, 146, 203            | 71    | 163, 217, 22            | 94, 153, 230                          | 45    | 139, 198, 23            |
| 95, 183, 244            | 49    | 144, 232, 41            | 96, 158, 227                          | 36    | 132, 194, 11            |
| 107, 173, 249           | 116   | 223, 37, 113            | 100, 162, 235                         | 69    | 169, 231, 52            |
| 102, 167, 248           | 95    | 197, 10, 91             | 104, 179, 242                         | 43    | 147, 222, 33            |
| 105, 174, 241           | 128   | 233, 50, 117            | 1, 2, 3                               | 149   | 150, 151, 152           |
| 13, 20, 26              | 48    | 61, 68, 74              | 7, 11, 19                             | 167   | 174, 178, 186           |
| 5, 8, 12                | 73    | 78, 81, 85              | 4, 6, 9                               | 105   | 109, 111, 114           |
| 15, 46, 138             | 215   | 230, 9, 101             | 23, 41, 61                            | 96    | 119, 137, 157           |
| 22, 38, 54              | 204   | 226, 242, 6             | 18, 27, 36                            | 152   | 170, 179, 188           |
| 16, 141, 234            | 176   | 192, 65, 158            | 25, 37, 47                            | 230   | 3, 15, 25               |
| 39, 63, 204             | 8     | 47, 71, 212             | 35, 62, 83                            | 4     | 39, 66, 87              |
| 34, 57, 78              | 2     | 36, 59, 80              | 33, 77, 163                           | 13    | 46, 90, 176             |
| 43, 68, 93              | 134   | 177, 202, 227           | 49, 139, 207                          | 6     | 55, 145, 213            |
| 48, 122, 156            | 3     | 51, 125, 159            | 45, 110, 201                          | 17    | 62, 127, 218            |
| 44, 71, 101             | 5     | 49, 76, 106             | 51, 160, 193                          | 7     | 58, 167, 200            |
| 90, 137, 237            | 9     | 99, 146, 246            | 89, 144, 240                          | 11    | 100, 155, 251           |
| 88, 123, 245            | 20    | 108, 143, 13            | 52, 145, 184                          | 21    | 73, 166, 205            |
| 116, 147, 225           | 44    | 160, 191, 17            | 30, 197, $\infty_0$                   | 157   | 187, 102, $\infty_0$    |
| 31, 64, $\infty_1$      | 117   | 148, 181, $\infty_1$    | 55, 215, $\infty_2$                   | 66    | 121, 29, $\infty_2$     |
| 79, 199, $\infty_3$     | 217   | 44, 164, $\infty_3$     | 85, 124, $\infty_4$                   | 220   | 53, 92, $\infty_4$      |
| 86, 191, $\infty_5$     | 30    | 116, 221, $\infty_5$    | 119, 149, $\infty_6$                  | 227   | 94, 124, $\infty_6$     |
| 128, 148, $\infty_7$    | 92    | 220, 240, $\infty_7$    | 150, 187, $\infty_8$                  | 61    | 211, 248, $\infty_8$    |
| 155, 202, $\infty_9$    | 90    | 245, 40, $\infty_9$     | 169, 206, $\infty_{10}$               | 118   | 35, 72, $\infty_{10}$   |
| 171, 186, $\infty_{11}$ | 58    | 229, 244, $\infty_{11}$ | 177, 200, $\infty_{12}$               | 205   | 130, 153, $\infty_{12}$ |
| 194, 211, $\infty_{13}$ | 101   | 43, 60, $\infty_{13}$   | 195, 219, $\infty_{14}$               | 87    | 30, 54, $\infty_{14}$   |
| 205, 220, $\infty_{15}$ | 222   | 175, 190, $\infty_{15}$ | 209, 226, $\infty_{16}$               | 146   | 103, 120, $\infty_{16}$ |
| 17, 135, $\infty_{17}$  | 93    | 110, 228, $\infty_{17}$ | 82, 181, $\infty_{18}$                | 202   | 32, 131, $\infty_{18}$  |
| 125, 170, $\infty_{19}$ | 64    | 189, 234, $\infty_{19}$ | 127, 218, $\infty_{20}$               | 207   | 82, 173, $\infty_{20}$  |
| 129, 231, $\infty_{21}$ | 55    | 184, 34, $\infty_{21}$  | 130, 136, $\infty_{22}$               | 111   | 241, 247, $\infty_{22}$ |
| 131, 212, $\infty_{23}$ | 243   | 122, 203, $\infty_{23}$ | 132, 250, $\infty_{24}$               | 195   | 75, 193, $\infty_{24}$  |
| 133, 143, $\infty_{25}$ | 29    | 162, 172, $\infty_{25}$ | 134, 208, $\infty_{26}$               | 46    | 180, 2, $\infty_{26}$   |

**Table G** (S, C, R) and A for a (1, 2, 3)-frame of type  $27^5 27^1$ 

| C                      |       | R                       | A (1, 2, 3)-frame of type $27^5 27^1$ |     |                         |
|------------------------|-------|-------------------------|---------------------------------------|-----|-------------------------|
| 42, 86, 133            |       | 34, 63, 101             |                                       |     |                         |
| 38, 72, 109            |       | 41, 78, 124             |                                       |     |                         |
| 36, 58, 104            |       | 37, 66, 113             |                                       |     |                         |
| 28, 54, 92             |       | 26, 48, 79              |                                       |     |                         |
| 24, 52, 83             |       | 23, 49, 81              |                                       |     |                         |
| 22, 39, 56             |       | 19, 33, 47              |                                       |     |                         |
| 14, 27, 46             |       | 13, 21, 29              |                                       |     |                         |
| 9, 16, 32              |       | 8, 12, 31               |                                       |     |                         |
| 7, 11, 18              |       | 4, 6, 17                |                                       |     |                         |
| Starter                | Adder | Starter+ Adder          |                                       |     |                         |
| 21, 82, 94             | 22    | 43, 104, 116            | 19, 37, 43                            | 9   | 28, 46, 52              |
| 8, 17, 29              | 59    | 67, 76, 88              | 34, 67, 103                           | 19  | 53, 86, 122             |
| 26, 89, 128            | 18    | 44, 107, 11             | 23, 77, 101                           | 16  | 39, 93, 117             |
| 1, 2, 3                | 56    | 57, 58, 59              | 4, 13, 31                             | 58  | 62, 71, 89              |
| 6, 12, 48              | 86    | 92, 98, 134             | 76, 134, $\infty_0$                   | 8   | 84, 7, $\infty_0$       |
| 73, 114, $\infty_1$    | 14    | 87, 128, $\infty_1$     | 74, 127, $\infty_2$                   | 17  | 91, 9, $\infty_2$       |
| 71, 122, $\infty_3$    | 132   | 68, 119, $\infty_3$     | 68, 124, $\infty_4$                   | 29  | 97, 18, $\infty_4$      |
| 59, 98, $\infty_5$     | 73    | 132, 36, $\infty_5$     | 61, 123, $\infty_6$                   | 13  | 74, 1, $\infty_6$       |
| 64, 113, $\infty_7$    | 38    | 102, 16, $\infty_7$     | 62, 119, $\infty_8$                   | 127 | 54, 111, $\infty_8$     |
| 53, 96, $\infty_9$     | 53    | 106, 14, $\infty_9$     | 49, 97, $\infty_{10}$                 | 24  | 73, 121, $\infty_{10}$  |
| 47, 88, $\infty_{11}$  | 49    | 96, 2, $\infty_{11}$    | 81, 129, $\infty_{12}$                | 33  | 114, 27, $\infty_{12}$  |
| 84, 126, $\infty_{13}$ | 47    | 131, 38, $\infty_{13}$  | 91, 112, $\infty_{14}$                | 21  | 112, 133, $\infty_{14}$ |
| 99, 102, $\infty_{15}$ | 27    | 126, 129, $\infty_{15}$ | 108, 111, $\infty_{16}$               | 96  | 69, 72, $\infty_{16}$   |
| 79, 106, $\infty_{17}$ | 3     | 82, 109, $\infty_{17}$  | 78, 121, $\infty_{18}$                | 113 | 56, 99, $\infty_{18}$   |
| 69, 118, $\infty_{19}$ | 39    | 108, 22, $\infty_{19}$  | 66, 117, $\infty_{20}$                | 101 | 32, 83, $\infty_{20}$   |
| 63, 132, $\infty_{21}$ | 64    | 127, 61, $\infty_{21}$  | 57, 131, $\infty_{22}$                | 81  | 3, 77, $\infty_{22}$    |
| 51, 107, $\infty_{23}$ | 52    | 103, 24, $\infty_{23}$  | 44, 116, $\infty_{24}$                | 7   | 51, 123, $\infty_{24}$  |
| 41, 93, $\infty_{25}$  | 1     | 42, 94, $\infty_{25}$   | 33, 87, $\infty_{26}$                 | 31  | 64, 118, $\infty_{26}$  |

**Table H** Starter blocks and adders for (3, 2)-DRGDDs of type  $9^u$ 

| $u$                | Starter            | Adder              | Starter            | Adder              | Starter            | Adder |
|--------------------|--------------------|--------------------|--------------------|--------------------|--------------------|-------|
| 4                  | 0, 1, 2            | 0                  | 3, 5, 10           | 1                  | 4, 8, 12           | 4     |
|                    | 6, 17, $\infty_1$  | 7                  | 7, 20, $\infty_2$  | 12                 | 9, 19, $\infty_3$  | 6     |
|                    | 11, 21, $\infty_4$ | 9                  | 13, 26, $\infty_5$ | 10                 | 14, 25, $\infty_6$ | 20    |
|                    | 15, 22, $\infty_7$ | 22                 | 16, 24, $\infty_8$ | 25                 | 18, 23, $\infty_9$ | 3     |
|                    |                    |                    |                    |                    |                    |       |
| 5                  | 0, 1, 2            | 0                  | 3, 5, 8            | 1                  | 4, 7, 13           | 3     |
|                    | 6, 11, 20          | 2                  | 9, 16, 27          | 14                 | 10, 23, 29         | 4     |
|                    | 12, 25, $\infty_1$ | 9                  | 14, 28, $\infty_2$ | 11                 | 15, 30, $\infty_3$ | 5     |
|                    | 17, 32, $\infty_4$ | 15                 | 18, 35, $\infty_5$ | 13                 | 19, 26, $\infty_6$ | 34    |
|                    | 21, 31, $\infty_7$ | 33                 | 22, 33, $\infty_8$ | 29                 | 24, 34, $\infty_9$ | 31    |
| 6                  | 16, 30, 43         | 0                  | 14, 33, 41         | 1                  | 12, 23, 44         | 2     |
|                    | 11, 19, 28         | 7                  | 0, 1, 2            | 3                  | 3, 5, 9            | 4     |
|                    | 4, 7, 10           | 17                 | 6, 13, 20          | 25                 | 8, 27, 31          | 9     |
|                    | 15, 32, $\infty_1$ | 32                 | 17, 39, $\infty_2$ | 16                 | 18, 34, $\infty_3$ | 19    |
|                    | 21, 42, $\infty_4$ | 23                 | 22, 38, $\infty_5$ | 35                 | 24, 36, $\infty_6$ | 5     |
| 25, 37, $\infty_7$ | 14                 | 26, 35, $\infty_8$ | 42                 | 29, 40, $\infty_9$ | 27                 |       |
| 7                  | 21, 36, 52         | 0                  | 19, 32, 53         | 1                  | 18, 35, 46         | 4     |
|                    | 17, 30, 49         | 2                  | 0, 1, 2            | 3                  | 3, 5, 8            | 5     |
|                    | 4, 7, 11           | 7                  | 6, 10, 15          | 19                 | 9, 16, 24          | 32    |
|                    | 12, 20, 39         | 43                 | 13, 33, 42         | 11                 | 14, 37, 47         | 23    |
|                    | 22, 38, $\infty_1$ | 8                  | 23, 48, $\infty_2$ | 46                 | 25, 51, $\infty_3$ | 41    |
| 26, 40, $\infty_4$ | 9                  | 27, 44, $\infty_5$ | 53                 | 28, 50, $\infty_6$ | 49                 |       |
| 29, 43, $\infty_7$ | 18                 | 31, 41, $\infty_8$ | 40                 | 34, 45, $\infty_9$ | 51                 |       |
| 8                  | 19, 38, 60         | 0                  | 18, 47, 58         | 3                  | 17, 30, 56         | 1     |
|                    | 16, 27, 54         | 8                  | 26, 43, 59         | 4                  | 25, 45, 61         | 7     |
|                    | 24, 39, 62         | 2                  | 22, 40, 55         | 11                 | 0, 1, 2            | 6     |
|                    | 3, 5, 8            | 9                  | 4, 7, 12           | 16                 | 6, 10, 14          | 39    |
|                    | 9, 15, 21          | 33                 | 11, 29, 42         | 14                 | 13, 23, 52         | 21    |
|                    | 20, 51, $\infty_1$ | 52                 | 28, 48, $\infty_2$ | 51                 | 31, 57, $\infty_3$ | 43    |
|                    | 32, 41, $\infty_4$ | 26                 | 33, 50, $\infty_5$ | 59                 | 34, 53, $\infty_6$ | 25    |
| 35, 44, $\infty_7$ | 41                 | 36, 46, $\infty_8$ | 19                 | 37, 49, $\infty_9$ | 53                 |       |

**Table H (Cont.)** Starter blocks and adders for (3,2)-DRGDDs of type 9<sup>u</sup>

| $u$                  | Starter            | Adder        | Starter              | Adder        | Starter              | Adder        |     |
|----------------------|--------------------|--------------|----------------------|--------------|----------------------|--------------|-----|
| 9                    | 19, 54, 66         | 0            | 17, 60, 71           | 1            | 14, 36, 56           | 2            |     |
|                      | 13, 23, 33         | 4            | 32, 46, 58           | 7            | 31, 45, 70           | 3            |     |
|                      | 21, 49, 62         | 8            | 20, 35, 65           | 6            | 30, 51, 68           | 12           |     |
|                      | 28, 47, 64         | 5            | 26, 48, 69           | 14           | 24, 43, 61           | 21           |     |
|                      | 0, 1, 2            | 22           | 3, 5, 8              | 27           | 4, 7, 11             | 39           |     |
|                      | 6, 10, 15          | 71           | 9, 42, 55            | 42           | 12, 27, 50           | 66           |     |
|                      | 16, 39, $\infty_1$ | 40           | 18, 59, $\infty_2$   | 41           | 22, 67, $\infty_3$   | 65           |     |
|                      | 25, 53, $\infty_4$ | 50           | 29, 38, $\infty_5$   | 38           | 34, 40, $\infty_6$   | 15           |     |
|                      | 37, 44, $\infty_7$ | 48           | 41, 52, $\infty_8$   | 67           | 57, 63, $\infty_9$   | 11           |     |
|                      | 10                 | 31, 44, 72   | 0                    | 29, 52, 66   | 1                    | 22, 47, 61   | 2   |
| 18, 42, 67           |                    | 3            | 35, 51, 68           | 5            | 26, 55, 79           | 6            |     |
| 24, 41, 71           |                    | 9            | 23, 58, 74           | 4            | 34, 54, 73           | 14           |     |
| 33, 53, 76           |                    | 13           | 30, 56, 78           | 8            | 28, 49, 75           | 26           |     |
| 0, 1, 2              |                    | 10           | 3, 5, 8              | 20           | 4, 7, 11             | 48           |     |
| 6, 10, 16            |                    | 31           | 9, 14, 20            | 51           | 12, 19, 27           | 71           |     |
| 13, 25, 57           |                    | 63           | 15, 36, 46           | 64           | 17, 48, 63           | 34           |     |
| 21, 59, $\infty_1$   |                    | 22           | 32, 43, $\infty_2$   | 52           | 37, 50, $\infty_3$   | 66           |     |
| 38, 60, $\infty_4$   |                    | 79           | 39, 80, $\infty_5$   | 35           | 40, 69, $\infty_6$   | 54           |     |
| 45, 64, $\infty_7$   |                    | 32           | 62, 70, $\infty_8$   | 37           | 65, 77, $\infty_9$   | 73           |     |
| 14                   |                    | 22, 32, 44   | 0                    | 21, 37, 64   | 2                    | 20, 81, 92   | 1   |
|                      |                    | 19, 93, 101  | 5                    | 49, 63, 109  | 4                    | 40, 58, 104  | 3   |
|                      |                    | 39, 55, 72   | 7                    | 29, 65, 85   | 6                    | 53, 89, 107  | 10  |
|                      | 47, 69, 88         | 8            | 31, 75, 106          | 9            | 30, 71, 90           | 12           |     |
|                      | 54, 77, 102        | 18           | 36, 56, 103          | 13           | 34, 74, 116          | 11           |     |
|                      | 33, 57, 80         | 17           | 52, 86, 115          | 28           | 43, 87, 112          | 14           |     |
|                      | 42, 70, 108        | 16           | 41, 68, 96           | 32           | 50, 83, 114          | 59           |     |
|                      | 48, 78, 110        | 99           | 46, 84, 113          | 24           | 45, 79, 111          | 43           |     |
|                      | 0, 1, 2            | 103          | 3, 5, 8              | 73           | 4, 7, 11             | 83           |     |
|                      | 6, 12, 99          | 35           | 9, 13, 18            | 20           | 10, 16, 27           | 38           |     |
|                      | 14, 28, 35         | 116          | 15, 24, 73           | 95           | 17, 38, 97           | 51           |     |
|                      | 23, 91, $\infty_1$ | 41           | 25, 62, $\infty_2$   | 50           | 26, 98, $\infty_3$   | 33           |     |
|                      | 51, 66, $\infty_4$ | 67           | 59, 67, $\infty_5$   | 86           | 60, 100, $\infty_6$  | 69           |     |
|                      | 61, 76, $\infty_7$ | 60           | 82, 94, $\infty_8$   | 29           | 95, 105, $\infty_9$  | 30           |     |
|                      | 20                 | 36, 125, 148 | 42                   | 6, 9, 17     | 144                  | 67, 117, 163 | 90  |
|                      |                    | 33, 49, 133  | 95                   | 81, 114, 166 | 77                   | 77, 124, 165 | 64  |
|                      |                    | 48, 103, 159 | 166                  | 82, 111, 145 | 36                   | 19, 70, 85   | 133 |
| 71, 92, 137          |                    | 85           | 2, 4, 5              | 103          | 29, 80, 138          | 146          |     |
| 14, 23, 83           |                    | 102          | 27, 97, 129          | 72           | 7, 18, 154           | 148          |     |
| 50, 89, 142          |                    | 169          | 73, 102, 136         | 87           | 45, 104, 132         | 39           |     |
| 64, 107, 150         |                    | 22           | 35, 53, 127          | 59           | 76, 120, 169         | 25           |     |
| 51, 105, 158         |                    | 10           | 42, 69, 130          | 8            | 52, 119, 156         | 7            |     |
| 37, 59, 131          |                    | 114          | 46, 100, 152         | 136          | 28, 58, 126          | 159          |     |
| 63, 91, 161          |                    | 142          | 40, 87, 112          | 97           | 3, 10, 160           | 82           |     |
| 79, 110, 141         |                    | 127          | 54, 128, 164         | 143          | 21, 39, 62           | 100          |     |
| 74, 122, 170         |                    | 74           | 0, 1, 8              | 75           | 68, 113, 168         | 52           |     |
| 16, 22, 26           |                    | 15           | 20, 32, 47           | 13           | 15, 24, 41           | 29           |     |
| 72, 118, 162         |                    | 31           | 55, 90, 146          | 33           | 78, 115, 155         | 55           |     |
| 65, 123, 147         |                    | 115          | 60, 99, 167          | 99           | 13, 30, 43           | 50           |     |
| 56, 98, 134          |                    | 66           | 61, 101, 151         | 41           | 84, 116, 149         | 62           |     |
| 11, 25, 31           |                    | 79           | 66, 108, 157         | 68           | 12, 34, 38           | 30           |     |
| 44, 57, $\infty_1$   |                    | 12           | 75, 95, $\infty_2$   | 14           | 86, 88, $\infty_3$   | 164          |     |
| 93, 109, $\infty_4$  |                    | 18           | 94, 106, $\infty_5$  | 89           | 96, 121, $\infty_6$  | 78           |     |
| 135, 140, $\infty_7$ |                    | 155          | 139, 144, $\infty_8$ | 162          | 143, 153, $\infty_9$ | 124          |     |

**Table I** Starter blocks and adders for (3,2)-DRGDDs of type  $18^u$ 

| $u$                   | Starter                 | Adder      | Starter                | Adder       | Starter                | Adder       |    |
|-----------------------|-------------------------|------------|------------------------|-------------|------------------------|-------------|----|
| 4                     | 0, 1, 20                | 0          | 3, 5, 34               | 1           | 4, 8, 21               | 3           |    |
|                       | 6, 11, 22               | 4          | 7, 14, 39              | 2           | 9, 13, 32              | 34          |    |
|                       | 12, 23, $\infty_1$      | 36         | 17, 19, $\infty_2$     | 8           | 15, 28, $\infty_3$     | 25          |    |
|                       | 26, 52, $\infty_4$      | 16         | 16, 30, $\infty_5$     | 21          | 33, 50, $\infty_6$     | 53          |    |
|                       | 18, 40, $\infty_7$      | 32         | 36, 46, $\infty_8$     | 41          | 37, 51, $\infty_9$     | 39          |    |
|                       | 25, 41, $\infty_{10}$   | 5          | 42, 47, $\infty_{11}$  | 46          | 44, 45, $\infty_{12}$  | 12          |    |
|                       | 27, 53, $\infty_{13}$   | 18         | 38, 48, $\infty_{14}$  | 35          | 35, 43, $\infty_{15}$  | 9           |    |
|                       | 29, 49, $\infty_{16}$   | 33         | 24, 31, $\infty_{17}$  | 7           | 2, 10, $\infty_{18}$   | 11          |    |
|                       | 5                       | 1, 35, 66  | 0                      | 0, 3, 18    | 2                      | 4, 25, 63   | 4  |
| 6, 69, 71             |                         | 1          | 8, 27, 62              | 3           | 10, 19, 65             | 6           |    |
| 9, 38, 40             |                         | 5          | 11, 21, 22             | 10          | 14, 15, 29             | 8           |    |
| 13, 30, 52            |                         | 11         | 5, 16, 58              | 23          | 2, 7, 44               | 31          |    |
| 12, 39, $\infty_1$    |                         | 7          | 17, 20, $\infty_2$     | 27          | 23, 33, $\infty_3$     | 19          |    |
| 43, 49, $\infty_4$    |                         | 15         | 46, 59, $\infty_5$     | 9           | 47, 53, $\infty_6$     | 59          |    |
| 50, 64, $\infty_7$    |                         | 12         | 51, 56, $\infty_8$     | 70          | 42, 67, $\infty_9$     | 17          |    |
| 41, 68, $\infty_{10}$ |                         | 57         | 37, 70, $\infty_{11}$  | 53          | 36, 61, $\infty_{12}$  | 21          |    |
| 34, 57, $\infty_{13}$ |                         | 51         | 32, 55, $\infty_{14}$  | 67          | 31, 60, $\infty_{15}$  | 29          |    |
| 28, 54, $\infty_{16}$ |                         | 33         | 26, 48, $\infty_{17}$  | 30          | 24, 45, $\infty_{18}$  | 24          |    |
| 6                     |                         | 12, 21, 33 | 27                     | 14, 25, 37  | 12                     | 26, 45, 69  | 9  |
|                       |                         | 22, 39, 61 | 19                     | 34, 60, 83  | 16                     | 31, 58, 82  | 11 |
|                       | 0, 46, 74               | 13         | 3, 5, 9                | 52          | 20, 38, 56             | 18          |    |
|                       | 8, 15, 24               | 0          | 11, 19, 52             | 1           | 28, 50, 87             | 2           |    |
|                       | 30, 59, 88              | 3          | 16, 29, 42             | 5           | 18, 32, 75             | 4           |    |
|                       | 6, 13, 17               | 10         | 4, 7, 10               | 7           | 23, 40, 77             | 23          |    |
|                       | 1, 53, $\infty_1$       | 17         | 2, 64, $\infty_2$      | 26          | 27, 73, $\infty_3$     | 24          |    |
|                       | 51, 65, $\infty_4$      | 21         | 54, 55, $\infty_5$     | 30          | 57, 76, $\infty_6$     | 78          |    |
|                       | 63, 84, $\infty_7$      | 8          | 66, 67, $\infty_8$     | 29          | 70, 72, $\infty_9$     | 86          |    |
|                       | 71, 79, $\infty_{10}$   | 84         | 49, 80, $\infty_{11}$  | 85          | 47, 81, $\infty_{12}$  | 41          |    |
|                       | 44, 78, $\infty_{13}$   | 89         | 43, 85, $\infty_{14}$  | 87          | 41, 89, $\infty_{15}$  | 68          |    |
|                       | 48, 86, $\infty_{16}$   | 33         | 36, 68, $\infty_{17}$  | 47          | 35, 62, $\infty_{18}$  | 59          |    |
|                       | 7                       | 17, 30, 94 | 0                      | 18, 89, 93  | 2                      | 19, 34, 50  | 3  |
|                       |                         | 21, 47, 88 | 4                      | 15, 64, 102 | 1                      | 26, 45, 79  | 5  |
|                       |                         | 27, 73, 84 | 6                      | 2, 63, 67   | 7                      | 24, 37, 51  | 8  |
|                       |                         | 25, 48, 83 | 10                     | 1, 82, 104  | 14                     | 10, 69, 101 | 9  |
| 11, 74, 90            |                         | 12         | 7, 87, 96              | 11          | 8, 22, 42              | 18          |    |
| 29, 36, 44            |                         | 13         | 6, 28, 39              | 15          | 4, 54, 77              | 23          |    |
| 3, 5, 85              |                         | 31         | 0, 106, 107            | 48          | 14, 66, 71             | 38          |    |
| 13, 23, 33            |                         | 43         | 12, 20, 103            | 60          | 9, 16, 62              | 53          |    |
| 31, 76, $\infty_1$    |                         | 30         | 32, 75, $\infty_2$     | 57          | 35, 38, $\infty_3$     | 33          |    |
| 40, 61, $\infty_4$    |                         | 61         | 41, 70, $\infty_5$     | 44          | 43, 95, $\infty_6$     | 76          |    |
| 46, 78, $\infty_7$    |                         | 27         | 56, 100, $\infty_8$    | 90          | 65, 68, $\infty_9$     | 107         |    |
| 72, 81, $\infty_{10}$ |                         | 39         | 57, 97, $\infty_{11}$  | 24          | 58, 105, $\infty_{12}$ | 91          |    |
| 59, 98, $\infty_{13}$ |                         | 49         | 60, 99, $\infty_{14}$  | 92          | 55, 80, $\infty_{15}$  | 32          |    |
| 53, 91, $\infty_{16}$ |                         | 22         | 52, 92, $\infty_{17}$  | 45          | 49, 86, $\infty_{18}$  | 50          |    |
| 8                     |                         | 1, 41, 66  | 46                     | 15, 44, 63  | 41                     | 28, 37, 125 | 42 |
|                       |                         | 9, 36, 49  | 48                     | 23, 56, 57  | 39                     | 0, 100, 104 | 22 |
|                       | 18, 64, 76              | 0          | 22, 45, 105            | 1           | 11, 107, 117           | 2           |    |
|                       | 5, 74, 87               | 3          | 13, 77, 78             | 4           | 29, 55, 60             | 5           |    |
|                       | 4, 21, 115              | 6          | 16, 24, 27             | 8           | 7, 54, 69              | 9           |    |
|                       | 10, 51, 118             | 10         | 17, 40, 83             | 11          | 20, 92, 122            | 13          |    |
|                       | 35, 46, 62              | 7          | 32, 38, 82             | 16          | 26, 30, 106            | 14          |    |
|                       | 12, 48, 99              | 18         | 34, 50, 52             | 21          | 25, 94, 103            | 20          |    |
|                       | 31, 39, 112             | 19         | 6, 53, 98              | 15          | 2, 75, 97              | 27          |    |
|                       | 19, 108, 120            | 17         | 3, 8, 93               | 23          | 14, 47, 85             | 45          |    |
|                       | 42, 116, $\infty_1$     | 121        | 43, 114, $\infty_2$    | 64          | 61, 80, $\infty_3$     | 49          |    |
|                       | 71, 95, $\infty_4$      | 37         | 73, 110, $\infty_5$    | 54          | 79, 96, $\infty_6$     | 119         |    |
|                       | 81, 91, $\infty_7$      | 12         | 84, 90, $\infty_8$     | 61          | 86, 89, $\infty_9$     | 120         |    |
|                       | 121, 123, $\infty_{10}$ | 91         | 72, 111, $\infty_{11}$ | 29          | 70, 102, $\infty_{12}$ | 123         |    |
|                       | 68, 88, $\infty_{13}$   | 50         | 67, 119, $\infty_{14}$ | 98          | 65, 124, $\infty_{15}$ | 76          |    |
|                       | 59, 113, $\infty_{16}$  | 56         | 58, 109, $\infty_{17}$ | 117         | 33, 101, $\infty_{18}$ | 100         |    |

**Table I (Cont.)** Starter blocks and adders for (3,2)-DRGDDs of type 18<sup>u</sup>

| $u$                     | Starter                 | Adder        | Starter                 | Adder        | Starter                 | Adder        |     |
|-------------------------|-------------------------|--------------|-------------------------|--------------|-------------------------|--------------|-----|
| 10                      | 18, 23, 61              | 99           | 28, 50, 57              | 34           | 40, 56, 91              | 19           |     |
|                         | 32, 118, 125            | 98           | 43, 46, 59              | 127          | 20, 100, 111            | 53           |     |
|                         | 37, 69, 135             | 141          | 11, 94, 102             | 146          | 35, 68, 87              | 25           |     |
|                         | 7, 72, 155              | 51           | 8, 74, 115              | 143          | 10, 66, 122             | 37           |     |
|                         | 21, 53, 123             | 154          | 70, 109, 112            | 73           | 3, 33, 144              | 74           |     |
|                         | 41, 128, 148            | 85           | 34, 110, 159            | 56           | 13, 39, 151             | 115          |     |
|                         | 5, 106, 139             | 0            | 9, 98, 145              | 1            | 36, 150, 154            | 2            |     |
|                         | 27, 136, 161            | 4            | 26, 85, 131             | 3            | 25, 93, 95              | 5            |     |
|                         | 1, 63, 103              | 6            | 17, 22, 140             | 10           | 38, 126, 160            | 11           |     |
|                         | 31, 116, 124            | 8            | 0, 52, 156              | 12           | 30, 114, 149            | 13           |     |
|                         | 29, 75, 76              | 7            | 24, 127, 133            | 9            | 19, 101, 132            | 15           |     |
|                         | 15, 99, 157             | 20           | 12, 80, 97              | 14           | 6, 81, 104              | 16           |     |
|                         | 4, 71, 92               | 21           | 2, 14, 16               | 26           | 51, 108, 146            | 17           |     |
|                         | 48, 67, 79              | 22           | 47, 62, 84              | 18           | 45, 49, 60              | 84           |     |
|                         | 44, 54, $\infty_1$      | 77           | 55, 78, $\infty_2$      | 63           | 64, 77, $\infty_3$      | 71           |     |
|                         | 73, 121, $\infty_4$     | 126          | 89, 119, $\infty_5$     | 119          | 105, 134, $\infty_6$    | 109          |     |
|                         | 117, 158, $\infty_7$    | 112          | 129, 153, $\infty_8$    | 83           | 137, 147, $\infty_9$    | 120          |     |
|                         | 141, 142, $\infty_{10}$ | 39           | 96, 113, $\infty_{11}$  | 42           | 90, 152, $\infty_{12}$  | 159          |     |
|                         | 88, 130, $\infty_{13}$  | 95           | 86, 120, $\infty_{14}$  | 59           | 82, 143, $\infty_{15}$  | 76           |     |
|                         | 65, 138, $\infty_{16}$  | 96           | 58, 83, $\infty_{17}$   | 145          | 42, 107, $\infty_{18}$  | 134          |     |
|                         | 14                      | 13, 41, 203  | 220                     | 34, 68, 109  | 197                     | 37, 188, 218 | 71  |
|                         |                         | 12, 52, 159  | 117                     | 18, 82, 130  | 113                     | 29, 174, 194 | 128 |
|                         |                         | 11, 17, 209  | 18                      | 16, 112, 206 | 88                      | 6, 8, 15     | 35  |
|                         |                         | 2, 199, 232  | 65                      | 9, 25, 202   | 223                     | 10, 58, 170  | 208 |
|                         |                         | 38, 147, 180 | 127                     | 40, 124, 184 | 36                      | 49, 61, 228  | 30  |
|                         |                         | 22, 32, 79   | 176                     | 24, 160, 177 | 51                      | 27, 135, 230 | 43  |
| 33, 107, 231            |                         | 204          | 20, 168, 211            | 42           | 21, 91, 225             | 32           |     |
| 28, 193, 196            |                         | 228          | 30, 136, 154            | 39           | 31, 204, 214            | 78           |     |
| 46, 99, 179             |                         | 135          | 48, 57, 223             | 82           | 55, 111, 226            | 108          |     |
| 56, 102, 129            |                         | 57           | 59, 142, 187            | 55           | 45, 141, 165            | 97           |     |
| 70, 120, 175            |                         | 76           | 50, 150, 171            | 100          | 54, 86, 212             | 150          |     |
| 64, 126, 208            |                         | 190          | 65, 105, 133            | 134          | 69, 118, 185            | 64           |     |
| 101, 123, 138           |                         | 102          | 106, 191, 229           | 146          | 108, 143, 164           | 231          |     |
| 0, 220, 222             |                         | 149          | 23, 122, 215            | 186          | 74, 213, 233            | 148          |     |
| 14, 146, 151            |                         | 198          | 7, 116, 227             | 165          | 1, 26, 173              | 179          |     |
| 67, 114, 200            |                         | 156          | 63, 117, 216            | 129          | 19, 103, 176            | 59           |     |
| 94, 152, 183            |                         | 0            | 88, 93, 224             | 2            | 85, 96, 131             | 1            |     |
| 78, 89, 210             |                         | 3            | 53, 60, 132             | 4            | 39, 47, 166             | 5            |     |
| 5, 178, 201             |                         | 6            | 4, 84, 92               | 9            | 3, 161, 167             | 7            |     |
| 81, 169, 186            |                         | 8            | 80, 157, 172            | 58           | 76, 95, 155             | 11           |     |
| 51, 83, 110             |                         | 15           | 71, 72, 75              | 49           | 43, 77, 195             | 22           |     |
| 42, 139, 162            |                         | 17           | 35, 36, 219             | 10           | 44, 66, 137             | 158          |     |
| 73, 98, $\infty_1$      |                         | 75           | 90, 144, $\infty_2$     | 26           | 97, 115, $\infty_3$     | 91           |     |
| 100, 158, $\infty_4$    |                         | 160          | 104, 207, $\infty_5$    | 181          | 121, 192, $\infty_6$    | 24           |     |
| 140, 189, $\infty_7$    |                         | 101          | 153, 217, $\infty_8$    | 119          | 163, 182, $\infty_9$    | 205          |     |
| 205, 221, $\infty_{10}$ |                         | 125          | 62, 128, $\infty_{11}$  | 23           | 87, 181, $\infty_{12}$  | 196          |     |
| 113, 198, $\infty_{13}$ |                         | 155          | 119, 148, $\infty_{14}$ | 66           | 125, 149, $\infty_{15}$ | 192          |     |
| 127, 156, $\infty_{16}$ |                         | 233          | 134, 197, $\infty_{17}$ | 154          | 145, 190, $\infty_{18}$ | 31           |     |

**Table I (Cont.)** Starter blocks and adders for (3,2)-DRGDDs of type 18<sup>u</sup>

| $u$ | Starter                 | Adder | Starter                 | Adder | Starter                 | Adder |
|-----|-------------------------|-------|-------------------------|-------|-------------------------|-------|
| 20  | 107, 131, 163           | 43    | 80, 172, 190            | 215   | 117, 196, 249           | 103   |
|     | 98, 167, 179            | 19    | 71, 158, 264            | 85    | 46, 247, 299            | 139   |
|     | 54, 118, 287            | 27    | 39, 160, 164            | 268   | 35, 97, 313             | 99    |
|     | 81, 225, 291            | 322   | 53, 77, 173             | 274   | 13, 240, 340            | 127   |
|     | 61, 66, 336             | 201   | 72, 127, 168            | 107   | 148, 206, 211           | 307   |
|     | 82, 93, 194             | 250   | 76, 244, 281            | 115   | 69, 157, 236            | 54    |
|     | 26, 234, 320            | 144   | 79, 275, 304            | 257   | 102, 246, 302           | 184   |
|     | 95, 138, 318            | 74    | 114, 156, 315           | 33    | 11, 228, 255            | 29    |
|     | 38, 261, 300            | 94    | 55, 90, 317             | 98    | 64, 137, 283            | 187   |
|     | 49, 84, 339             | 190   | 57, 263, 292            | 281   | 34, 226, 303            | 207   |
|     | 144, 272, 312           | 129   | 145, 227, 258           | 333   | 86, 169, 215            | 276   |
|     | 78, 200, 326            | 40    | 67, 89, 142             | 237   | 22, 207, 209            | 116   |
|     | 36, 214, 316            | 91    | 83, 113, 289            | 234   | 94, 328, 329            | 278   |
|     | 85, 125, 150            | 206   | 73, 101, 178            | 262   | 70, 248, 274            | 102   |
|     | 17, 301, 310            | 161   | 18, 41, 305             | 298   | 21, 177, 210            | 196   |
|     | 7, 186, 256             | 253   | 111, 193, 278           | 332   | 87, 230, 257            | 233   |
|     | 88, 91, 119             | 135   | 124, 195, 198           | 302   | 75, 191, 294            | 178   |
|     | 130, 174, 268           | 320   | 1, 62, 273              | 92    | 2, 141, 233             | 56    |
|     | 44, 187, 235            | 244   | 65, 115, 297            | 275   | 28, 309, 323            | 179   |
|     | 24, 180, 212            | 133   | 19, 40, 252             | 282   | 132, 231, 290           | 284   |
|     | 14, 56, 307             | 236   | 9, 279, 338             | 155   | 12, 161, 232            | 285   |
|     | 42, 50, 237             | 174   | 121, 205, 280           | 156   | 8, 296, 314             | 304   |
|     | 3, 245, 311             | 300   | 15, 218, 306            | 306   | 10, 217, 251            | 305   |
|     | 92, 129, 331            | 289   | 99, 108, 116            | 136   | 6, 171, 183             | 231   |
|     | 4, 128, 188             | 229   | 106, 166, 308           | 319   | 59, 140, 334            | 287   |
|     | 43, 136, 159            | 123   | 52, 63, 181             | 256   | 60, 221, 319            | 162   |
|     | 112, 155, 223           | 198   | 0, 176, 189             | 221   | 5, 126, 250             | 172   |
|     | 30, 203, 321            | 263   | 120, 165, 204           | 189   | 110, 184, 199           | 0     |
|     | 105, 286, 293           | 1     | 74, 104, 201            | 8     | 16, 253, 254            | 117   |
|     | 96, 224, 241            | 39    | 37, 222, 242            | 167   | 29, 51, 324             | 329   |
|     | 20, 45, 192             | 227   | 109, 154, 208           | 5     | 100, 133, 325           | 9     |
|     | 33, 271, 285            | 128   | 27, 139, 333            | 202   | 48, 282, 288            | 14    |
|     | 103, 147, 153           | 153   | 23, 25, 185             | 213   | 68, 202, 265            | 126   |
|     | 58, 322, 332            | 53    | 32, 152, 243            | 75    | 31, 47, 182             | 84    |
|     | 330, 337, $\infty_1$    | 220   | 123, 229, $\infty_2$    | 338   | 134, 220, $\infty_3$    | 28    |
|     | 270, 335, $\infty_4$    | 235   | 146, 259, $\infty_5$    | 283   | 269, 295, $\infty_6$    | 328   |
|     | 267, 277, $\infty_7$    | 191   | 262, 266, $\infty_8$    | 67    | 238, 284, $\infty_9$    | 104   |
|     | 197, 327, $\infty_{10}$ | 180   | 213, 298, $\infty_{11}$ | 70    | 219, 239, $\infty_{12}$ | 145   |
|     | 175, 216, $\infty_{13}$ | 267   | 170, 260, $\infty_{14}$ | 160   | 162, 341, $\infty_{15}$ | 246   |
|     | 149, 276, $\infty_{16}$ | 61    | 135, 151, $\infty_{17}$ | 209   | 122, 143, $\infty_{18}$ | 252   |
